# Supplementary material for: Differences in the Synovial Fluid Proteome of Septic and Aseptic Implant Failure
Source: Antibiotics (Basel). 2024 Apr 9;13(4):346. doi: 10.3390/antibiotics13040346 (PMC11047638; doi:10.3390/antibiotics13040346)
Supplement: Supplementary file 1 [file antibiotics-13-00346-s001.zip › antibiotics-2929490-supplementary.xlsx]

## Sheet: Supplementary Table S1
Supplementary Table 1: List of proteins identified with at least 2 peptides. Information on the frequency per sample and the average abundance are given. Intensities are log2 converted.
Symbol	Name	LFQ intensity 01	LFQ intensity 02	LFQ intensity 05	LFQ intensity 08	LFQ intensity 12	LFQ intensity 14	LFQ intensity 16	LFQ intensity 21	Freq. [%] septic cases	Avg. Abundance septic	LFQ intensity 03	LFQ intensity 04	LFQ intensity 06	LFQ intensity 07	LFQ intensity 09	LFQ intensity 10	LFQ intensity 11	LFQ intensity 15	LFQ intensity 18	LFQ intensity 19	LFQ intensity 22	LFQ intensity 23	LFQ intensity 24	Frequ [%] aseptic cases	Avg. Abundance aseptic
IGKV2D-29	Immunoglobulin kappa variable 2D-29	24.8586	24.2421	24.9579	24.2227	24.3547	24.3803	23.4737	24.539	100	24.3786	25.1115	25.8313	25.2142	26.4606	24.1109	24.7678	24.5831	25.3314	25.6065	24.8881	24.6766	24.449	23.8975	100	24.9945
IGHV3-49	Immunoglobulin heavy variable 3-49	18.1228	17.9495	20.3236	18.8931	18.4146	18.2635	19.9386	20.4175	100	19.0404	19.1058	20.6155	18.3753	18.9851	18.3729	19.9031	18.7251	19.5281	19.8524	20.9909	20.7848	20.521	20.3262	100	19.6989
IGHV5-51	Immunoglobulin heavy variable 5-51	21.3841	22.1719	23.2097	21.0482	21.9634	21.5751	21.1849	19.165	100	21.4628	22.2753	23.0843	22.2887	22.6524	21.0574	21.5581	22.4734	21.9448	21.2033	21.7444	21.8224	21.2938	21.5827	100	21.9216
IGKV1-8;IGKV1-9	Immunoglobulin kappa variable 1-8;Immunoglobulin kappa variable 1-9	22.1795	20.133	21.4358	20.1316	20.6273	21.0248	20.4685	20.7274	100	20.841	21.0627	21.7988	21.5954	22.338	20.3455	21.0351	20.3982	22.4177	20.6853	21.4044	21.3831	21.3253	20.6815	100	21.267
IGLL5;IGLC1	Immunoglobulin lambda-like polypeptide 5;Immunoglobulin lambda constant 1	26.42	25.8514	26.0586	25.0402	26.0547	25.0427	25.578	26.4815	100	25.8159	26.5111	25.6983	25.6813	25.828	25.3989	25.1025	24.978	25.9043	26.0636	25.9905	25.8496	25.5907	25.2754	100	25.6825
		27.8852	26.7129	27.2714	26.0783	27.5475	28.0632	27.1607	27.1263	100	27.2307	27.4166	27.3245	27.7579	27.9767	26.2805	27.5155	27.3517	27.5273	27.3607	27.3974	27.283	27.3368	26.8027	100	27.3332
ALB	Albumin;	26.968	28.8924	28.1866	27.5708	28.8311	28.7868	28.4837	28.3045	100	28.253	29.0606	28.5938	27.972	28.9211	27.9174	28.5463	28.2334	29.2485	28.767	29.0476	28.6867	28.5206	28.2557	100	28.5978
KRT10	Keratin, type I cytoskeletal 10;	22.968	20.1733	19.9704	18.3119	20.8372	20.5055	19.1502	19.5884	100	20.1881	20.4595	18.2277	22.1886	24.2389	18.8393	17.7078	18.4837	20.7498	19.383	18.8731	20.3315	21.6454	21.8811	100	20.2315
KRT2	;Keratin, type II cytoskeletal 2 epidermal;	21.1565	18.9542	17.2802	15.1124	20.2568	19.0356	15.8798	16.5344	100	18.0262	17.5394	14.6813	20.9445	22.3754	15.6582	16.0612	15.4838	19.0488	15.9539	16.1248	17.6256	19.0879	20.6629	100	17.7883
APOL1	Apolipoprotein L1	22.2556	20.6114	21.3165	20.2855	20.5447	21.3387	21.1896	20.9004	100	21.0553	20.3955	20.9158	20.946	20.8499	20.5699	20.9745	19.5359	20.4691	20.5952	19.908	20.8343	21.1123	20.845	100	20.6116
ATRN	Attractin	22.7529	20.1883	19.4659	18.388	19.435	20.0746	19.6435	19.9989	100	19.9934	20.3576	20.1444	20.9042	20.8281	18.422	20.0817	19.2452	20.2148	19.7825	20.205	20.1024	20.1498	19.8682	100	20.0235
APOM	Apolipoprotein M	24.1821	19.631	18.9843	20.0979	19.2903	19.4991	19.6291	19.8979	100	20.1515	18.6558	19.6757	19.3807	20.1158	20.3053	18.8045	18.4719	19.0427	19.4764	18.9134	20.1542	20.3893	20.1602	100	19.5035
LDHA	L-lactate dehydrogenase A chain	20.8606	19.5967	20.1153	19.2291	19.973	19.7916	20.8935	20.5742	100	20.1292	19.2503	20.1451	20.776	18.388	19.4713	19.9953	22.3918	19.0768	20.0527	20.5063	21.9014	19.4671	20.9394	100	20.1817
CP	Ceruloplasmin	21.4697	24.1057	24.6823	22.906	23.5843	23.6388	23.605	23.9396	100	23.4914	23.9314	24.273	24.1161	24.123	23.1845	23.8897	22.9058	24.0326	23.4224	23.7796	23.7849	23.9349	23.9538	100	23.7947
F2	Prothrombin	20.9742	22.7814	22.477	24.1482	21.5411	22.2845	22.3286	22.9486	100	22.4355	22.5695	22.1196	22.6743	23.1878	24.0294	22.8192	21.4073	21.9089	21.8854	20.5976	20.3294	22.3759	22.0878	100	22.1532
C1R	Complement C1r subcomponent	19.8951	20.5442	20.8238	20.5184	20.4475	20.8538	20.5146	21.229	100	20.6033	20.1178	20.4364	20.9519	20.305	20.0876	20.4154	19.8981	20.0772	20.8886	19.5204	19.6815	20.5752	20.7109	100	20.282
HP	Haptoglobin	27.3733	27.3903	26.8022	25.1027	26.02	23.7071	27.1036	27.6272	100	26.3908	25.3001	26.3134	27.1809	22.4904	25.4914	26.9495	24.5854	25.3135	25.9666	24.6924	23.7629	26.2546	25.8256	100	25.3944
HPR	Haptoglobin-related protein	21.0028	19.828	21.444	19.6584	21.242	20.9312	21.3585	20.7622	100	20.7784	20.2212	20.5081	20.7412	21.3841	20.306	20.9985	21.3438	21.495	19.719	20.8237	21.7872	21.5947	21.8361	100	20.9814
F9	Coagulation factor IX	18.125	19.2119	19.1416	21.6183	18.7291	19.0726	19.6082	20.1143	100	19.4526	17.7021	19.5178	19.9647	18.4013	21.4605	19.5752	18.2922	18.1981	18.9394	17.1097	18.7454	19.8601	19.1859	100	18.9963
PLG	Plasminogen	20.5704	23.972	23.2628	24.0034	24.7057	22.8199	22.8915	23.4096	100	23.2044	23.7646	23.3721	23.0599	23.3693	23.6765	23.6472	22.8779	23.9958	24.052	23.6739	22.7255	24.0641	23.7117	100	23.5377
F12	Coagulation factor XII	18.0611	18.8532	19.6904	19.013	18.9506	19.9976	19.1354	21.4024	100	19.388	18.8648	19.7613	20.6845	19.1152	19.4834	19.9651	19.4411	20.4195	20.3168	20.3183	20.9108	21.1576	21.3654	100	20.1387
CFB	Complement factor B	23.8394	24.7874	24.4614	23.2521	24.2179	24.5045	24.1939	24.4743	100	24.2164	24.4921	24.1494	24.5382	24.4798	23.5005	24.3831	23.8541	23.9793	24.3984	23.6455	24.1943	24.5427	23.9216	100	24.1599
SERPINC1	Antithrombin-III	23.8123	24.0455	24.0601	24.0079	24.203	24.1141	23.9859	24.0062	100	24.0294	24.7533	24.0729	23.9742	24.7358	23.8974	24.4134	23.7282	24.2688	24.4536	24.2753	24.2057	24.0545	24.023	100	24.2197
SERPINA1	Alpha-1-antitrypsin	29.8339	26.4735	26.4403	24.1731	25.4813	26.5101	25.7903	25.8965	100	26.3249	25.7341	26.0445	26.0771	26.2639	24.602	25.8422	25.2884	26.0109	25.292	26.3029	25.5936	25.5457	25.9953	100	25.7379
SERPINA3	Alpha-1-antichymotrypsin	25.7054	26.0801	25.572	23.864	24.5347	26.1005	25.2306	25.3221	100	25.3012	25.1784	24.8257	24.9172	25.3949	24.374	25.3555	24.2324	25.1829	24.3143	24.5423	24.5432	24.9454	25.0154	100	24.8324
AGT	Angiotensinogen	20.87	21.4001	21.5406	20.4107	21.0272	22.3541	22.1253	22.586	100	21.5392	21.4598	21.9279	21.7351	22.6853	20.6908	22.1013	21.2148	22.3424	21.5293	22.5506	22.2115	22.0814	22.2212	100	21.904
A2M	Alpha-2-macroglobulin	24.45	25.8833	26.5836	24.9382	25.7108	26.2222	25.5442	26.0753	100	25.676	25.5142	26.9686	26.6527	25.9451	25.1288	26.6952	25.1474	25.6212	25.6259	26.4511	26.031	25.8074	25.6159	100	25.9388
C3	Complement C3	24.4453	26.377	26.3439	26.0248	25.8691	25.9458	26.1636	26.2674	100	25.9296	26.1481	26.1457	26.3676	25.7214	26.0914	25.9829	25.5203	25.749	26.0567	24.7994	25.6648	26.2993	25.8955	100	25.8802
C5	Complement C5	22.1508	24.237	24.528	23.9897	23.7396	24.4388	24.005	24.1239	100	23.9016	23.437	23.8962	24.1797	23.3943	23.9129	23.792	23.119	23.3922	23.7302	23.77	23.8946	24.3439	24.2813	100	23.7803
KNG1	Kininogen-1	26.0406	24.529	23.8263	24.1264	24.1888	24.2718	23.9186	24.0343	100	24.367	25.0978	24.2611	24.3043	24.8032	23.7947	24.598	23.5875	24.6376	24.6484	24.7713	24.2618	24.3828	24.1386	100	24.4067
	Immunoglobulin lambda variable 3-27;Immunoglobulin lambda variable 3-25	19.8677	18.6835	20.6706	20.4742	20.897	20.9426	19.5355	21.311	100	20.2978	20.7388	18.9096	20.2116	20.7043	20.0705	20.2341	20.6687	20.939	20.8936	20.8251	19.9278	21.2667	19.9057	100	20.4073
IGKC	Immunoglobulin kappa constant	28.5801	26.7895	27.1594	26.2513	27.2386	27.4176	26.8375	26.5646	100	27.1048	27.5135	27.5313	27.3938	27.617	26.3384	27.3625	26.8445	27.6975	26.8497	26.8235	26.7695	26.6694	26.4077	100	27.0629
IGHG1	Immunoglobulin heavy constant gamma 1	27.1444	27.2859	27.9329	26.9833	28.1725	27.9285	27.6762	27.7285	100	27.6065	28.5623	28.0469	27.6744	28.1691	27.1285	28.1756	27.4554	28.2243	27.6477	27.6808	27.755	27.8636	27.2852	100	27.8207
IGHG2	Immunoglobulin heavy constant gamma 2	25.2957	26.2911	27.1099	25.8694	27.098	26.6562	26.2588	27.4818	100	26.5076	27.6447	27.5333	26.8387	27.4789	26.1241	27.4987	26.797	27.0756	27.412	27.1206	27.111	26.5769	26.5369	100	27.0576
IGHG3	Immunoglobulin heavy constant gamma 3	20.9548	24.5366	23.7484	23.7364	24.866	24.6499	22.9047	24.3559	100	23.7191	26.0132	24.5529	23.7357	25.0641	24.4104	24.9432	23.8623	25.812	25.7271	25.1063	23.6063	23.8712	23.8342	100	24.6568
IGHG4	Immunoglobulin heavy constant gamma 4	23.9378	23.7606	25.5597	22.7918	25.4291	26.8508	25.5078	25.391	100	24.9036	27.1927	25.5976	24.3837	26.4106	23.5992	23.1402	23.7556	26.1692	25.4693	25.2214	25.5146	24.6082	25.0325	100	25.0842
IGHM	Immunoglobulin heavy constant mu	23.5358	25.2004	25.9958	23.8003	24.6166	25.233	25.9746	24.5927	100	24.8686	24.6915	24.6601	24.7358	25.5287	23.7773	24.3348	23.9004	24.4	23.6938	24.7162	25.9389	25.0796	25.3869	100	24.6803
IGHA1	Immunoglobulin heavy constant alpha 1	27.012	25.6391	26.6387	25.7096	26.5455	26.9476	25.0011	27.1024	100	26.3245	27.293	27.2538	26.4504	26.2223	26.1282	26.7424	25.6882	25.3675	26.992	26.061	26.0249	25.6493	25.7259	100	26.2768
COL1A1	Collagen alpha-1(I) chain	17.6085	19.9659	23.1741	23.4038	21.3445	22.6017	21.8763	19.5419	100	21.1896	21.2986	21.5154	20.8836	20.8939	23.7886	21.8749	21.9596	19.3408	22.2877	19.1667	20.5793	22.177	23.7427	100	21.5007
APOA1	Apolipoprotein A-I	28.2228	23.9996	25.9925	24.7272	25.761	27.1536	25.952	25.7033	100	25.939	25.6451	26.2718	26.2491	26.4751	24.8724	26.2669	25.606	24.8147	25.1752	24.4359	26.0709	25.4853	25.3813	100	25.5961
APOE	Apolipoprotein E	26.0439	22.4609	22.3717	22.2661	21.624	21.6007	21.9704	21.672	100	22.5012	22.2323	21.7262	22.8833	23.0137	22.3736	21.842	20.4036	22.5945	21.7271	22.2973	21.9232	22.0889	21.7179	100	22.0634
APOA2	Apolipoprotein A-II	23.8458	20.5174	21.2014	20.4558	21.0099	23.6526	22.3744	22.7684	100	21.9782	20.2523	22.0598	23.4553	21.3191	20.8033	21.2256	20.7654	20.6153	21.0277	19.8651	21.7061	21.7191	21.3794	100	21.2457
APOC3	Apolipoprotein C-III	23.9366	19.165	19.2576	18.9621	18.5082	19.7292	19.2025	19.8755	100	19.8296	19.1199	19.2789	20.3489	19.6308	18.6459	20.3641	18.3423	17.6276	18.3189	17.9447	18.7774	19.4608	18.9279	100	18.9837
FGA	Fibrinogen alpha chain	26.9904	23.2731	25.1752	26.4895	24.0299	25.4915	24.6807	24.5422	100	25.0841	25.7788	25.356	22.543	25.4759	26.3529	25.6511	24.7252	24.9677	25.6183	25.2978	25.4612	25.283	26.1004	100	25.2778
FGB	Fibrinogen beta chain	22.5209	20.6551	25.1841	26.1848	23.3948	24.9304	24.2447	24.0577	100	23.8966	24.7163	25.333	21.2625	24.5556	26.2537	25.3621	23.6516	23.5767	25.1096	24.0996	25.6726	25.4393	25.7521	100	24.6758
FGG	Fibrinogen gamma chain	22.0348	21.7413	25.8301	26.7787	24.3752	25.9488	25.216	25.0283	100	24.6192	25.5084	26.234	22.0593	25.3263	26.9629	26.0972	24.5572	24.6147	25.9904	25.1067	26.5363	26.5311	26.7317	100	25.5582
APCS	Serum amyloid P-component	20.6744	22.8984	22.3118	23.3283	21.9596	22.7679	21.7843	22.7128	100	22.3047	19.9311	21.5675	22.7309	20.5685	23.3218	22.1508	21.1947	19.1873	21.0678	18.6907	19.3935	21.7072	21.9116	100	21.0325
C1QA	Complement C1q subcomponent subunit A	21.3156	21.9249	22.1263	22.552	21.4399	22.8957	21.6974	21.605	100	21.9446	20.9892	21.527	21.9186	21.0263	22.3573	21.8489	20.7937	21.3372	20.8542	20.2836	20.7502	21.2466	21.9959	100	21.3022
C1QB	Complement C1q subcomponent subunit B	20.3395	21.7208	22.4564	22.2077	21.7501	22.5446	21.1381	22.0262	100	21.7729	21.7191	21.914	22.1996	21.3168	22.4013	21.7299	20.8853	21.6594	21.608	21.115	21.108	21.6885	21.5854	100	21.61
C1QC	Complement C1q subcomponent subunit C	19.0608	22.544	22.8052	22.6729	22.0665	21.6241	21.6132	22.3906	100	21.8472	22.1011	22.5118	21.5761	21.8407	22.6695	21.6733	20.9492	22.3498	21.9891	21.5432	21.4147	22.0611	22.2665	100	21.9189
C9	Complement component C9	22.3543	22.5046	22.5042	23.466	22.1095	22.0479	22.6357	22.7884	100	22.5513	21.3966	22.2521	21.9221	21.448	23.0526	22.1744	20.371	21.5242	21.9405	20.975	21.7517	22.2943	22.4074	100	21.8085
APOH	Beta-2-glycoprotein 1	24.8044	24.7054	22.2058	22.8224	23.7023	22.4614	22.6841	23.1723	100	23.3198	24.7497	22.5349	21.4937	23.2608	22.1772	22.47	21.8186	24.3864	24.0395	23.7651	22.4974	22.4303	22.7349	100	22.9506
LRG1	Leucine-rich alpha-2-glycoprotein	24.2864	20.4215	20.546	18.3909	17.8127	21.1644	19.8883	20.2841	100	20.3493	18.1824	19.3655	19.0742	18.8444	17.7099	19.6616	16.1827	17.5651	17.0018	18.6389	17.0489	18.953	19.2633	100	18.2686
FN1	Fibronectin	15.48	22.0816	23.5198	25.6257	23.0208	23.1193	22.4357	22.8956	100	22.2723	25.7572	22.8973	22.8045	25.7334	25.6448	22.8656	24.0735	25.9585	24.7524	25.826	23.6674	23.1918	23.3667	100	24.3492
RBP4	Retinol-binding protein 4	20.5535	21.8261	20.8436	20.3337	21.8466	21.3775	20.668	21.2104	100	21.0824	22.6173	21.5316	19.8199	22.9525	20.2535	21.7366	19.8976	22.6465	21.4159	22.7985	21.6855	21.6877	21.2015	100	21.5573
AMBP	Protein AMBP	27.5466	22.2734	22.2061	21.6648	22.2861	22.6919	21.7696	22.6471	100	22.8857	22.8005	22.1368	22.564	22.2084	22.0499	23.1926	21.403	21.8167	22.4861	22.2248	21.5816	21.7463	21.8783	100	22.1607
ORM1	Alpha-1-acid glycoprotein 1	28.3414	23.6712	22.8519	21.4275	22.2416	24.2475	22.7429	23.0674	100	23.5739	24.2466	22.1133	22.9913	22.8074	21.7387	22.998	22.005	22.7943	22.5348	22.1232	22.3842	22.8877	22.5498	100	22.6288
AHSG	Alpha-2-HS-glycoprotein	24.3378	24.916	24.8839	27.3176	25.3299	23.4794	24.8269	25.5481	100	25.0799	25.6184	25.8821	25.2649	26.5305	27.2334	25.1281	24.9609	26.0915	25.8693	25.9185	25.3949	25.2413	25.1212	100	25.7119
TTR	Transthyretin	23.9906	22.0404	23.5798	23.1573	23.2643	23.6536	22.8255	23.2548	100	23.2208	23.581	23.7322	24.4452	24.3086	22.933	24.2343	24.3191	23.458	23.263	23.9165	23.3695	22.7031	22.9011	100	23.628
GC	Vitamin D-binding protein	26.1624	23.6282	23.0447	22.3136	22.7391	23.8263	22.9131	23.8695	100	23.5621	23.3968	23.5736	23.7746	23.5878	22.7023	23.36	22.5582	23.6134	23.3012	22.7895	23.1043	23.3363	23.1536	100	23.2501
TF	Serotransferrin	24.2378	26.5625	26.8043	25.8121	27.1073	26.2706	26.7523	26.7959	100	26.2928	27.5775	27.4106	27.1982	27.7144	26.1923	27.0441	26.7674	27.775	27.4556	27.5866	27.3057	27.0122	26.6406	100	27.2062
HPX	Hemopexin	24.1974	25.6762	24.1358	23.6672	25.2784	24.2209	25.1084	25.3091	100	24.6992	25.8382	25.2656	25.3888	25.8454	24.2814	24.8615	24.5125	25.8442	25.1858	25.936	23.7239	25.2938	24.9381	100	25.1473
KLKB1	Plasma kallikrein	21.6652	19.7009	19.8563	19.8413	20.5009	20.5343	20.168	20.8329	100	20.3875	20.3876	20.2467	20.7407	20.7146	20.0083	20.8317	19.8605	20.5256	20.6055	20.263	20.5376	20.3636	20.3365	100	20.4171
C4BPA	C4b-binding protein alpha chain	20.0946	23.7705	22.6729	23.1241	22.7812	23.5104	22.5581	23.0619	100	22.6967	22.4811	22.5522	22.717	22.8336	23.1007	23.1605	21.593	22.0068	22.2146	21.8106	22.4893	22.6632	22.6776	100	22.4846
VTN	Vitronectin	23.7456	24.481	24.097	25.4813	23.6312	22.9734	23.6599	24.2097	100	24.0349	23.4229	23.6884	23.5225	23.8891	25.3282	23.7027	22.8822	23.8388	23.9935	22.5577	22.2718	23.682	23.3009	100	23.5447
CAT	Catalase	15.3188	20.708	20.719	19.0073	22.3356	20.7975	20.4569	20.5577	100	19.9876	19.4385	19.4081	21.8375	15.6241	18.9567	22.056	21.8414	19.2069	20.0048	15.936	22.1483	17.8539	19.8994	100	19.5547
APOB	Apolipoprotein B-100	21.1853	23.4083	23.8073	24.3173	23.8281	24.0761	24.5744	24.0908	100	23.661	22.4982	24.1428	24.1049	24.037	24.2636	23.9518	22.8757	23.4848	23.5092	23.2904	23.5599	24.4765	23.7483	100	23.6879
HRG	Histidine-rich glycoprotein	22.4627	22.3317	22.0191	21.7652	22.7985	22.9342	21.9328	22.4175	100	22.3327	22.778	22.3375	23.0475	23.8209	22.0037	22.9162	21.6456	22.4784	22.4543	23.6656	22.8751	23.0413	22.6455	100	22.7469
A1BG	Alpha-1B-glycoprotein	28.2616	24.914	24.3576	23.4076	24.7034	25.5643	25.0242	25.4378	100	25.2088	25.0807	24.6463	25.6557	25.9102	23.4992	24.704	23.7768	25.1181	24.6783	20.1974	25.2643	25.2566	24.9809	100	24.5207
KRT1	Keratin, type II cytoskeletal 1;	23.9284	21.2249	21.0548	19.2498	22.067	21.2479	19.4825	20.5685	100	21.103	20.8147	20.0395	22.675	24.4571	19.9204	18.7621	20.0589	21.2258	19.6964	20.5648	21.0675	22.7174	21.4012	100	21.0308
GAPDH	Glyceraldehyde-3-phosphate dehydrogenase	19.9637	22.2428	22.5416	21.8373	22.5045	21.5541	22.3471	21.605	100	21.8245	20.3748	22.2362	23.9523	19.9471	21.5666	21.4815	24.8182	20.2859	21.028	21.1128	22.1803	20.2183	21.9883	100	21.63
APOD	Apolipoprotein D	24.2484	22.1593	22.0419	21.5446	21.5759	21.9697	22.3411	22.5538	100	22.3043	21.4713	22.5183	22.2827	23.7942	21.8077	21.8161	20.9047	21.4536	20.9755	21.1401	21.7245	21.4241	20.973	100	21.7143
SERPING1	Plasma protease C1 inhibitor	26.2256	23.6544	23.396	22.4713	23.4178	23.7898	23.1619	23.65	100	23.7208	23.4302	23.0894	23.9566	23.8274	22.4923	23.3601	22.4243	23.1278	23.1207	23.3173	23.4103	23.263	23.3696	100	23.2453
CFI	Complement factor I	21.8549	22.2376	21.634	20.6788	21.1974	21.192	21.8508	22.4306	100	21.6345	22.1789	21.8883	21.9847	22.3165	21.0302	21.8939	20.9528	22.2207	22.132	21.889	22.2442	22.427	21.8444	100	21.9233
SERPINA7	Thyroxine-binding globulin	20.7576	20.2521	20.6293	19.512	20.3442	19.9715	20.9766	20.3805	100	20.353	21.1722	20.7613	20.6232	21.1473	19.977	20.5391	19.4943	20.71	21.0003	21.0774	21.3126	21.1432	20.7673	100	20.7481
SERPIND1	Heparin cofactor 2	21.1111	22.2228	22.181	21.8424	22.0513	21.6811	22.6556	22.4759	100	22.0276	22.0819	21.9077	22.561	21.7234	21.6736	22.4887	21.6081	21.6884	21.6448	21.6478	22.1596	22.1083	21.9009	100	21.938
BCHE	Cholinesterase	20.9195	18.2712	17.7956	16.4185	17.8943	17.1274	18.1351	18.6559	100	18.1522	17.736	18.0926	18.1454	17.9762	16.8243	17.3716	16.7917	17.4347	18.0614	17.5342	18.9294	18.255	18.3251	100	17.806
IGKV4-1	Immunoglobulin kappa variable 4-1	20.5743	23.217	23.5464	22.5935	23.5947	22.7161	23.1308	24.5029	100	22.9845	23.321	24.4293	23.7261	23.8935	22.6506	23.9669	23.3594	23.9516	23.6585	23.926	23.9184	23.4091	23.3354	100	23.6574
GSN	Gelsolin;	20.6937	22.4117	23.0442	22.9338	23.2486	22.71	22.7516	23.0263	100	22.6025	23.9799	23.7745	23.4656	24.1815	23.3062	23.8252	23.8767	24.3361	23.5147	23.7802	23.3608	23.4574	22.5448	100	23.6464
C2	Complement C2	21.253	21.8914	21.8282	20.7786	21.6796	21.8754	21.4379	21.8789	100	21.5779	22.3538	21.7959	21.6413	22.0883	21.0448	22.1777	21.3281	22.2582	22.2155	22.5926	22.3161	21.9054	21.7289	100	21.9574
ENO1	Alpha-enolase	18.6125	20.963	21.3874	20.9622	21.0471	19.6722	21.072	20.5169	100	20.5292	20.24	21.204	20.8209	19.8197	20.8667	20.3651	22.9566	19.6458	20.4771	21.1314	21.909	19.4521	20.9702	100	20.7583
PROS1	Vitamin K-dependent protein S	20.123	21.5723	20.7449	22.0216	21.3797	21.5481	20.9288	22.1885	100	21.3134	21.0105	21.0066	21.6534	21.5101	21.7929	21.7584	20.2339	21.2958	21.424	20.7968	21.2069	21.7956	21.5427	100	21.3098
C8A	Complement component C8 alpha chain	18.8221	21.3519	21.5575	22.2377	21.3759	21.7172	20.8341	21.5199	100	21.1771	21.02	20.8523	21.635	21.0167	22.1242	21.3878	20.8281	20.49	20.9308	20.2336	20.6732	21.4516	21.1497	100	21.061
C8B	Complement component C8 beta chain	18.9068	20.8938	21.1353	21.5327	20.8467	21.1776	20.7347	21.2739	100	20.8127	20.8872	20.5483	21.1001	20.6913	21.5575	20.8193	20.2535	20.2951	20.8947	20.2091	20.3609	21.2506	20.7393	100	20.739
COL1A2	Collagen alpha-2(I) chain	18.3045	18.7203	22.7721	22.2093	20.6771	21.6347	21.0778	18.6095	100	20.5006	20.7089	21.3881	21.232	20.577	22.3023	21.6818	22.1293	18.2665	21.2953	18.3418	18.7878	21.6084	23.0509	100	20.8746
SERPINA6	Corticosteroid-binding globulin	23.8898	21.7806	21.4531	20.204	21.3761	21.801	21.362	21.8328	100	21.7124	21.6712	21.8237	21.6853	22.3799	20.59	21.8517	21.1971	22.1887	21.4279	22.114	21.6438	21.3665	21.5481	100	21.6529
CD14	Monocyte differentiation antigen CD14	22.5161	18.6964	18.5559	19.0966	18.2209	19.602	18.9106	18.458	100	19.257	19.5072	18.6911	18.5727	20.1028	18.8621	18.7109	18.3583	19.8068	18.9355	20.9714	20.9023	18.7623	19.8916	100	19.3904
CFH	Complement factor H	22.7082	23.6771	23.3936	22.5964	23.4638	23.5932	23.0597	23.893	100	23.2981	23.378	23.4648	23.5136	23.3733	22.604	23.7542	22.6731	23.5055	23.4453	23.1306	23.5345	23.4268	23.173	100	23.3059
SERPINF2	Alpha-2-antiplasmin	22.1356	21.85	21.7822	21.9231	21.602	22.3133	21.8066	22.1666	100	21.9474	21.9594	21.9616	22.3784	22.143	21.9176	21.9197	21.4076	21.6843	21.586	21.8124	21.4855	21.747	21.6883	100	21.8224
C1S	Complement C1s subcomponent	19.7228	21.9517	21.5764	21.2218	21.2337	21.8338	20.9614	21.8327	100	21.2918	21.0354	21.3318	21.2378	20.8811	21.1912	21.5542	20.5592	20.6847	21.3639	20.1502	20.4163	21.4417	21.2272	100	21.0057
C4A	Complement C4-A	23.0593	24.895	24.7788	24.9076	24.3384	24.9104	24.3799	24.9593	100	24.5286	24.151	24.0891	25.2026	24.3553	24.7841	24.2713	23.209	23.9989	24.0361	23.7634	23.7148	24.6122	24.3605	100	24.196
C4B	Complement C4-B	22.6424	24.1212	22.9918	22.5315	22.7346	24.3078	22.9345	23.7101	100	23.2467	22.6914	23.4641	23.4689	23.4945	22.9978	23.9551	23.2601	23.17	22.6586	22.5595	22.1991	23.4789	23.0594	100	23.1121
CLU	Clusterin	29.2217	23.6281	24.1521	25.2512	23.9017	24.1341	23.5588	24.3165	100	24.7705	24.3412	24.1323	24.8949	25.2855	25.1665	25.1327	23.7962	24.6406	24.3304	23.9733	22.5335	24.1015	23.5148	100	24.2956
COL6A3	Collagen alpha-3(VI) chain	17.7193	17.9168	21.0115	23.6252	19.7212	20.3052	20.2988	20.1011	100	20.0874	21.5444	21.0756	19.0143	22.0286	23.3877	21.209	21.388	20.4664	21.8879	21.413	20.3764	20.524	21.7368	100	21.2348
EEF2	Elongation factor 2	15.5135	18.2481	18.2732	19.4663	16.8153	15.8236	16.742	16.3427	100	17.1531	15.3163	18.3486	16.2932	14.5666	18.1593	16.2316	21.3567	15.8612	16.8757	16.6396	17.1058	16.1735	18.9877	100	17.0704
C6	Complement component C6	18.7872	20.7981	21.4805	21.1489	20.597	21.2582	21.2153	21.755	100	20.88	20.9125	21.0112	21.2043	21.2027	20.85	21.5827	20.3522	20.247	21.0583	20.8713	21.0773	21.4736	21.0344	100	20.9906
LBP	Lipopolysaccharide-binding protein	17.8722	21.6145	21.3283	21.243	19.646	20.1378	21.1519	20.4141	100	20.426	20.2605	19.7244	20.0427	19.9024	21.1183	19.6387	18.0679	19.9362	20.0608	19.475	19.6542	20.8235	20.1207	100	19.9096
ORM2	Alpha-1-acid glycoprotein 2	26.5223	20.9694	20.632	19.5919	20.0451	21.9621	21.1497	21.8008	100	21.5842	20.1926	20.6661	21.1057	20.907	20.1149	21.0181	20.0913	20.3752	20.7606	19.9655	20.7067	21.02	21.22	100	20.6264
ITIH2	Inter-alpha-trypsin inhibitor heavy chain H2	22.302	23.1469	23.8877	24.574	24.2303	23.8154	23.4684	23.8975	100	23.6653	24.1254	23.8094	24.0142	24.1471	24.633	23.3827	23.0263	23.8104	23.8685	23.8912	24.3427	24.2818	23.9264	100	23.943
ITIH1	Inter-alpha-trypsin inhibitor heavy chain H1	21.8362	22.5882	22.885	22.9415	23.3041	22.6824	22.6971	22.9446	100	22.7349	23.5465	22.952	23.5404	23.8917	22.9078	22.9068	22.0678	23.0444	22.7969	23.1041	23.7133	23.077	22.7248	100	23.098
CPN2	Carboxypeptidase N subunit 2	24.2289	20.4187	20.7538	19.2263	20.9965	21.4231	20.5853	21.5978	100	21.1538	20.2651	20.9539	21.1335	21.2964	19.6184	20.5713	19.5437	20.1497	19.4566	20.6927	20.7674	20.4512	20.9632	100	20.451
AZGP1	Zinc-alpha-2-glycoprotein	27.5633	22.4101	21.2954	20.9214	21.7362	22.8375	21.8007	21.9041	100	22.5586	22.4623	21.8632	22.2984	23.3228	21.3796	22.4454	21.4115	22.1329	22.1297	22.9018	21.6246	21.233	21.8054	100	22.0777
PON1	Serum paraoxonase/arylesterase 1	21.0757	22.0085	22.2025	22.3665	22.104	21.88	21.6141	22.0896	100	21.9176	21.8381	22.4024	22.9314	22.1157	22.3714	22.2042	22.231	22.4545	22.1127	21.2395	22.9429	22.0731	22.2792	100	22.2459
PRDX2	Peroxiredoxin-2	17.297	21.7274	22.1083	20.4172	22.8523	21.0906	20.6906	20.4478	100	20.8289	20.0352	19.7673	23.9122	17.11	20.0526	23.6795	23.1905	19.7304	20.8442	17.2585	21.7754	18.43	19.5836	100	20.413
IGFALS	Insulin-like growth factor-binding protein complex acid labile subunit	16.322	18.9614	18.7177	20.4093	19.6812	19.104	18.9587	19.2762	100	18.9288	19.1605	18.8631	19.9166	19.7228	19.9433	20.0018	19.4729	19.7042	18.9692	19.5763	19.1733	19.4944	19.0882	100	19.4682
SERPINF1	Pigment epithelium-derived factor	19.1993	21.523	22.0022	22.9849	20.9511	21.6438	21.6488	22.085	100	21.5048	22.4006	21.8878	21.9525	22.9934	23.0872	21.3558	21.7107	21.7295	22.2972	21.7662	21.6984	21.728	22.1956	100	22.0618
AFM	Afamin	24.4715	19.3782	17.1425	17.2737	18.1864	19.1044	18.565	18.2229	100	19.0431	18.5524	17.9336	19.7966	18.259	17.2621	17.7983	17.8599	18.6668	18.1296	19.0824	18.4867	18.6077	17.8901	100	18.3327
LUM	Lumican	25.2588	20.2879	19.9375	21.5174	20.4465	19.9001	20.1561	19.9124	100	20.9271	21.0762	20.2228	20.9164	21.6682	21.37	20.8876	22.8773	20.5189	20.5507	20.7644	20.3695	20.2497	20.1076	100	20.8907
PLTP	Phospholipid transfer protein	21.1838	17.4871	19.6267	19.0892	18.2808	19.7281	19.561	19.4773	100	19.3043	20.2679	19.8988	18.5874	21.0423	19.4735	18.8237	19.7489	20.5769	19.735	20.7028	20.3458	18.462	20.6399	100	19.8696
HBB	Hemoglobin subunit beta	26.7193	26.8903	26.9342	26.3841	28.2716	26.1011	25.232	26.1529	100	26.5857	25.7866	25.0389	28.6076	23.187	26.4292	28.6555	27.3235	25.0779	26.3616	21.2249	26.2404	24.079	25.1659	100	25.6291
HBA1	Hemoglobin subunit alpha	25.4912	26.7882	25.8198	25.9406	27.4744	25.6743	24.4394	24.2989	100	25.7409	24.7651	23.7986	27.9291	22.5978	25.9791	27.369	26.6115	23.6888	25.3063	19.8998	25.1002	22.7655	23.7347	100	24.5804
GPLD1	Phosphatidylinositol-glycan-specific phospholipase D	19.3978	18.0376	19.6226	18.2227	18.9056	18.652	19.2582	19.1225	100	18.9024	19.4215	19.1644	19.6672	19.3512	18.4394	19.7184	18.7794	18.3412	19.1718	19.0595	19.146	19.0068	19.3217	100	19.1222
ITIH3	Inter-alpha-trypsin inhibitor heavy chain H3	20.2513	21.7887	22.4996	20.5774	20.8977	21.2355	20.5893	21.0317	100	21.1089	20.7762	21.8586	21.0226	21.4556	20.4874	20.8583	19.1074	20.0601	20.0531	21.1355	21.4538	21.4482	21.258	100	20.8442
LGALS3BP	Galectin-3-binding protein	21.7509	19.7476	19.2054	17.5461	18.249	18.6172	18.5812	18.996	100	19.0867	18.115	18.8029	18.3548	19.0726	17.8564	19.0447	17.8767	17.6793	18.7049	19.3766	18.7822	18.8271	19.0849	100	18.5829
ITIH4	Inter-alpha-trypsin inhibitor heavy chain H4	22.8278	24.0383	23.932	22.6613	23.7358	24.1719	23.6772	24.0665	100	23.6389	23.7676	23.8024	23.9425	23.5141	22.8278	23.8961	22.7805	23.4442	23.2856	22.9061	23.4076	23.7924	23.6967	100	23.4664
POSTN	Periostin;	15.1681	19.8161	22.2233	21.7184	21.0686	21.5084	21.3743	19.78	100	20.3321	22.0122	21.9731	18.4742	22.0332	21.9204	21.7118	22.2801	17.7226	22.6397	20.4678	20.5316	21.7756	22.8486	100	21.2608
TGFBI	Transforming growth factor-beta-induced protein ig-h3	15.9487	18.2325	20.3664	22.2283	19.7254	20.8269	20.3847	20.2765	100	19.7487	21.1851	20.9245	19.1654	20.4461	22.149	21.1819	20.135	20.8672	21.1528	21.6595	21.4855	20.998	21.8568	100	21.0159
PRG4	Proteoglycan 4	21.8899	19.2585	21.2088	23.2835	19.1012	20.3975	19.6048	20.8964	100	20.7051	23.2204	22.1378	22.2769	23.8373	23.193	22.3487	22.3727	24.0474	22.6595	23.8753	19.4533	21.3119	18.4747	100	22.2468
PGLYRP2	N-acetylmuramoyl-L-alanine amidase	23.9971	19.4755	20.5236	20.6652	20.9917	20.889	21.6886	21.4669	100	21.2122	21.7213	21.5443	21.543	21.8502	20.5829	20.8061	20.9678	21.7139	21.8568	21.4047	21.4472	21.3871	21.4552	100	21.4062
SERPINA10	Protein Z-dependent protease inhibitor	18.1494	20.9699	19.3434	21.7253	19.6403	19.3104	18.1822	19.2214	100	19.5678	19.5658	18.6421	19.6179	19.3679	21.6853	19.1578	19.1333	19.046	20.1603	19.8861	19.6382	20.2259	20.5878	100	19.7473
	Immunoglobulin lambda variable 3-21	23.5232	21.7323	23.8055	20.4996	21.5894	22.4193	21.3128	22.3212	100	22.1504	22.6696	20.8088	22.2534	22.0455	21.057	22.2704	21.951	21.6246	20.8854	21.5909	22.2457	22.0191	21.1951	100	21.7397
HGFAC	Hepatocyte growth factor activator;	20.5266	16.5221	18.8664	17.0154	18.8207	17.8986	17.1575	18.4137	100	18.1526	19.143	18.7487	19.8106	19.1304	17.5558	19.4494	18.8634	18.2074	18.1863	18.1826	18.2371	18.1601	17.6465	100	18.5632
	Immunoglobulin lambda variable 3-19	20.3201	20.0874	19.1571	17.8856	19.543	18.3608	19.731	19.4531	100	19.3173	20.4798	19.5167	18.4499	19.5052	17.8264	19.3745	19.0181	19.0527	19.7541	19.6806	17.7402	18.7769		92.3077	19.0979
HBD	Hemoglobin subunit delta	22.5304	22.9268	22.7249	21.357	24.1773	21.762	20.7781	20.9365	100	22.1491	21.2376	20.33	24.8879	17.8694	21.2601	24.7545	22.8178	19.188	21.0645		21.0882	18.9747	19.7736	92.3077	21.1039
PZP	Preg cy zone protein	16.8062	21.1725	20.9418	21.5267	19.6299	21.2988	20.1361	22.4592	100	20.4964	22.1067	20.2278	22.2805	21.7292	21.3651	22.1337	16.9723	20.879		21.146	20.1773	22.4292	20.4479	92.3077	20.9912
PFN1	Profilin-1	19.9823	20.7418	20.9323	20.4456	20.7582	20.4875	21.5489	20.1229	100	20.6274	19.1123	20.3952	20.0263	18.8007	20.102	19.8408	22.2617	19.3924	19.5567	20.312	19.7947		19.814	92.3077	19.9507
VWF	von Willebrand factor	17.5927	19.3879	19.138	19.2327	17.8902	20.1066	18.2411	18.5457	100	18.7669		17.6952	19.4703	16.1576	19.1265	17.9749	16.9634		17.4757		18.5619	17.9714	19.4302	76.9231	18.0827
SELENBP1	Methanethiol oxidase	17.3146	17.8431	18.7718	15.8971	20.3721	15.2678	15.9028	15.6419	100	17.1264	16.704	16.0434	20.7208		14.7371	20.751	21.4692	15.6638	16.4969		17.8751		16.0346	76.9231	17.6496
LPA	Apolipoprotein(a)	19.1957	17.6849	15.6328	17.5157	17.7801	21.0119	20.3023	17.7858	100	18.3637	19.6814	17.566	16.7439		17.4548			20.6963		19.5839	20.8995	20.1716	21.7127	69.2308	19.39
MPO	Myeloperoxidase	18.8137	17.1394	17.2722	19.127	19.7296	20.5092	21.6833	20.4184	100	19.3366		18.44		14.2132	18.587		15.0432				19.3168		18.1428	46.1538	17.2905
LCN2	Neutrophil gelatinase-associated lipocalin	20.1215	18.5139	17.7737	16.1126	19.8717	18.9029	20.5534	20.1523	100	19.0002		16.9055				17.0049					18.3935		17.5276	30.7692	17.4579
FCN3	Ficolin-3		19.7281	19.9333	18.3861	19.2765	20.3356	20.036	19.9883	87.5	19.6691	19.2424	19.6654	20.1767	19.1954	18.2368	20.2418	19.2253	18.9689	19.3731	18.9259	19.9931	19.8893	19.9435	100	19.4675
PGK1	Phosphoglycerate kinase 1		19.456	19.5303	19.4338	19.8136	18.8682	19.6852	18.6204	87.5	19.3439	18.1962	19.4488	20.0605	17.2114	19.1125	19.3184	21.412	18.3157	18.6333	19.5052	19.8566	17.6282	19.3846	100	19.0833
CFD	Complement factor D		18.6948	17.6462	18.537	17.5883	17.602	18.1177	18.9202	87.5	18.158	20.558	19.0725	18.1495	21.3992	19.2524	19.4351	18.4877	21.0776	19.6967	20.8068	19.1224	18.7268	17.741	100	19.502
CA1	Carbonic anhydrase 1		22.6152	23.1374	19.8658	24.2682	21.1481	20.887	21.6618	87.5	21.9405	21.5922	20.9385	23.6012	16.7502	19.768	24.5077	22.9955	20.8242	22.0335	17.2267	22.5796	19.8501	20.5744	100	21.0186
	Immunoglobulin kappa variable 3-20		24.0711	25.7657	24.1588	25.0152	22.5993	24.7083	25.3225	87.5	24.5201	24.9894	25.6885	24.5563	25.2133	24.6398	25.3369	24.5242	25.1098	24.3211	24.7577	25.0006	24.6264	24.574	100	24.8722
COL3A1	Collagen alpha-1(III) chain		19.2997	22.6762	19.3658	20.1335	22.2389	21.5823	19.5627	87.5	20.6941	20.4126	21.0812	17.8136	20.585	19.4384	21.3973	20.8143	19.512	21.2014	19.3201	20.1296	21.2312	22.8114	100	20.4422
FTH1	Ferritin heavy chain		17.8379	19.2815	18.7822	19.185	17.9195	18.3144	15.4855	87.5	18.1152	17.4597	17.94	19.1498	16.5232	18.3766	17.5353	22.8519	16.9209	17.4393	19.463	21.8134	16.317	19.4933	100	18.5603
ALDOA	Fructose-bisphosphate aldolase A		20.1628	21.0025	19.3883	20.5184	20.6091	20.744	20.487	87.5	20.416	20.1492	21.3166	23.2421	19.6205	19.502	20.192	23.4102	19.9978	20.1385	21.2957	21.7556	19.3468	20.6505	100	20.8167
SERPINA5	Plasma serine protease inhibitor		17.4915	18.3245	19.1896	19.9916	18.8899	19.0875	19.446	87.5	18.9172	19.4621	19.0356	19.0946	19.0178	19.4574	20.2767	18.959	19.3898	19.523	18.9682	18.3702	19.4773	18.3865	100	19.186
CLEC3B	Tetranectin;		19.2261	18.9084	19.6289	18.7445	16.8901	18.3405	18.9024	87.5	18.663	20.3405	19.9324	19.529	21.1931	20.1178	19.3726	18.5034	20.0003	19.4408	20.4415	18.8084	19.109	18.0641	100	19.6041
APOA4	Apolipoprotein A-IV	25.4211		18.4545	19.4312	19.226	19.0707	19.5554	19.2207	87.5	20.0542	19.2446	20.3613	19.9192	20.4723	19.7213	20.5123	19.7065	18.44	19.2928	18.5994	17.8762	18.4443	17.9893	100	19.2753
GPI	Glucose-6-phosphate isomerase		19.8879	20.195	17.5293	20.0175	19.8336	20.7086	19.867	87.5	19.7198	17.4205	20.0265	20.4663	16.7993	17.5829	19.0484	21.9249	17.3771	18.49	18.6099	20.5421	17.1252	19.1232	100	18.8105
LDHB	L-lactate dehydrogenase B chain		18.6922	18.4155	16.9377	18.9129	17.8956	17.9958	18.3052	87.5	18.165	16.9516	17.7192	20.0136	16.7932	16.8959	18.1555	20.4416	16.4442	17.5025	17.1505	19.7869	17.4882	19.007	100	18.0269
C8G	Complement component C8 gamma chain		21.9544	22.3837	22.2268	21.6768	20.598	20.8852	21.3873	87.5	21.5875	21.8104	21.4992	21.9501	21.1527	22.2924	21.5834	20.6151	20.5096	21.2559	20.5518	20.4506	21.3501	20.8904	100	21.224
HSP90AA1	Heat shock protein HSP 90-alpha		18.6337	19.3663	19.47	19.1998	16.9018	18.4634	18.2675	87.5	18.6147	18.2789	19.3511	18.1702	17.05	19.1312	18.6835	21.4728	17.8123	18.2474	18.974	19.3926	17.1302	19.2324	100	18.6867
VIM	Vimentin		19.2176	18.9532	21.1122	20.2425	18.0277	18.316	19.0592	87.5	19.2755	19.1479	19.347	19.2666	18.2322	20.9247	19.2764	22.5562	18.6677	18.1307	19.5212	19.9257	16.8328	19.0596	100	19.2991
C7	Complement component C7		21.8095	23.4823	22.2102	22.176	22.2265	21.9408	21.8044	87.5	22.2357	22.1319	23.1966	21.9088	22.8013	21.9578	22.4869	21.489	21.758	21.9635	22.5232	21.7115	22.5402	21.5765	100	22.1573
COL6A1	Collagen alpha-1(VI) chain	16.4717		18.4788	22.513	17.7935	18.7559	18.8728	17.3724	87.5	18.6083	19.0103	18.3769	16.0566	19.051	22.0198	19.6984	18.0016	16.4799	19.7625	18.7699	18.9647	19.8507	20.6193	100	18.974
LCP1	Plastin-2		18.9406	19.2924	17.5923	18.7588	19.914	20.447	19.856	87.5	19.2573	19.0729	19.1514	18.2575	18.7804	17.8387	16.9448	19.8646	18.8281	18.3055	20.1552	20.7092	17.7538	19.5083	100	18.8593
PKM	Pyruvate kinase PKM		20.5191	20.7768	21.1968	20.9069	19.0297	20.53	20.1727	87.5	20.4474	20.1874	21.1103	21.3459	19.3727	21.3209	19.9177	22.7975	19.883	20.0567	20.8656	20.171	19.1608	20.2426	100	20.4948
CPN1	Carboxypeptidase N catalytic chain		19.958	19.7975	18.3867	19.8299	19.8796	19.4353	20.2744	87.5	19.6516	19.4332	19.4486	19.5857	19.6015	18.9226	19.7038	18.4294	19.1946	19.6408	19.6992	20.1741	19.8513	20.0475	100	19.5179
GPX3	Glutathione peroxidase 3		19.5165	19.3107	19.9312	20.2717	19.6842	19.5321	19.5625	87.5	19.687	19.1045	20.1336	19.8673	19.5605	19.7515	19.1078	19.2175	20.1843	19.1781	20.7346	20.0162	19.9026	20.034	100	19.7533
FBLN1	Fibulin-1;		18.9965	20.1046	20.3462	18.8346	18.953	17.7744	19.1038	87.5	19.159	18.6984	19.6078	19.2145	19.0382	20.3735	19.475	18.9374	18.3134	19.0246	18.1944	18.6172	18.9029	18.8553	100	19.0194
CFL1	Cofilin-1		20.3894	20.4645	18.8964	20.1255	19.6984	20.0066	19.9024	87.5	19.9262	18.4508	20.1823	20.0682	17.0509	19.3453	19.0766	22.1856	18.0836	19.2573	19.4292	18.5621	17.5207	19.474	100	19.1297
TNC	Tenascin		16.1848	20.0449	21.0348	19.5334	18.9059	18.5982	19.4876	87.5	19.1128	19.9559	20.2644	16.0616	18.9664	21.0499	19.5958	19.5537	17.1766	20.0159	19.4442	18.0468	18.9965	19.1737	100	19.1001
MSN	Moesin		19.2952	19.3165	20.377	19.4774	18.7499	19.7603	18.9163	87.5	19.4132	18.9827	19.6063	18.1821	17.8687	20.0276	17.9852	21.1021	18.5581	18.8949	19.716	20.156	17.6629	19.2841	100	19.079
SERPINA4	Kallistatin		17.2723	18.7409	20.1865	20.4798	20.2355	20.1953	20.2943	87.5	19.6292	21.1229	20.5327	20.9473	20.9898	20.426	20.5188	20.3636	20.4986	20.8957	21.01	20.5424	20.3935	20.0502	100	20.6378
SAA4	Serum amyloid A-4 protein	24.7095		22.8633	21.0311	21.6264	22.2982	22.0005	22.3515	87.5	22.4115	21.0573	21.632	21.4007	21.3507	20.6362	22.4731	20.1234	21.1547	21.785	21.1925	21.4494	21.8717	21.7699	100	21.3767
MYH9	Myosin-9		18.8048	19.542	19.8709	19.9109	19.4236	19.6858	17.7148	87.5	19.279	16.9159	19.1724	18.0863	15.6263	19.9509	17.2343	21.6423	15.1566	17.5178	18.1765	18.3474	15.0814	19.4177	100	17.8712
COMP	Cartilage oligomeric matrix protein	19.3041		20.0109	20.0091	18.8158	18.7773	16.6679	17.7644	87.5	18.7642	21.3755	20.1038	18.3676	20.8542	20.4366	20.5037	21.1693	21.9781	22.4063	21.023	19.0511	20.2384	21.0858	100	20.661
SEPP1	Selenoprotein P	25.0313	18.5205	17.6325	18.5954	18.8906		18.2853	19.712	87.5	19.5239	18.5376	18.9218	19.1908	18.6891	19.4398	19.1182	18.6956	19.0582	18.7386	19.6975	18.4441	19.0604	19.0546	100	18.9728
TPI1	Triosephosphate isomerase		20.8917	21.3335	18.883	20.9301	19.7132	19.9334	19.8594	87.5	20.2206	19.1654	20.7552	22.403	18.2297	18.7223	20.7551	22.8897	18.5751	19.6262	19.2773	20.638	18.4069	19.7602	100	19.9388
PPIA	Peptidyl-prolyl cis-trans isomerase A		19.7282	20.6585	19.855	20.1513	17.6984	18.5853	19.1365	87.5	19.4019	18.5482	20.2419	20.0242	18.1495	19.6221	20.2041	22.7421	18.4355	19.4467	19.5921	19.1029	17.6951	19.5982	100	19.4925
EEF1A1P5;EEF1A1	Putative elongation factor 1-alpha-like 3;Elongation factor 1-alpha 1		20.0891	21.0741	21.5491	20.1338	16.8144	18.782	19.6323	87.5	19.725	19.0589	20.8865	19.403	18.2032	20.9459	19.8215	22.9634	18.7366	19.6915	19.7417	19.1738	18.6803	20.5154	100	19.8324
CPB2	Carboxypeptidase B2		19.1923	19.1208	19.2263	19.4141	19.2024	18.928	19.5749	87.5	19.237	18.4706	18.5731	19.471	18.4955	18.999	19.6202	19.5242	18.9215	19.2501	18.9716	18.6281	19.7133	19.2365	100	19.0673
GSTP1	Glutathione S-transferase P		19.2111	19.6872	18.9757	18.1328	16.4077	19.1805	18.2011	87.5	18.5423	16.6358	19.0045	18.0111	17.091	19.0071	17.7286	21.7635	17.036	17.5534	18.05	17.482	16.1696	17.8926	100	17.9558
VCL	Vinculin		17.5894	16.9744	15.1086	16.5243	16.0532	18.053	15.8402	87.5	16.5919	16.6241	17.1475	17.8203	15.3635	15.6248	16.8168	20.9441	15.9416	15.3958	17.0824	18.3887	14.8792	16.7842	100	16.8318
PGD	6-phosphogluconate dehydrogenase, decarboxylating		19.2361	18.7482	18.7231	19.96	19.4184	20.9481	19.2712	87.5	19.4721	17.3103	18.6524	17.3778	15.8299	18.5299	17.1819	20.1823	16.715	17.187	18.2916	19.0421	15.4378	18.0732	100	17.6778
YWHAZ	14-3-3 protein zeta/delta		18.4479	18.4064	19.4188	18.7277	19.9439	18.6452	18.6386	87.5	18.8898	17.9387	18.5748	18.5677	17.3777	18.9745	18.5023	20.7221	18.026	18.1729	18.5999	19.3321	18.2935	18.467	100	18.5807
CAP1	Adenylyl cyclase-associated protein 1		19.1306	18.7619	18.888	18.6445	18.0863	20.0869	18.5955	87.5	18.8848	17.7346	18.4521	18.0678	15.5892	18.6069	17.6626	20.972	18.0308	17.5185	19.3913	18.2526	16.5288	18.4513	100	18.0968
TLN1	Talin-1		16.7264	16.535	17.4978	15.2694	15.7495	17.1974	15.7873	87.5	16.3947	15.1257	16.5843	17.7414	14.1929	17.443	14.8969	20.5673	14.6421	15.5087	16.5051	16.0878	14.3408	16.6402	100	16.1751
CA2	Carbonic anhydrase 2		20.2173	19.9711	17.8342	20.9003	19.4822	18.6833	19.2788	87.5	19.481	18.5747	18.4126	21.16		17.4349	20.9755	20.9406	18.2062	19.1599	14.9821	19.1799	17.1283	17.8235	92.3077	18.6648
HSPA8	Heat shock cognate 71 kDa protein		18.8098	19.5639	19.148	18.8447	18.3032	18.166	18.5085	87.5	18.7635	17.9334	19.0634	18.6348	16.9488	19.1026	18.3699	21.552	17.9196	18.1487	18.5038	18.1666		18.6608	92.3077	18.5837
COL5A1	Collagen alpha-1(V) chain	19.1407		18.2941	18.725	17.5886	19.0714	18.9168	17.7968	87.5	18.5048	18.9937	18.0456		19.083	18.9278	18.8128	19.0847	16.9331	19.8873	18.3472	18.438	18.989	20.1163	92.3077	18.8049
FLNA	Filamin-A		15.7042	17.6623	19.2368	17.5636	16.0793	18.2413	16.5935	87.5	17.2973	17.2781	17.9933	18.1229		19.2199	15.2042	20.5659	17.1625	17.4759	19.9781	19.0723	16.4512	18.0198	92.3077	18.0453
TKT	Transketolase		19.382	19.2566	16.6857	19.4299	18.9683	20.5573	19.6716	87.5	19.1359	16.4513	19.0957	18.3575		17.5416	16.2949	20.4871	15.9722	16.808	18.4733	20.2288	16.2584	18.5728	92.3077	17.8785
IGHV6-1	Immunoglobulin heavy variable 6-1	21.1458	20.5221	21.708	21.5429	21.9654		23.3195	23.6003	87.5	21.972	22.2446	22.084	21.9444	22.5669	20.6851	23.3691	21.7933	22.5242	22.5143	22.6803	22.774		23.1245	92.3077	22.3587
HSPA1A;HSPA1B;HSPA1L	Heat shock 70 kDa protein 1A;Heat shock 70 kDa protein 1B;Heat shock 70 kDa protein 1-like		17.5507	17.7405	18.3213	18.0644	16.3486	18.4114	18.3618	87.5	17.8284	16.384	17.8656	18.1553	16.2262	17.9558	17.7442	20.1154	16.2969	16.7663	17.9448	17.4389		17.6291	92.3077	17.5435
SHBG	Sex hormone-binding globulin		18.9375	19.089	17.9708	18.8272	20.3881	19.4832	19.5326	87.5	19.1755	19.5534	20.5621		20.9173	18.858	18.2519	17.5934	19.2559		20.9625	20.23	19.768	20.5024	84.6154	19.6777
BLVRB	Flavin reductase (NADPH)		19.7483	20.252	21.0834	20.5322	17.3438	18.1453	18.4843	87.5	19.3699	18.4805	18.0538	20.4859	17.9096	20.9832	20.9353	20.5139	17.9081	19.0371		17.6801		17.8087	84.6154	19.0724
ACTN1	Alpha-actinin-1		17.6357	17.839	18.8493	18.758	19.4724	19.8792	18.2654	87.5	18.6713	15.8973	17.4332	16.8937		18.6154	16.7013	20.6483		16.4961	16.2985	18.3992	14.7398	17.5329	84.6154	17.2414
GDI2	Rab GDP dissociation inhibitor beta		17.854	17.6513	17.2957	17.5768	14.7058	17.9451	15.7099	87.5	16.9627	16.7028	16.4329	17.1656		16.8433	15.6155	20.185	16.1945	16.7588	16.5624	18.7355		17.4687	84.6154	17.1513
	Immunoglobulin lambda variable 1-47;Immunoglobulin lambda variable 1-44	22.5342		23.2177	21.8665	21.0965	21.8552	21.541	21.2875	87.5	21.9141	22.1615	23.6081	22.5393	23.0657		22.0129	21.9627	22.902	22.4319	19.6304		22.2227		76.9231	22.2537
P4HB	Protein disulfide-isomerase		17.248	18.324	18.6989	17.8995	17.7695	17.4828	17.0902	87.5	17.7876		17.9391	17.0082	15.2292	18.2822	17.2521	20.5386		17.3485	16.4665	17.9291		18.2244	76.9231	17.6218
THBS1	Thrombospondin-1;		17.7496	17.2174	20.055	18.5995	18.8396	18.0886	16.292	87.5	18.1202	16.6224	16.343	18.3997	16.5111	19.8898	17.9144	16.8529		17.7353			16.4308	17.7822	76.9231	17.4482
SERPINB1	Leukocyte elastase inhibitor		17.3497	17.9504	16.9573	19.809	19.9058	20.8221	20.0305	87.5	18.975	16.8623	18.6195			16.5692	15.6435	17.2757	15.7648	16.7108	16.9474	19.5692		17.856	76.9231	17.1818
CLTC	Clathrin heavy chain 1		17.4721	18.4632	19.3237	17.4096	15.2646	17.6718	16.8101	87.5	17.4879	16.3675	18.5921	16.0115	15.4804	18.8896	16.5989	21.7444			17.2276	16.5419		19.198	76.9231	17.6652
ACTR2	Actin-related protein 2		18.5813	17.6731	18.0109	17.8582	17.9446	18.715	17.1062	87.5	17.9842	17.256	17.6549	17.5588		17.3011	16.7428	20.6807			17.9885	18.4017		17.9543	69.2308	17.9488
CRP	C-reactive protein	19.3387	24.2197	24.0479	21.1689		22.1627	19.4762	20.669	87.5	21.5833	17.5036	19.892		17.457	20.9708	18.9066		19.2695			17.4752	18.6543	21.454	69.2308	19.0648
HIST1H4A	Histone H4		17.3053	18.5955	21.7822	20.8493	22.0735	22.5394	20.4764	87.5	20.5174	18.457	18.3785		18.6729	21.3244			17.9224		18.5677	20.1989		18.1802	61.5385	18.9627
PPIB	Peptidyl-prolyl cis-trans isomerase B		17.0128	18.0954	20.1252	17.9279	16.3991	16.4394	15.9199	87.5	17.4171		17.5529			19.4276	16.9178	19.4973	16.7228	17.291		17.0259		17.5875	61.5385	17.7528
TALDO1	Transaldolase		18.2995	17.7293	17.2282	18.4364	18.2738	19.3599	18.0413	87.5	18.1955		18.1854	17.3599		17.4694		19.8789		17.2597	17.7033	19.1368		17.3137	61.5385	18.0384
LTF	Lactotransferrin		18.3142	18.1885	19.4284	21.2782	21.3568	22.9665	21.8265	87.5	20.4799		18.6835	15.913	15.5782	18.8744		15.8061				20.1046		19.6027	53.8462	17.7947
S100A9	Protein S100-A9	20.2975	20.5275	19.9987		21.3735	23.3968	23.29	21.8684	87.5	21.536		20.2193	17.2299				16.041		17.4912		22.5001		20.1819	46.1538	18.9439
PNP	Purine nucleoside phosphorylase		17.9152	16.9309	16.5209	18.5535	17.4308	17.7695	16.257	87.5	17.3397		16.4044	18.9545			18.4228	19.3331				17.319		17.1277	46.1538	17.9269
ACTN4	Alpha-actinin-4	18.7075	17.638	18.7806	18.4399	17.7817		18.708	18.3599	87.5	18.3451		18.5906			18.746	17.4944	20.1668				18.0572		17.8185	46.1538	18.4789
ARHGDIB	Rho GDP-dissociation inhibitor 2		19.9018	19.37	19.4951	20.1041	19.9174	20.2884	19.4859	87.5	19.7947	18.224	19.8024			19.4825		20.0469				18.82		17.9079	46.1538	19.0473
MYL12A;MYL12B;MYL9	Myosin regulatory light chain 12A;Myosin regulatory light chain 12B;Myosin regulatory light polypeptide 9	20.2454		17.9409	17.6793	18.4106	17.5463	17.6	18.3595	87.5	18.2546	17.4209		17.6508		17.9425	17.6399	19.807						17.4543	46.1538	17.9859
S100A8	Protein S100-A8		20.8182	20.4328	17.9069	21.8532	22.4279	22.3513	22.1278	87.5	21.1312		19.0532	17.2235			17.4429					20.837		19.8603	38.4615	18.8834
IGKV3D-11	Immunoglobulin kappa variable 3D-11;Immunoglobulin kappa variable 3-11			25.591	23.6758	24.2494	23.6644	24.3663	25.1037	75	24.4417	24.8476	25.1434	24.9053	24.8492	23.7925	24.7766	24.1071	24.9081	24.1547	24.8644	24.6529	25.0444	23.8883	100	24.6103
	Ig-like domain-containing protein (Fragment)	20.5848		17.3972	18.8438	18.7995		19.0376	20.056	75	19.1198	18.5687	19.5561	19.2127	19.7067	18.7598	19.8121	18.6289	19.2342	20.1482	19.2131	19.0272	18.5416	18.5282	100	19.149
ANXA2;ANXA2P2	Annexin A2;Putative annexin A2-like protein	16.0511		18.1378	20.6621	16.224		15.1326	16.9067	75	17.1857	18.7645	17.9671	17.8789	18.5812	20.4643	18.1239	21.4759	18.7261	18.4566	20.8026	20.0166	17.8304	18.3185	100	19.0313
VCAN	Versican core protein			18.958	19.2901	18.5195	18.2338	18.129	16.9906	75	18.3535	20.0813	19.0452	17.7399	21.9548	19.4483	18.8397	20.4648	19.4041	19.9046	20.2495	18.53	17.5879	20.1012	100	19.4886
EFEMP1	EGF-containing fibulin-like extracellular matrix protein 1			18.4186	18.5547	17.3217	18.6965	17.6739	17.4226	75	18.0147	19.7675	19.0674	17.6756	20.1584	19.2216	18.7782	18.1973	19.8861	18.5764	19.5491	17.6765	17.4613	18.6039	100	18.8169
PCOLCE	Procollagen C-endopeptidase enhancer 1			20.689	20.5965	18.9427	19.2908	18.8021	19.1085	75	19.5716	21.0585	20.2804	18.5597	20.9792	20.7729	19.9665	20.1155	20.1737	20.7897	19.9655	19.2301	19.4754	20.666	100	20.1564
CRTAC1	Cartilage acidic protein 1			18.9216	19.4461	17.7297	15.9351	16.3902	20.5866	75	18.1682	23.0867	20.627	20.4719	22.4391	20.2552	19.9593	19.7432	23.8735	21.368	23.6888	19.7352	20.3083	17.1744	100	20.9793
QSOX1	Sulfhydryl oxidase 1			18.858	19.1528	18.3525	18.8714	19.1181	18.6066	75	18.8265	18.6817	19.0994	18.7778	18.8134	19.0086	19.2015	18.7035	18.4232	18.7807	18.6735	18.3459	18.3863	19.3255	100	18.7862
IGKV1-5	Immunoglobulin kappa variable 1-5		22.1775	23.7356	22.5075	23.4854		23.301	23.4798	75	23.1145	23.2275	23.7662	23.7105	24.0115	22.4991	23.5505	22.4822	23.1702	23.0993	22.9123	23.1392	23.0598	22.4553	100	23.1603
KRT9	;Keratin, type I cytoskeletal 9	22.1036		18.1094	15.5287	20.0137	18.731		17.6416	75	18.688	16.5703	16.9532		17.4494	15.9583	14.7436	15.3445	18.2395	15.5106	18.5477	18.8949	20.7125	17.4005	92.3077	17.1937
ANXA1	Annexin A1			18.0108	18.3965	18.4695	18.9447	19.1016	18.3617	75	18.5475	17.8305	18.0889	17.1546	17.1713	18.2766	17.4813	19.3505	17.0157	17.0718	19.0177	19.1009	16.6548		92.3077	17.8512
HSP90AB1	Heat shock protein HSP 90-beta		18.54	19.4415	18.7842	18.0752		17.4982	16.3905	75	18.1216	16.9788	18.6486	17.1902		18.0194	17.5024	20.9169	15.9679	17.0021	17.5977	18.7932	15.8124	18.373	92.3077	17.7335
GSTO1	Glutathione S-transferase omega-1		17.9308	17.5065	18.2431	18.8076		16.7233	17.5569	75	17.7947	17.3934	17.4684	18.7454		18.3277	18.1142	19.4778	17.9711	17.602	18.2102	19.3031	17.172	17.9879	92.3077	18.1478
HSPG2	Basement membrane-specific heparan sulfate proteoglycan core protein			17.8526	19.0593	16.6186	17.5542	16.9324	17.0325	75	17.5083	18.2032	18.1057		17.631	18.6938	18.1087	17.5628	15.7034	19.12	17.5378	16.564	17.955	19.1559	92.3077	17.8618
F13B	Coagulation factor XIII B chain		19.4514	19.2989	18.7146	19.1674		18.7016	19.1599	75	19.0823	18.9752	19.1211	19.467	19.188	18.2292	19.3062		19.0858		19.0134	19.5646	19.1403	19.4569	84.6154	19.1407
TUBB	Tubulin beta chain		19.6209	20.0219	19.2374	18.6319		17.793	17.7393	75	18.8407		19.0337	17.5178		19.1198	18.1955	22.4267	15.5765	17.6779	16.8823	17.13	15.7579	19.0427	84.6154	18.0328
LTA4H	Leukotriene A-4 hydrolase		16.5987	17.202		17.6674	16.6738	18.4564	18.0779	75	17.446	17.4937	17.5494	16.7961	16.5357	15.3032		19.3532	17.906	17.3974	20.3188	19.1146		16.1483	84.6154	17.6288
HSP90B1	Endoplasmin		16.9031	18.3036	18.3756	16.4728	15.7062	15.3208		75	16.847	16.2573	16.9791	15.4139	15.7435	18.0619	16.9996	20.1942		15.3638	16.4064	17.4379		17.5322	84.6154	16.9445
ARF3;ARF1;ARF5	ADP-ribosylation factor 3;ADP-ribosylation factor 1;ADP-ribosylation factor 5		17.7283	17.6754	19.6577	17.9712		17.8013	17.2314	75	18.0109	17.0105	17.8088	17.388	16.9749	19.4691	17.186	21.1408		18.0781	17.5702	17.4769		18.2295	84.6154	18.0303
ABI3BP	Target of Nesh-SH3	21.8773		16.8284	19.0082	17.2318		16.0893	17.6098	75	18.1075	18.6178	17.744		19.708	18.9921	18.4273	19.1304	18.268	19.1201	19.4	16.9244		18.3767	84.6154	18.6099
PGAM1	Phosphoglycerate mutase 1		20.9338	20.9778	18.6291	19.8516		20.0339	19.7202	75	20.0244	18.6645	19.7753	22.6316	18.5377	19.6472	19.5079	23.0139		19.4302	19.6365	21.6981		19.3528	84.6154	20.1723
IGHD	Immunoglobulin heavy constant delta			19.7773	19.1281	20.416	22.806	17.7691	20.6504	75	20.0912	24.0125	20.7772	21.0074	18.9581	18.7373		19.6609	17.5337	20.8864	19.8947		19.1029		76.9231	20.0571
ARHGDIA	Rho GDP-dissociation inhibitor 1		18.2798	17.3736	18.2071	17.2234		17.0763	17.0702	75	17.5384		18.0071	16.5561		17.6394	17.1468	20.0087	16.633	16.6865	17.1589	17.0392		17.1973	76.9231	17.4073
DPYSL2	Dihydropyrimidinase-related protein 2		14.7581	16.8425	14.466	14.0918		13.5056	14.1714	75	14.6393	14.6121	17.2	15.1907		15.5354	14.4728	21.3138	15.14		16.8305	16.491		16.1705	76.9231	16.2957
MMP3	Stromelysin-1	19.1699		17.8487		16.5101	18.9908	18.2059	21.6893	75	18.7358	21.0478	22.4505	17.837	21.1942	16.9635		16.9935	16.9229	20.271			16.3986		69.2308	18.8977
CAND1	Cullin-associated NEDD8-dissociated protein 1		16.6854	16.4556	18.0829	16.5698	15.6422	16.4432		75	16.6465		16.2831	16.3248		17.7469	16.6655	18.7877		15.8453	15.645	16.9335		16.6006	69.2308	16.7592
HSPA5	Endoplasmic reticulum chaperone BiP			18.2093	18.9071	17.2231	15.8574	16.631	15.8819	75	17.1183	16.8153	18.0113	16.5655		18.2136	17.4494	20.5083				16.1037		15.9948	61.5385	17.4577
ARPC2	Actin-related protein 2/3 complex subunit 2			17.7999	17.468	17.5701	17.2699	18.8897	17.2649	75	17.7104		17.8044			17.1894	17.2412	19.7941		16.8514	17.3902	18.2159		17.2987	61.5385	17.7231
CORO1A	Coronin-1A			18.7094	18.6915	20.3534	19.4394	21.6595	19.2954	75	19.6914	18.6214	18.1421			18.322		18.278	17.5339		17.8579	17.6556		18.1824	61.5385	18.0742
VCP	Transitional endoplasmic reticulum ATPase		17.8557	17.3812	18.4953	18.2428		17.878	17.4012	75	17.8757			17.0029		18.445	18.0067	19.5179		16.596	17.0151	17.5356		19.2975	61.5385	17.9271
DCN	Decorin	17.1113	16.3288	16.562	19.3408	17.9728			14.7484	75	17.0107		15.6509	16.5948	14.5664	19.5677	17.3071	22.3689					15.7186	15.8906	61.5385	17.2081
IGHV3-74;IGHV3-66;IGHV3OR16-13	Immunoglobulin heavy variable 3-74;Immunoglobulin heavy variable 3-66;Immunoglobulin heavy variable 3/OR16-13 (non-functional) (Fragment);Immunoglobulin heavy variable 3-53	21.7679	23.7317	24.1636	22.6466	23.4261		23.2379		75	23.1623	23.9778	22.8505		23.026	22.8424			23.6306	23.8056			23.7645		53.8462	23.4139
PRDX6	Peroxiredoxin-6		17.9952	18.0712	18.1127	18.4066	16.8636	16.2719		75	17.6202	16.3372	16.8698	18.724		16.2397	17.7009	18.8221		17.4572					53.8462	17.4501
VAT1	Synaptic vesicle membrane protein VAT-1 homolog		17.3705	16.5267	16.3438	16.9511	16.5958	16.8752		75	16.7772	16.382	16.3466	16.363	16.6402	16.5246		18.9149			17.3361				53.8462	16.9296
STOM	Stomatin			16.2786	19.0321	17.712	17.1808	17.4588	17.1313	75	17.4656	16.7164		17.9007		18.52	16.9328	17.889				17.3233			46.1538	17.547
HIST1H2BL;HIST1H2BM;HIST1H2BN;HIST1H2BH;HIST2H2BF;HIST1H2BC;HIST1H2BD;H2BFS;HIST1H2BK;HIST3H2BB;HIST2H2BE;HIST1H2BB;HIST1H2BO;HIST1H2BJ	Histone H2B type 1-L;Histone H2B type 1-M;Histone H2B type 1-N;Histone H2B type 1-H;Histone H2B type 2-F;Histone H2B type 1-C/E/F/G/I;Histone H2B type 1-D;Histone H2B type F-S;Histone H2B type 1-K;Histone H2B type 3-B;Histone H2B type 2-E;Histone H2B type	20.1322			21.2273	18.987	22.5432	22.6693	20.5607	75	21.0199		17.7882		17.2527	21.0419						19.9876		17.9127	38.4615	18.7966
F5	Coagulation factor V	24.7196	20.1398	20.3028	19.7851		19.346		19.6897	75	20.6638		16.421	19.8285		20.8952	19.6349							19.7612	38.4615	19.3082
CCT6A	T-complex protein 1 subunit zeta		15.9513	15.763	16.5258	15.705		15.419	16.0377	75	15.9003					16.8202	15.0341	16.5695							23.0769	16.1412
	Immunoglobulin heavy variable 1-69		17.811	19.372	17.949	18.0827		18.9797		62.5	18.4389	17.1822	18.501	18.0881	18.919	17.9782	16.6942	18.1599	18.8361	18.5792	18.7368	17.9334	18.4142	17.3177	100	18.1031
APOC1	Apolipoprotein C-I			20.4098	19.332	19.4766		20.8329	20.0395	62.5	20.0182	20.1308	20.4593	19.8854	20.5712	19.7423	19.2759	18.8663	19.5529	20.0048	19.3578	19.8005	20.6744	19.8208	100	19.8571
MMP2	72 kDa type IV collagenase			17.0231	19.958	16.2841	17.2492		16.5176	62.5	17.4064	19.2759	17.4397	15.1232	18.9686	19.4163	17.3721	17.9319	17.2005	19.156	19.0867	17.2424	17.5264	17.1704	100	17.9162
FCGBP	IgGFc-binding protein		16.1595	18.8185	15.4519	15.7445		15.8264		62.5	16.4001	16.3978	16.4118	15.5221	17.782	15.856	17.2426	16.2804	18.4987	16.8542	16.4075	17.0529	17.5965	16.5833	100	16.8066
CHI3L1	Chitinase-3-like protein 1			16.5679	16.6313	16.8611		17.8244	16.9444	62.5	16.9658	18.3634	16.1798	15.1376	19.0745	17.0728	15.9813	16.5355	17.7307	18.902	19.703	20.0471	16.2341	18.3452	100	17.639
ACTR3	Actin-related protein 3			16.3589	17.0818	16.68		17.8851	17.1072	62.5	17.0226	16.3223	17.2351	16.1314	15.2907	17.6089	16.1354	18.6256	16.0797	16.4112	17.8223	18.5465	15.6381	17.6751	100	16.8863
IGHV3-15	Immunoglobulin heavy variable 3-15	23.3688		23.535	22.1702	23.151		23.671		62.5	23.1792	23.4378	24.3643	23.8595	23.7295	22.1936	23.5506	23.7333	23.5161		23.458	23.0212	23.0059	22.6341	92.3077	23.3753
F13A1	Coagulation factor XIII A chain			16.44	18.8385	16.6851		16.7744	16.5987	62.5	17.0674	16.6321	16.769	16.6325		17.8073	16.6796	18.8057	15.4554	17.1766	17.0118	17.8551	18.2824	18.3907	92.3077	17.2915
	Immunoglobulin lambda variable 6-57			20.306	18.5454	19.921	19.4971	19.7028		62.5	19.5944	19.3867	20.9122	19.8178	20.1378	18.4805	19.5069	20.1388		18.9884	19.1871	18.3363	19.0161	17.8688	92.3077	19.3148
CTSD	Cathepsin D		18.4367	17.7243	19.9552	16.5052		16.7788		62.5	17.8801	17.556	17.3281	21.0343	18.0643	20.2381		21.0419	17.5557	17.1491	19.6729	20.3911	17.1121	18.4995	92.3077	18.8036
PRDX1	Peroxiredoxin-1		16.4731	18.8891	18.0653	18.1613	18.1951			62.5	17.9568	17.9344	18.4436	21.0109	17.5693	17.3299	18.6724	22.5722	17.4467	17.7104	19.0975	19.7909		17.8929	92.3077	18.7892
CNDP1	Beta-Ala-His dipeptidase			16.6771	17.3646	16.9894	17.0429		18.5183	62.5	17.3185	18.1737	17.7173	17.8845	16.9857	16.9589	17.9594	18.141		17.2532	18.1288	17.9183	18.0415	18.331	92.3077	17.7911
SLC4A1	Band 3 anion transport protein		16.1169	14.311	21.5201	19.375	15.2393			62.5	17.3125	17.3751	13.7755	19.0837	16.2066	21.7509	18.0371	18.1757	17.9007	14.9753		19.0048	15.1794	15.7664	92.3077	17.2693
CTSB	Cathepsin B			17.6987	18.8889	17.8866		17.4473	17.748	62.5	17.9339	17.5492	18.3222	17.7729	18.2688	18.909		18.808	18.2973	17.6808	20.1663	20.156	17.4057	19.7655	92.3077	18.5918
ANXA5	Annexin A5			15.979	18.2941	16.753		17.0115	16.7189	62.5	16.9513	16.4999	16.0618	16.2816	16.0123	17.8201	17.3247	19.172	16.0408	17.9923	19.0515	16.9895	16.0706		92.3077	17.1097
C4BPB	C4b-binding protein beta chain	22.3094		20.7329	20.8937			20.1691	20.4856	62.5	20.9181	19.3812	20.0751	20.734	20.6229	19.9788	20.4922		19.5914	20.0074		20.6219	19.878	20.1403	84.6154	20.1385
THBS4	Thrombospondin-4		18.6945	17.6617	18.187	17.8015			17.2492	62.5	17.9188	19.4903	18.4351	17.24	19.5391	19.2825	17.4485	19.8785	18.5483	18.8607	17.3324			18.1244	84.6154	18.5618
FTL	Ferritin light chain		20.114	19.6828	19.3436	18.6666			16.9462	62.5	18.9506	18.4042	16.793	18.9973	16.7102	18.6007	17.683	22.8366		17.663	19.7314	22.3623		19.9752	84.6154	19.0688
MXRA5	Matrix-remodeling-associated protein 5			16.0911	17.2714		16.9704	17.44	16.4935	62.5	16.8533		17.4246		15.8807	17.9579	16.6286	16.4381		17.5296	16.3126	16.3939	17.8761	19.9112	76.9231	17.2353
BTD	Biotinidase		17.931			16.6227	17.6621	18.2404	17.9988	62.5	17.691		17.9724	18.8103	18.4649			18.2083	18.5883	18.441	18.7493	17.9876	18.425	17.0033	76.9231	18.265
HABP2	Hyaluro -binding protein 2			19.6734	21.5835	20.062		20.516	20.8088	62.5	20.5287	20.3018	20.0051		19.9513	21.9325	21.1069			20.3912	20.7805	20.1619	21.0107	20.7806	76.9231	20.6423
COL12A1	Collagen alpha-1(XII) chain			18.5307	20.0962	17.4356	19.0663	17.9034		62.5	18.6064	16.34	17.6418		16.904	20.0575	17.4964	18.6269		18.6123			17.8398	19.7749	69.2308	18.1437
FETUB	Fetuin-B				17.2689	16.6813	16.9854	18.3293	17.8824	62.5	17.4295	17.1172					16.4246		17.6046	17.7066	18.0601	17.4606	17.3259	18.3663	61.5385	17.5082
PDIA3	Protein disulfide-isomerase A3			17.9662	17.9723	17.4718	16.2254	16.9271		62.5	17.3126		18.0348	15.739		18.2687	17.6434	20.8061			16.8084	18.2593		17.9381	61.5385	17.9372
BGN	Biglycan	18.1895		17.6144	21.9047	20.055		15.4591		62.5	18.6445		16.8923	17.7638		21.0975	18.3006	22.6708		16.1861			15.5907	18.152	61.5385	18.3317
FERMT3	Fermitin family homolog 3		17.6588	16.165	17.2544	16.8509		16.8248		62.5	16.9508		16.416	17.1123		16.5742	15.8746	17.6629	16.4742	16.4732	16.8384				61.5385	16.6782
COL14A1	Collagen alpha-1(XIV) chain		14.9212	13.815	15.6829	15.8435		12.4735		62.5	14.5472		14.1205	14.552		16.3864	16.1831	22.7035		11.7649				13.3192	53.8462	15.5757
CALR	Calreticulin			17.0227	17.269	16.6386	16.4691	16.3606		62.5	16.752	15.8351	17.2513	15.3209	15.7545	17.2572		18.9701				17.0091			53.8462	16.7712
UBA1	Ubiquitin-like modifier-activating enzyme 1		16.5966	17.3167	17.2767	16.6682		16.8977		62.5	16.9512	16.0334	17.2588	16.5948		17.4691	16.2176	20.2044						15.4169	53.8462	17.0279
PSMA6	Proteasome subunit alpha type-6			16.151	17.0803	16.8918		16.131	16.0702	62.5	16.4649			15.9023		17.2568	16.467	18.467			16.2569	17.8162		16.4295	53.8462	16.9423
MMP9	Matrix metalloproteinase-9				16.7103	17.3216	17.8566	18.4426	18.5028	62.5	17.7668					16.8591				16.4716	16.8042	19.3185	16.4319	17.1732	46.1538	17.1764
TXN	Thioredoxin		19.3065	17.5124	16.8055	18.0298		17.1821		62.5	17.7673			18.3136			17.8022	20.9979			17.2025	17.1182		16.9963	46.1538	18.0718
HBG2;HBG1	Hemoglobin subunit gamma-2;Hemoglobin subunit gamma-1		20.6045		20.0254	19.8265	19.5015	18.5698		62.5	19.7056	20.2303		21.24		20.0633	19.8722	20.5137				19.314			46.1538	20.2056
ANXA6	Annexin A6			15.4716	16.1508	16.0698		16.2826	15.6112	62.5	15.9172			15.496		15.8469		17.5468				16.1947		16.0027	38.4615	16.2174
UGP2	UTP--glucose-1-phosphate uridylyltransferase			18.5933	16.5716	17.7497		17.7212	16.8657	62.5	17.5003	16.7277		17.7937				20.8535				17.3008		17.029	38.4615	17.9409
CAPZA1	F-actin-capping protein subunit alpha-1			17.6634	17.8824	17.5678	16.3776	17.0877		62.5	17.3158			16.3447		17.2128	17.5187	19.988							30.7692	17.766
PYGL	Glycogen phosphorylase, liver form			16.8667	16.1608	17.1227		18.6439	17.0228	62.5	17.1634			17.3157				18.6312				17.0515		16.8149	30.7692	17.4533
CTSG	Cathepsin G			17.7713	20.7864	19.2201		20.5698	20.7732	62.5	19.8242		18.617			20.1448									15.3846	19.3809
ITGAM	Integrin alpha-M				15.8689	16.2059	16.6915	17.9328	15.9428	62.5	16.5284										18.2977	16.7213			15.3846	17.5095
ANXA3	Annexin A3				15.8906	16.4032	16.7142	18.0662	17.7124	62.5	16.9573														0	#DIV/0!
HTRA1	Serine protease HTRA1			18.4027	20.8198		17.6517		18.707	50	18.8953	19.1178	18.5893	18.3435	19.9137	20.0461	19.7655	18.2906	20.1314	21.1827	21.2891	18.8374	21.247	19.2553	100	19.693
PTGDS	Prostaglandin-H2 D-isomerase	25.0333		17.6994	17.5336			16.9527		50	19.3047	20.8334	19.4116	18.5672	21.5172		20.1102	18.9215	19.6523	19.6798	19.4472	18.8334	16.7693	17.8778	92.3077	19.3018
IGKV2-24;IGKV2D-24	Immunoglobulin kappa variable 2-24;Probable non-functional immunoglobulin kappa variable 2D-24		22.533	23.9169		21.7644			23.5254	50	22.9349	22.633	23.566	23.1182	22.5595	18.7725	24.0137	22.1048	23.7772		23.8248	23.7741		23.2631	84.6154	22.8552
	Immunoglobulin heavy variable 2-70D			18.2608	19.3648	18.8911		21.2405		50	19.4393	18.0512	19.5965	19.6692	18.8974	18.2991		19.0684	20.6908	18.4581		20.885	19.0723	19.8633	84.6154	19.3228
ECM1	Extracellular matrix protein 1	21.7895			19.9727			18.5448	19.0065	50	19.8284	18.8582	18.6441	18.647	19.1247	18.6778	18.9887			19.4958	19.0858	19.1481	19.0635	18.8232	84.6154	18.9597
FCN2	Ficolin-2		19.3612				18.241	18.2589	19.1435	50	18.7511		17.7019	19.1315	18.2698	18.0061		18.1383		18.1754	18.408	18.2298	18.8314	18.2074	76.9231	18.31
LYZ	Lysozyme C				18.8608	19.8534		21.1149	20.1976	50	20.0067			18.8525	19.2878	19.351		18.463	19.8468	19.5806	21.6724	20.2914	19.4574	19.6188	76.9231	19.6422
FBP1	Fructose-1,6-bisphosphatase 1		17.1957	16.4624	16.4353			16.988		50	16.7704	16.7044	18.1116		16.0736	16.2977		20.2755	17.6284	16.8425	20.6208	20.4699		17.2928	76.9231	18.0317
RNH1	Ribonuclease inhibitor			16.7422	16.7667			16.0891	16.4928	50	16.5227		17.1194	16.718		16.6798	16.9716	19.4014	16.6777	16.2515	18.6078	16.808		16.1358	76.9231	17.1371
	Immunoglobulin heavy variable 1-2		19.3053		18.0129	19.9446		18.4369		50	18.9249	19.9841	19.713		19.0191	18.393		19.1413	19.6158	18.8188			19.0697	18.7898	69.2308	19.1716
IGLV7-46	Immunoglobulin lambda variable 7-46;Immunoglobulin lambda variable 7-43			20.4167	19.9535	20.6705		20.1174		50	20.2895	23.1648	21.7106	20.7496	21.3047	20.0807	22.828	21.193	22.2486		22.2224				69.2308	21.7225
THBS2	Thrombospondin-2			15.6043	19.6797		14.1851	16.5414		50	16.5026		15.0174	16.5168		19.4213	15.6465	16.6938		14.7686			16.7977	19.245	61.5385	16.7634
AK1	Adenylate kinase isoenzyme 1			17.2592	17.4452	16.1534			15.8089	50	16.6666	15.0971	15.4034	18.6421		17.2275	16.3941	20.0173		15.9062				15.7142	61.5385	16.8002
OGN	Mimecan	15.839		14.7092	18.1103	16.4343				50	16.2732	13.225		16.7886	16.6478	18.1428	16.7217	21.6411	15.6472		16.1197				61.5385	16.8667
NME1	Nucleoside diphosphate kinase A			19.1104	19.5002	18.5512			18.7137	50	18.9689		18.8249	19.1099		19.6001	19.0166	20.6211		18.8135		18.9944		18.6386	61.5385	19.2024
SPARC	SPARC	20.1614		19.2287	20.6718		19.4048			50	19.8667					20.8191	19.1188	18.6917		18.7779		18.5836	18.9057	20.2525	53.8462	19.307
IDH1	Isocitrate dehydrogenase [NADP] cytoplasmic			16.3616		16.1893	14.764		15.5226	50	15.7094		16.1024	16.1422				19.9108		15.4186	16.9811	17.7241		17.1418	53.8462	17.0602
ANK1	Ankyrin-1	16.9388			21.0765	18.9837	17.1811			50	18.545	18.2804		19.0535		21.0022	17.8726	19.3733	16.7796			18.5303			53.8462	18.6988
EIF4A1	Eukaryotic initiation factor 4A-I			17.0521	18.0591	16.8732		16.0603		50	17.0112		17.0785	15.9553		17.2012	16.1349	19.8708			15.434			16.7528	53.8462	16.9182
PEBP1	Phosphatidylethanolamine-binding protein 1	16.705	18.2495	18.547		17.8599				50	17.8403		17.5668	19.653		16.3864	18.8618	20.8743			17.5522				46.1538	18.4824
TPM2	;Tropomyosin beta chain			16.2478	18.3306	17.6221	15.0936			50	16.8235		16.3389	22.734		17.4136	17.8397	21.202						16.1482	46.1538	18.6127
SERPINH1	Serpin H1		16.9676	18.2127	19.5127	16.8175				50	17.8776		17.224			18.8403		20.0483		16.0699				17.8288	38.4615	18.0023
RAN	GTP-binding nuclear protein Ran			18.0199	19.4186	18.743			17.6506	50	18.458			17.6555		19.5913	17.3299	18.8067		17.2492					38.4615	18.1265
LAP3	Cytosol aminopeptidase			17.0979	16.1309	16.6547			16.7203	50	16.651		16.7377			16.3228	16.4991	19.8426						16.8839	38.4615	17.2572
CAPZB	F-actin-capping protein subunit beta		17.2495		17.5025	18.0561	17.5134			50	17.5804					17.5695		19.9996			17.6134	18.2224		17.2554	38.4615	18.1321
F10	Coagulation factor X		18.6149	17.4051			16.9168	18.0699		50	17.7517	17.8971		18.0722			17.9992	17.1277							30.7692	17.774
SAA1	Serum amyloid A-1 protein	24.8087	24.1867	22.5583			17.6251			50	22.2947		17.1229	17.1691			16.5531						16.2707		30.7692	16.7789
MST1;MST1L	Hepatocyte growth factor-like protein;Putative macrophage stimulating 1-like protein		19.0082	18.2627	17.6655				18.4693	50	18.3514			17.6897	18.5293				18.5638	19.1318					30.7692	18.4787
PGM1	Phosphoglucomutase-1			16.8122	14.9801	15.8297	15.284			50	15.7265			18.0542		14.1619	15.6994	20.325							30.7692	17.0601
BLVRA	Biliverdin reductase A		15.7658	15.869	16.3923			15.2271		50	15.8135			15.741		15.6634	16.1549	17.5214							30.7692	16.2702
AZU1	Azurocidin				18.1993	18.8436		20.1477	19.3321	50	19.1306					18.6392									7.69231	18.6392
NAMPT	Nicotinamide phosphoribosyltransferase		18.0918			17.954	18.0801	18.7808		50	18.2267							18.1053							7.69231	18.1053
BPI	Bactericidal permeability-increasing protein					16.2767	17.1743	17.4511	16.5924	50	16.8736														0	#DIV/0!
COL6A2	Collagen alpha-2(VI) chain			14.8174	22.5618		14.2441			37.5	17.2078	15.6293	15.2945		16.915	22.3552	14.5854	16.6625		17.571	14.2138			15.8876	69.2308	16.5682
CAPG	Macrophage-capping protein			17.0505	16.6406			17.157		37.5	16.9494	17.2533	17.0651	17.955			16.2386	21.5393	16.5108		19.0456	19.5635		16.4721	69.2308	17.9604
CD109	CD109 antigen			16.6291	15.9838	16.3271				37.5	16.3134	16.737				16.199		18.0414	17.0834	16.9609	19.2909	19.0506	15.9771	17.341	69.2308	17.409
UGDH	UDP-glucose 6-dehydrogenase			18.1325	18.0955	17.5713				37.5	17.9331	16.506	18.2657	16.9794		17.9073	18.0054	20.5653		17.2804	17.1066			17.1132	69.2308	17.7477
ALDH1A1	Aldehyde dehydrogenase 1A1			16.252	16.4925	17.2573				37.5	16.6673			19.2779		16.7109	17.5543	21.818	16.7504	15.3873	19.4416	17.3439		15.8965	69.2308	17.7979
TFRC	Transferrin receptor protein 1			17.7632		17.0726			16.826	37.5	17.2206	17.0742	17.4368		17.359				17.0245	16.8046	18.7929	18.4254	16.846	17.1397	69.2308	17.4337
MDH1	Malate dehydrogenase, cytoplasmic		19.3043	19.001		18.6083				37.5	18.9712	17.7724	18.4441	20.8985			18.9615	21.226		17.6133	16.6971	19.1711		18.1811	69.2308	18.7739
IGLV3-9	Immunoglobulin lambda variable 3-9				19.9033	20.4006			20.5719	37.5	20.2919	20.8066		21.4239		20.0063		20.5228		19.4293		19.9476	20.0284	19.8106	61.5385	20.2469
YWHAG	14-3-3 protein gamma			17.7988	17.9746			17.3554		37.5	17.7096	17.6319	17.8025	18.3734		18.2318	17.7624	19.7655			17.3582	18.5312			61.5385	18.1821
IQGAP1	Ras GTPase-activating-like protein IQGAP1			16.3243	16.471			16.1815		37.5	16.3256		16.58	14.6798		16.5976	14.0722	19.6449			15.7344	15.2408		14.5232	61.5385	15.8841
OMD	Osteomodulin	19.7107		15.4279	19.8114					37.5	18.3167				15.9861	19.5369	15.8498	17.586	15.0229	16.7043	16.3357		16.7533		61.5385	16.7219
	Immunoglobulin kappa variable 1-16			19.3751	18.3195			19.445		37.5	19.0465		19.3631	19.8803		18.7319	19.3403		18.9582	19.1117		18.8341			53.8462	19.1742
C1RL	Complement C1r subcomponent-like protein	22.1059	16.7028				18.5651			37.5	19.1246					16.2864	18.7647			18.3335	18.7063	18.0339	18.6349	18.5758	53.8462	18.1908
PSMA7;PSMA8	Proteasome subunit alpha type-7;Proteasome subunit alpha-type 8			17.0384	17.8906	16.6993				37.5	17.2094		16.6186	16.7783		17.6458	16.6612	18.9656		16.4434		17.6308			53.8462	17.2491
SPTA1	Spectrin alpha chain, erythrocytic 1	17.928			20.3772	15.8587				37.5	18.0546	16.6795		17.6264		20.2638	15.4866	17.5526	16.8571			16.0818			53.8462	17.2211
CKM	Creatine kinase M-type	16.2787	18.0397	20.7085						37.5	18.3423	14.8229	19.8838	24.5995		15.2466	19.2588	24.2589						18.8575	53.8462	19.5611
SERPINE1	Plasminogen activator inhibitor 1				17.6771			17.8697	16.4146	37.5	17.3204		16.4053							16.9304	16.6114	16.8036	16.9595	17.6031	46.1538	16.8855
ALAD	Delta-aminolevulinic acid dehydratase			16.6462	17.2816	18.0611				37.5	17.3296			18.9768		16.6458	17.3569	18.4868		15.9618		17.0985			46.1538	17.4211
RAB1A;RAB1C	Ras-related protein Rab-1A;Putative Ras-related protein Rab-1C			18.2695	19.0045			18.2228		37.5	18.4989	18.1707	17.7395	17.0787		19.1126	18.0178	20.8081							46.1538	18.4879
CETP	Cholesteryl ester transfer protein			16.6221	18.1111	17.2379				37.5	17.3237				17.3516	18.0792	17.6026				17.0785		17.8494	17.3508	46.1538	17.552
HSPB1	Heat shock protein beta-1			16.9282	17.2506	17.0534				37.5	17.0774		17.3122		16.412	16.8342		19.0463			17.4111			16.0515	46.1538	17.1779
ASPN	Asporin			17.455	19.7115	19.2695				37.5	18.812		16.193	16.8249	16.1011	18.7154	17.6675	19.9898							46.1538	17.582
IGKV1D-13	Immunoglobulin kappa variable 1-13;Immunoglobulin kappa variable 1D-13					17.1727		22.3187	18.7871	37.5	19.4262					19.2072	21.2803	21.5606				21.7457		20.787	38.4615	20.9162
APMAP	Adipocyte plasma membrane-associated protein				18.0739		17.8457	17.981		37.5	17.9668	17.2743		17.4711		17.6271		17.3156						16.9385	38.4615	17.3253
	Immunoglobulin heavy variable 5-10-1	19.7832	19.3693	21.1846						37.5	20.1124		20.4875	19.3928		19.313		20.3343							30.7692	19.8819
SPTB	Spectrin beta chain, erythrocytic			14.7085	19.6694		14.4081			37.5	16.262			14.9942		18.611		14.6142				13.8102			30.7692	15.5074
PARK7	Parkinson disease protein 7			17.3857				16.8681	16.3177	37.5	16.8572			18.4161			17.4507	18.9526				16.5789			30.7692	17.8496
AHCY	Adenosylhomocysteinase				15.4701	16.1269		15.7391		37.5	15.7787			16.4679				19.4703				17.6668		16.5224	30.7692	17.5318
IGFBP3	Insulin-like growth factor-binding protein 3		21.2386			22.3274		21.8731		37.5	21.813					21.2127	22.1617	21.9818							23.0769	21.7854
IGLV9-49	Immunoglobulin lambda variable 9-49			18.7363		18.4477		18.0252		37.5	18.4031			17.5203							19.109		18.6227		23.0769	18.4174
WDR1	WD repeat-containing protein 1			17.4491	17.7596			17.7569		37.5	17.6552			17.5513		18.0728		19.2533							23.0769	18.2925
EPB42	Protein 4,2				18.9641	17.2989	16.347			37.5	17.5367			16.9827		19.0742		16.4979							23.0769	17.5183
WARS	Tryptophan--tRNA ligase, cytoplasmic			15.8517	15.5482			15.9929		37.5	15.7976			15.9932				17.884				16.4901			23.0769	16.7891
TAGLN2	Transgelin-2				17.5946	16.8392		16.1212		37.5	16.8517					17.4684		19.145	16.2866						23.0769	17.6333
PRELP	Prolargin	18.6275			20.4421	17.413				37.5	18.8275			17.8295		21.1167		19.9512							23.0769	19.6324
IGJ	Immunoglobulin J chain			20.2241			21.6814	20.68		37.5	20.8619							20.2809						21.7723	15.3846	21.0266
IGLL1	Immunoglobulin lambda-like polypeptide 1			19.7073		17.7601			18.8452	37.5	18.7709				19.9557					17.5483					15.3846	18.752
FSTL1	Follistatin-related protein 1	19.3176					16.5923	16.3286		37.5	17.4128											16.2772		16.7619	15.3846	16.5195
ARF4	ADP-ribosylation factor 4			15.7673	16.9363	15.9813				37.5	16.2283					16.4021		18.3053							15.3846	17.3537
CCT8	T-complex protein 1 subunit theta			15.8024	16.5583	16.243				37.5	16.2012					16.4753		17.7237							15.3846	17.0995
KPNB1	Importin subunit beta-1			14.2648	15.2336	13.8478				37.5	14.4487					14.9495									7.69231	14.9495
MBL2	Mannose-binding protein C					17.8572	17.8679	17.9592		37.5	17.8947														0	#DIV/0!
PRTN3	Myeloblastin					16.3199	17.3562	19.2915		37.5	17.6559														0	#DIV/0!
SPP1	Osteopontin	20.9891			21.1862					25	21.0876				17.9631	21.395				17.1934	19.6381	22.7729	17.1907	19.573	53.8462	19.3894
AEBP1	Adipocyte enhancer-binding protein 1			15.9765	20.3858					25	18.1812		16.2113		15.5544	19.5014	15.6125	17.9955		16.2851			16.6859		53.8462	16.8352
S100A4	Protein S100-A4				19.3552			18.0287		25	18.692			18.4205		18.8953		20.509		18.4584	19.5181	19.2627		17.8809	53.8462	18.9921
COL15A1	Collagen alpha-1(XV) chain				18.1744				16.5522	25	17.3633					17.9173	16.4119			17.1606	16.702		17.3423	17.5919	46.1538	17.1877
TIMP1	Metalloproteinase inhibitor 1							21.3976	19.1762	25	20.2869	20.6023				20.6702			20.212	20.1462	20.2372			20.2787	46.1538	20.3578
EZR	Ezrin					16.039		16.2542		25	16.1466	16.3424				16.4571	16.0766		16.1428			17.4079	15.899		46.1538	16.3876
IGHV2-26	Immunoglobulin heavy variable 2-26							20.3433	18.6919	25	19.5176		18.7208	18.226							17.7175	18.157	19.5837		38.4615	18.481
CA3	Carbonic anhydrase 3	17.0658		20.671						25	18.8684		19.0654	24.2446			18.6908	21.5852						18.2307	38.4615	20.3633
FSCN1	Fascin			17.2344	16.1747					25	16.7046		15.2499				15.2246	20.6745					15.3133	16.2172	38.4615	16.5359
IGHV1-3	Immunoglobulin heavy variable 1-3			19.0215	17.9292					25	18.4754		19.5864			19.1269						19.2842	19.5888		30.7692	19.3966
GPX1	Glutathione peroxidase 1				17.1923	17.1669				25	17.1796			17.2729		17.2652	17.0767	19.5789							30.7692	17.7984
TYMP	Thymidine phosphorylase			16.5655	17.1024					25	16.8339			17.2521		17.3079		19.1092				18.0356			30.7692	17.9262
FMOD	Fibromodulin				18.9169	17.9857				25	18.4513				17.8534	19.9416		19.2349			17.2459				30.7692	18.5689
AHNAK	Neuroblast differentiation-associated protein AHNAK				13.6575	13.527				25	13.5923			14.3422				20.3941			15.2183			16.3029	30.7692	16.5644
NAGK	N-acetyl-D-glucosamine kinase			15.7285				16.2966		25	16.0125							17.9088			17.0391	17.0839		16.9473	30.7692	17.2448
PRPS2;PRPS1;PRPS1L1	Ribose-phosphate pyrophosphokinase 2;Ribose-phosphate pyrophosphokinase 1;Ribose-phosphate pyrophosphokinase 3				16.7642	16.3087				25	16.5365					16.9874	16.2787	16.6402							23.0769	16.6354
RAB7A	Ras-related protein Rab-7a				17.3365			17.6611		25	17.4988			16.8937		17.3263		19.2677							23.0769	17.8292
ARHGAP1	Rho GTPase-activating protein 1			15.7595	15.8808					25	15.8202			15.7535		15.8214		18.7177							23.0769	16.7642
PDIA6	Protein disulfide-isomerase A6			16.3108	17.6139					25	16.9623					17.665		18.1907						15.8838	23.0769	17.2465
CTSZ	Cathepsin Z			18.5696	18.96					25	18.7648			19.0801		19.118		19.9121							23.0769	19.3701
CD5L	CD5 antigen-like			20.1231		19.6654				25	19.8943		17.9609									20.7739			15.3846	19.3674
HPRT1	Hypoxanthine-guanine phosphoribosyltransferase					17.2495	15.9334			25	16.5915							17.0707				17.6117			15.3846	17.3412
BPGM	Bisphosphoglycerate mutase			18.2817		18.4737				25	18.3777			18.9692			19.4443								15.3846	19.2067
PFKM	ATP-dependent 6-phosphofructokinase, muscle type			15.4261	15.5021					25	15.4641			17.245				19.4368							15.3846	18.3409
SLC2A1	Solute carrier family 2, facilitated glucose transporter member 1				19.3899	18.0845				25	18.7372					18.5312						18.1993			15.3846	18.3652
PSMA3	Proteasome subunit alpha type-3				17.365	17.4115				25	17.3883					17.2151		18.7222							15.3846	17.9687
EEF1G	Elongation factor 1-gamma			15.7305	15.949					25	15.8397					16.1396		18.2639							15.3846	17.2017
DYNC1H1	Cytoplasmic dynein 1 heavy chain 1			13.6632	13.294					25	13.4786					13.979		17.4754							15.3846	15.7272
GANAB	Neutral alpha-glucosidase AB				16.4149	16.1818				25	16.2983					16.2448		18.5582							15.3846	17.4015
VASN	Vasorin	21.4926							15.719	25	18.6058				16.9565		15.0298								15.3846	15.9931
COL5A2	Collagen alpha-2(V) chain			18.4234	18.0269					25	18.2251					18.8564									7.69231	18.8564
EPB41	Protein 4,1				18.4402	17.2751				25	17.8577					18.0167									7.69231	18.0167
CSRP1	Cysteine and glycine-rich protein 1			16.3083		16.573				25	16.4406							19.3882							7.69231	19.3882
RPL22	60S ribosomal protein L22			16.2314	17.6542					25	16.9428					17.0578									7.69231	17.0578
MNDA	Myeloid cell nuclear differentiation antigen				16.2955			17.0414		25	16.6685					16.9652									7.69231	16.9652
GARS	Glycine--tRNA ligase				16.0642				16.4027	25	16.2335							18.6644							7.69231	18.6644
HK3	Hexokinase-3				16.5056			17.8953		25	17.2005							16.5188							7.69231	16.5188
ACTR1A	Alpha-centractin			16.8608	16.6542					25	16.7575							18.2653							7.69231	18.2653
HNRNPD	Heterogeneous nuclear ribonucleoprotein D0			15.6008			15.5768			25	15.5888							19.6039							7.69231	19.6039
TUBB6	Tubulin beta-6 chain			18.2278	17.8129					25	18.0203							19.5738							7.69231	19.5738
LCAT	Phosphatidylcholine-sterol acyltransferase	19.5984					17.9586			25	18.7785														0	#DIV/0!
SAA2	Serum amyloid A-2 protein	20.9424		19.8342						25	20.3883														0	#DIV/0!
MMP8	Neutrophil collagenase					16.5653	16.8012			25	16.6832														0	#DIV/0!
GGH	Gamma-glutamyl hydrolase		16.0548					16.2047		25	16.1297														0	#DIV/0!
ADIPOQ	Adiponectin			21.5662						12.5	21.5662	19.6127	20.7953	20.2164	20.7466			19.3193	19.7397		18.9914	20.2075	20.4052	20.2135	76.9231	20.0247
TNXB	Tenascin-X				16.5325					12.5	16.5325		16.0018	16.2723	17.0252	16.7		17.7272	16.3815		17.9339				53.8462	16.8631
LMNA	Prelamin-A/C				20.9089					12.5	20.9089	16.4512				20.2697		19.1568		16.4893	16.8642	17.7219		15.9001	53.8462	17.5505
CNDP2	Cytosolic non-specific dipeptidase		17.6478							12.5	17.6478		16.9574	16.4187		16.5773	16.7879	19.4517				17.5919		16.6942	53.8462	17.2113
CHIT1	Chitotriosidase-1						16.8918			12.5	16.8918	17.5185		15.4587	19.3082					17.571	22.8682	19.8153			46.1538	18.7566
BCAT1	Branched-chain-amino-acid aminotransferase, cytosolic				16.1166					12.5	16.1166					15.7131	15.8444	18.688			16.1536	16.0603		15.786	46.1538	16.3742
CD163	Scavenger receptor cysteine-rich type 1 protein M130			17.4475						12.5	17.4475				18.6575			17.3542	18.6659		20.2105	18.1065		17.5739	46.1538	18.4281
KCTD12	BTB/POZ domain-containing protein KCTD12				15.7145					12.5	15.7145						16.2105	19.5162	16.1895		17.8805	18.076		16.9629	46.1538	17.4726
RNPEP	Aminopeptidase B				15.0041					12.5	15.0041		15.4414	15.0531				17.5602			15.9475	15.6051		15.2807	46.1538	15.8147
KRT14;KRT15	;Keratin, type I cytoskeletal 14;;;Keratin, type I cytoskeletal 15					18.0605				12.5	18.0605				19.3276				17.5528			16.9464	17.7325	16.5121	38.4615	17.6143
IGHA2	Immunoglobulin heavy constant alpha 2					22.1818				12.5	22.1818	23.9267	23.2515			22.1799				23.6671	22.424				38.4615	23.0898
ST13;ST13P5;ST13P4	Hsc70-interacting protein;Putative protein FAM10A5;Putative protein FAM10A4				17.8009					12.5	17.8009			18.7564		18.2208	18.2687	19.475				18.8994			38.4615	18.7241
YWHAE	14-3-3 protein epsilon				18.1092					12.5	18.1092				18.7774	18.8761		19.0927			19.2963		18.1438		38.4615	18.8373
DKK3	Dickkopf-related protein 3	18.7509								12.5	18.7509	17.3852			17.629		17.494			18.2101	18.1557				38.4615	17.7748
CKB	Creatine kinase B-type				17.8064					12.5	17.8064			16.3784		16.7	15.3277	18.4997							30.7692	16.7264
AKR1A1	Aldo-keto reductase family 1 member A1				14.9279					12.5	14.9279			15.3062				19.079			15.6929	15.6741			30.7692	16.4381
IGHV1-24	Immunoglobulin heavy variable 1-24			19.8727						12.5	19.8727		19.1423			18.729			19.6111				18.6362		30.7692	19.0296
MB	Myoglobin			18.7354						12.5	18.7354		18.1691	23.7547			18.439	21.9158							30.7692	20.5697
DBH	Dopamine beta-hydroxylase								16.1885	12.5	16.1885				17.5805				16.7749		16.5341		16.6991		30.7692	16.8972
PROZ	Vitamin K-dependent protein Z						16.9619			12.5	16.9619										16.8057	17.6736	16.5457	17.4181	30.7692	17.1108
FABP5	Fatty acid-binding protein 5			16.1582						12.5	16.1582							17.2059			16.6308	17.7709		17.7096	30.7692	17.3293
PFKP	ATP-dependent 6-phosphofructokinase, platelet type				16.365					12.5	16.365			16.1629		16.1453		18.6617			16.7073				30.7692	16.9193
	Immunoglobulin kappa variable 1D-39;Immunoglobulin kappa variable 1-39			18.5795						12.5	18.5795	18.5569	17.389	17.0693											23.0769	17.6717
KRT5	;Keratin, type II cytoskeletal 5						17.3012			12.5	17.3012				21.1776				16.9701				17.5528		23.0769	18.5668
PLS3	Plastin-3				13.3935					12.5	13.3935		13.6541			13.4823		18.6923							23.0769	15.2762
DPYSL3	Dihydropyrimidinase-related protein 3			16.9622						12.5	16.9622		16.2235					21.2191		15.5527					23.0769	17.6651
IGLV8-61	Immunoglobulin lambda variable 8-61		22.7795							12.5	22.7795			21.4583				21.8671				21.4378			23.0769	21.5877
TPM3	Tropomyosin alpha-3 chain				17.5696					12.5	17.5696			20.2997			17.3087	17.6989							23.0769	18.4358
PSMB1	Proteasome subunit beta type-1				18.8166					12.5	18.8166			17.6445				18.932			18.4097				23.0769	18.3287
ATP5A1	ATP synthase subunit alpha, mitochondrial				17.4181					12.5	17.4181			17.0379		16.6787		17.8779							23.0769	17.1981
PSMB4	Proteasome subunit beta type-4				16.871					12.5	16.871					17.2176		17.9023				18.1549			23.0769	17.7583
PRDX5	Peroxiredoxin-5, mitochondrial							16.2355		12.5	16.2355			16.3558				18.115						16.0445	23.0769	16.8384
HSPA4	Heat shock 70 kDa protein 4				19.6411					12.5	19.6411		19.2819			19.4896		20.2086							23.0769	19.66
OLA1	Obg-like ATPase 1				16.1208					12.5	16.1208			16.3037		16.4484		16.6817							23.0769	16.4779
IGKV1-27	Immunoglobulin kappa variable 1-27			18.2388						12.5	18.2388	17.5389			19.1022										15.3846	18.3205
ARPC1B	Actin-related protein 2/3 complex subunit 1B							17.9177		12.5	17.9177						18.4178	18.6961							15.3846	18.5569
F7	Coagulation factor VII				18.3784					12.5	18.3784					18.3578							16.4367		15.3846	17.3972
SOD3	Extracellular superoxide dismutase [Cu-Zn]	21.6066								12.5	21.6066							19.2904			18.4801				15.3846	18.8852
FCGR3A	Low affinity immunoglobulin gamma Fc region receptor III-A	24.4432								12.5	24.4432				17.5829				17.3778						15.3846	17.4804
LGALS1	Galectin-1				18.1455					12.5	18.1455			17.8989				20.2984							15.3846	19.0987
ESD	S-formylglutathione hydrolase			17.8901						12.5	17.8901			17.9733				19.5246							15.3846	18.7489
MYH7;MYH6	Myosin-7;Myosin-6						17.8517			12.5	17.8517			17.8904										18.092	15.3846	17.9912
ENO3	Beta-enolase			18.379						12.5	18.379			21.9389				21.9648							15.3846	21.9519
CBR1	Carbonyl reductase [NADPH] 1				15.7174					12.5	15.7174		15.7449					18.0924							15.3846	16.9186
NME2;NME2P1	Nucleoside diphosphate kinase B;Putative nucleoside diphosphate kinase			17.1318						12.5	17.1318					16.8763		18.703							15.3846	17.7896
SNCA	Alpha-synuclein					17.8452				12.5	17.8452			17.4107				16.846							15.3846	17.1283
ACLY	ATP-citrate synthase				15.9014					12.5	15.9014					16.0584		17.1165							15.3846	16.5874
MYL6;MYL6B	Myosin light polypeptide 6;Myosin light chain 6B							18.3941		12.5	18.3941			17.9293				18.8659							15.3846	18.3976
PPP1CB;PPP1CC;PPP1CA	Serine/threonine-protein phosphatase PP1-beta catalytic subunit;Serine/threonine-protein phosphatase PP1-gamma catalytic subunit;Serine/threonine-protein phosphatase PP1-alpha catalytic subunit				16.0376					12.5	16.0376					16.3665		18.3123							15.3846	17.3394
CALD1	Caldesmon					16.8525				12.5	16.8525						16.6633	18.0559							15.3846	17.3596
DHX9	ATP-dependent RNA helicase A				13.8043					12.5	13.8043		11.7982			13.7462									15.3846	12.7722
SAMHD1	Deoxynucleoside triphosphate triphosphohydrolase SAMHD1				16.0526					12.5	16.0526		16.4417					17.4435							15.3846	16.9426
PIGR	Polymeric immunoglobulin receptor							18.9096		12.5	18.9096										20.0181				7.69231	20.0181
IGKV2D-30	Immunoglobulin kappa variable 2D-30;Immunoglobulin kappa variable 2-30					18.7214				12.5	18.7214										18.0111				7.69231	18.0111
HNRNPA1;HNRNPA1L2	Heterogeneous nuclear ribonucleoprotein A1-like 3;Heterogeneous nuclear ribonucleoprotein A1;Heterogeneous nuclear ribonucleoprotein A1-like 2		14.5151							12.5	14.5151							17.9824							7.69231	17.9824
DDT;DDTL	D-dopachrome decarboxylase;D-dopachrome decarboxylase-like protein							16.308		12.5	16.308						17.3503								7.69231	17.3503
CHAD	Chondroadherin				20.7892					12.5	20.7892					20.5852									7.69231	20.5852
F11	Coagulation factor XI		17.3914							12.5	17.3914					17.6466									7.69231	17.6466
EIF2S1	Eukaryotic translation initiation factor 2 subunit 1				17.2855					12.5	17.2855							17.8308							7.69231	17.8308
RPLP0;RPLP0P6	60S acidic ribosomal protein P0;60S acidic ribosomal protein P0-like				16.5216					12.5	16.5216							17.6055							7.69231	17.6055
LAMP2	Lysosome-associated membrane glycoprotein 2	21.1736								12.5	21.1736											18.5668			7.69231	18.5668
NCL	Nucleolin				17.1072					12.5	17.1072							18.9883							7.69231	18.9883
HNRNPA2B1	Heterogeneous nuclear ribonucleoproteins A2/B1					16.4894				12.5	16.4894							18.7291							7.69231	18.7291
ACP1	Low molecular weight phosphotyrosine protein phosphatase				16.5783					12.5	16.5783							15.817							7.69231	15.817
CANX	Calnexin				17.0457					12.5	17.0457							17.6295							7.69231	17.6295
TIMP3	Metalloproteinase inhibitor 3				18.3192					12.5	18.3192					17.6653									7.69231	17.6653
MMP12	Macrophage metalloelastase				17.8632					12.5	17.8632					17.7446									7.69231	17.7446
NNMT	Nicotinamide N-methyltransferase		15.6954							12.5	15.6954							16.5312							7.69231	16.5312
ALDH9A1	4-trimethylaminobutyraldehyde dehydrogenase			17.2169						12.5	17.2169							19.5274							7.69231	19.5274
COPB1	Coatomer subunit beta				15.7275					12.5	15.7275							17.0989							7.69231	17.0989
ARPC4	Actin-related protein 2/3 complex subunit 4							17.2503		12.5	17.2503							18.0378							7.69231	18.0378
PLOD1	Procollagen-lysine,2-oxoglutarate 5-dioxygenase 1				17.0238					12.5	17.0238					16.7633									7.69231	16.7633
MFGE8	Lactadherin				17.0522					12.5	17.0522					16.6694									7.69231	16.6694
PXDN	Peroxidasin homolog				16.7171					12.5	16.7171					16.4447									7.69231	16.4447
PGM2	Phosphoglucomutase-2			15.6985						12.5	15.6985							18.1001							7.69231	18.1001
CCT7	T-complex protein 1 subunit eta				16.2938					12.5	16.2938							16.4136							7.69231	16.4136
PEPD	Xaa-Pro dipeptidase									0	#DIV/0!		15.3235					16.5297	15.621		16.378	16.7229	14.8965	15.6597	53.8462	15.8759
CSTB	Cystatin-B									0	#DIV/0!		17.7616	18.9651			16.8676	21.112			17.9508	19.0441			46.1538	18.6169
TNFAIP6	Tumor necrosis factor-inducible gene 6 protein									0	#DIV/0!	17.7498	17.7249		17.8434		17.39	17.2223			20.3143				46.1538	18.0408
FABP4	Fatty acid-binding protein, adipocyte									0	#DIV/0!		18.2863	20.0966				20.4504	17.9343					21.8663	38.4615	19.7268
CAPN1	Calpain-1 catalytic subunit									0	#DIV/0!			16.7203				18.4157				16.653		16.5245	30.7692	17.0784
PSMA2	Proteasome subunit alpha type-2									0	#DIV/0!					16.6283		17.0578		16.2426		18.3359			30.7692	17.0661
VSIG4	V-set and immunoglobulin domain-containing protein 4									0	#DIV/0!								17.94	16.3116	17.7234	17.3353			30.7692	17.3276
CILP	Cartilage intermediate layer protein 1									0	#DIV/0!								16.6716	16.6104	16.9397				23.0769	16.7406
PROC	Vitamin K-dependent protein C									0	#DIV/0!			17.2332		17.6249								16.8154	23.0769	17.2245
MYL1	Myosin light chain 1/3, skeletal muscle isoform									0	#DIV/0!			19.6416			18.5991	20.8448							23.0769	19.6951
RNASE1	Ribonuclease pancreatic									0	#DIV/0!	18.6456							17.973		17.9888				23.0769	18.2024
GOT1	Aspartate aminotransferase, cytoplasmic									0	#DIV/0!			20.529			16.5748	18.2475							23.0769	18.4504
PSMB5	Proteasome subunit beta type-5									0	#DIV/0!		15.7926			17.0519				16.032					23.0769	16.2922
NPEPPS	Puromycin-sensitive aminopeptidase									0	#DIV/0!			16.8739				18.5098				16.6437			23.0769	17.3425
PLA2G7	Platelet-activating factor acetylhydrolase									0	#DIV/0!										15.851	16.7307		14.8899	23.0769	15.8239
RPS3	40S ribosomal protein S3									0	#DIV/0!			17.0351				19.0728							15.3846	18.0539
FBP2	Fructose-1,6-bisphosphatase isozyme 2									0	#DIV/0!			19.5317				19.8185							15.3846	19.6751
PLIN3	Perilipin-3									0	#DIV/0!			16.0629				17.6536							15.3846	16.8583
ADH1B	All-trans-retinol dehydrogenase [NAD(+)] ADH1B									0	#DIV/0!			17.7597				18.3226							15.3846	18.0412
SOD1	Superoxide dismutase [Cu-Zn]									0	#DIV/0!						20.9837	20.6054							15.3846	20.7946
HLA-DRA;HLA-DQA2	HLA class II histocompatibility antigen, DR alpha chain;HLA class II histocompatibility antigen, DQ alpha 2 chain									0	#DIV/0!										18.1296	15.9462			15.3846	17.0379
SOD2	Superoxide dismutase [Mn], mitochondrial									0	#DIV/0!			18.2664				18.6097							15.3846	18.438
ITGB2	Integrin beta-2									0	#DIV/0!										18.6268	17.8866			15.3846	18.2567
MYL3	Myosin light chain 3									0	#DIV/0!			19.7857			18.2607								15.3846	19.0232
TPM1	Tropomyosin alpha-1 chain									0	#DIV/0!			18.3222				17.7425							15.3846	18.0324
PYGM	Glycogen phosphorylase, muscle form									0	#DIV/0!			19.0945				18.8753							15.3846	18.9849
APEH	Acylamino-acid-releasing enzyme									0	#DIV/0!			17.7836				18.0346							15.3846	17.9091
ACAN	Aggrecan core protein									0	#DIV/0!								19.2896		17.9592				15.3846	18.6244
VCAM1	Vascular cell adhesion protein 1									0	#DIV/0!	16.3717			17.3386										15.3846	16.8551
GPD1	Glycerol-3-phosphate dehydrogenase [NAD(+)], cytoplasmic									0	#DIV/0!			18.4378				18.5783							15.3846	18.5081
GSTM2;GSTM5;GSTM3	Glutathione S-transferase Mu 2;Glutathione S-transferase Mu 5;Glutathione S-transferase Mu 3									0	#DIV/0!			17.2875				17.0862							15.3846	17.1869
MAN1A1	Mannosyl-oligosaccharide 1,2-alpha-mannosidase IA									0	#DIV/0!					16.2152					16.197				15.3846	16.2061
ATP6V1A	V-type proton ATPase catalytic subunit A									0	#DIV/0!					16.9441		18.4238							15.3846	17.6839
MDH2	Malate dehydrogenase, mitochondrial									0	#DIV/0!			17.0429				18.258							15.3846	17.6504
ME1	NADP-dependent malic enzyme									0	#DIV/0!							16.46			15.3518				15.3846	15.9059
TNNI2	Troponin I, fast skeletal muscle									0	#DIV/0!			19.4967				19.5588							15.3846	19.5277
RAB2A;RAB2B	Ras-related protein Rab-2A;Ras-related protein Rab-2B									0	#DIV/0!					15.7143		17.6067							15.3846	16.6605
LIPE	Hormone-sensitive lipase									0	#DIV/0!			16.2332				15.2901							15.3846	15.7616
EEF1A2	Elongation factor 1-alpha 2									0	#DIV/0!			18.9054				19.4413							15.3846	19.1734
FHL1	Four and a half LIM domains protein 1									0	#DIV/0!			23.0787				22.6307							15.3846	22.8547
FAM129B	Protein Niban 2									0	#DIV/0!					16.1793						16.8083			15.3846	16.4938

## Sheet: Supplementary Table S2
Supplementary Table 2: List of proteins identified with at least 2 peptides in at least 60 % of a group. Information on the frequency per sample and the average abundance, fold changes (average abundance from septic vs. aseptic group), and results from the statistical Mann Whitney U analysis are given. Intensities are log2 converted. Statistically significant proteins (p < 0.05) with differential…
Symbol	Name	LFQ intensity 01	LFQ intensity 02	LFQ intensity 05	LFQ intensity 08	LFQ intensity 12	LFQ intensity 14	LFQ intensity 16	LFQ intensity 21	Freq. [%] septic cases	Avg. Abundance septic	LFQ intensity 03	LFQ intensity 04	LFQ intensity 06	LFQ intensity 07	LFQ intensity 09	LFQ intensity 10	LFQ intensity 11	LFQ intensity 15	LFQ intensity 18	LFQ intensity 19	LFQ intensity 22	LFQ intensity 23	LFQ intensity 24	Frequ [%] aseptic cases	Avg. Abundance aseptic	p-value; MWU (septic vs. aseptic)	-log (p-value)	Fold change (avg. septic vs avg. aseptic)	log 2 Fold change (avg. septic vs avg. aseptic)
A1BG	Alpha-1B-glycoprotein	28.2616	24.914	24.3576	23.4076	24.7034	25.5643	25.0242	25.4378	100	25.2088	25.0807	24.6463	25.6557	25.9102	23.4992	24.704	23.7768	25.1181	24.6783	20.1974	25.2643	25.2566	24.9809	100	24.5207	0.717275	0.144314	2.1546	1.10742
A2M	Alpha-2-macroglobulin	24.45	25.8833	26.5836	24.9382	25.7108	26.2222	25.5442	26.0753	100	25.676	25.5142	26.9686	26.6527	25.9451	25.1288	26.6952	25.1474	25.6212	25.6259	26.4511	26.031	25.8074	25.6159	100	25.9388	0.562343	0.249999	0.843916	-0.244829
ABI3BP	Target of Nesh-SH3	21.8773		16.8284	19.0082	17.2318		16.0893	17.6098	75	18.1075	18.6178	17.744		19.708	18.9921	18.4273	19.1304	18.268	19.1201	19.4	16.9244		18.3767	84.6154	18.6099	0.191366	0.718136	1.81545	0.86033
ACTN1	Alpha-actinin-1		17.6357	17.839	18.8493	18.758	19.4724	19.8792	18.2654	87.5	18.6713	15.8973	17.4332	16.8937		18.6154	16.7013	20.6483		16.4961	16.2985	18.3992	14.7398	17.5329	84.6154	17.2414	0.0209186	1.67947	1.62637	0.701656
ACTN4	Alpha-actinin-4	18.7075	17.638	18.7806	18.4399	17.7817		18.708	18.3599	87.5	18.3451		18.5906			18.746	17.4944	20.1668				18.0572		17.8185	46.1538	18.4789	1	0	0.770766	-0.375635
ACTR2	Actin-related protein 2		18.5813	17.6731	18.0109	17.8582	17.9446	18.715	17.1062	87.5	17.9842	17.256	17.6549	17.5588		17.3011	16.7428	20.6807			17.9885	18.4017		17.9543	69.2308	17.9488	0.427263	0.369305	0.735419	-0.443362
ACTR3	Actin-related protein 3			16.3589	17.0818	16.68		17.8851	17.1072	62.5	17.0226	16.3223	17.2351	16.1314	15.2907	17.6089	16.1354	18.6256	16.0797	16.4112	17.8223	18.5465	15.6381	17.6751	100	16.8863	0.587715	0.230833	0.899259	-0.153191
ADIPOQ	Adiponectin			21.5662						12.5	21.5662	19.6127	20.7953	20.2164	20.7466			19.3193	19.7397		18.9914	20.2075	20.4052	20.2135	76.9231	20.0247	0.113846	0.943681	2.70834	1.43741
AFM	Afamin	24.4715	19.3782	17.1425	17.2737	18.1864	19.1044	18.565	18.2229	100	19.0431	18.5524	17.9336	19.7966	18.259	17.2621	17.7983	17.8599	18.6668	18.1296	19.0824	18.4867	18.6077	17.8901	100	18.3327	0.612194	0.213111	8.82722	3.14196
AGT	Angiotensinogen	20.87	21.4001	21.5406	20.4107	21.0272	22.3541	22.1253	22.586	100	21.5392	21.4598	21.9279	21.7351	22.6853	20.6908	22.1013	21.2148	22.3424	21.5293	22.5506	22.2115	22.0814	22.2212	100	21.904	0.346465	0.460341	0.821269	-0.284073
AHSG	Alpha-2-HS-glycoprotein	24.3378	24.916	24.8839	27.3176	25.3299	23.4794	24.8269	25.5481	100	25.0799	25.6184	25.8821	25.2649	26.5305	27.2334	25.1281	24.9609	26.0915	25.8693	25.9185	25.3949	25.2413	25.1212	100	25.7119	0.0425828	1.37077	0.785228	-0.348817
AK1	Adenylate kinase isoenzyme 1			17.2592	17.4452	16.1534			15.8089	50	16.6666	15.0971	15.4034	18.6421		17.2275	16.3941	20.0173		15.9062				15.7142	61.5385	16.8002	0.610385	0.214396	0.489232	-1.03141
ALB	Albumin;	26.968	28.8924	28.1866	27.5708	28.8311	28.7868	28.4837	28.3045	100	28.253	29.0606	28.5938	27.972	28.9211	27.9174	28.5463	28.2334	29.2485	28.767	29.0476	28.6867	28.5206	28.2557	100	28.5978	0.277342	0.556985	0.824219	-0.2789
ALDH1A1	Aldehyde dehydrogenase 1A1			16.252	16.4925	17.2573				37.5	16.6673			19.2779		16.7109	17.5543	21.818	16.7504	15.3873	19.4416	17.3439		15.8965	69.2308	17.7979	0.309177	0.509793	0.1713	-2.5454
ALDOA	Fructose-bisphosphate aldolase A		20.1628	21.0025	19.3883	20.5184	20.6091	20.744	20.487	87.5	20.416	20.1492	21.3166	23.2421	19.6205	19.502	20.192	23.4102	19.9978	20.1385	21.2957	21.7556	19.3468	20.6505	100	20.8167	0.905383	0.0431677	0.49992	-1.00023
AMBP	Protein AMBP	27.5466	22.2734	22.2061	21.6648	22.2861	22.6919	21.7696	22.6471	100	22.8857	22.8005	22.1368	22.564	22.2084	22.0499	23.1926	21.403	21.8167	22.4861	22.2248	21.5816	21.7463	21.8783	100	22.1607	0.346465	0.460341	5.8145	2.53965
ANXA1	Annexin A1			18.0108	18.3965	18.4695	18.9447	19.1016	18.3617	75	18.5475	17.8305	18.0889	17.1546	17.1713	18.2766	17.4813	19.3505	17.0157	17.0718	19.0177	19.1009	16.6548		92.3077	17.8512	0.0918238	1.03704	1.38111	0.465831
ANXA2;ANXA2P2	Annexin A2;Putative annexin A2-like protein	16.0511		18.1378	20.6621	16.224		15.1326	16.9067	75	17.1857	18.7645	17.9671	17.8789	18.5812	20.4643	18.1239	21.4759	18.7261	18.4566	20.8026	20.0166	17.8304	18.3185	100	19.0313	0.0352966	1.45227	0.476891	-1.06827
ANXA3	Annexin A3				15.8906	16.4032	16.7142	18.0662	17.7124	62.5	16.9573
ANXA5	Annexin A5			15.979	18.2941	16.753		17.0115	16.7189	62.5	16.9513	16.4999	16.0618	16.2816	16.0123	17.8201	17.3247	19.172	16.0408	17.9923	19.0515	16.9895	16.0706		92.3077	17.1097	0.916051	0.0380803	0.747832	-0.419214
ANXA6	Annexin A6			15.4716	16.1508	16.0698		16.2826	15.6112	62.5	15.9172			15.496		15.8469		17.5468				16.1947		16.0027	38.4615	16.2174	0.347208	0.459411	0.724353	-0.465235
APCS	Serum amyloid P-component	20.6744	22.8984	22.3118	23.3283	21.9596	22.7679	21.7843	22.7128	100	22.3047	19.9311	21.5675	22.7309	20.5685	23.3218	22.1508	21.1947	19.1873	21.0678	18.6907	19.3935	21.7072	21.9116	100	21.0325	0.0247655	1.60615	1.84052	0.880111
APOA1	Apolipoprotein A-I	28.2228	23.9996	25.9925	24.7272	25.761	27.1536	25.952	25.7033	100	25.939	25.6451	26.2718	26.2491	26.4751	24.8724	26.2669	25.606	24.8147	25.1752	24.4359	26.0709	25.4853	25.3813	100	25.5961	0.612194	0.213111	1.69258	0.759227
APOA2	Apolipoprotein A-II	23.8458	20.5174	21.2014	20.4558	21.0099	23.6526	22.3744	22.7684	100	21.9782	20.2523	22.0598	23.4553	21.3191	20.8033	21.2256	20.7654	20.6153	21.0277	19.8651	21.7061	21.7191	21.3794	100	21.2457	0.346465	0.460341	1.95745	0.968973
APOA4	Apolipoprotein A-IV	25.4211		18.4545	19.4312	19.226	19.0707	19.5554	19.2207	87.5	20.0542	19.2446	20.3613	19.9192	20.4723	19.7213	20.5123	19.7065	18.44	19.2928	18.5994	17.8762	18.4443	17.9893	100	19.2753	0.968395	0.0139475	9.12173	3.18931
APOB	Apolipoprotein B-100	21.1853	23.4083	23.8073	24.3173	23.8281	24.0761	24.5744	24.0908	100	23.661	22.4982	24.1428	24.1049	24.037	24.2636	23.9518	22.8757	23.4848	23.5092	23.2904	23.5599	24.4765	23.7483	100	23.6879	0.562343	0.249999	1.07924	0.110022
APOC1	Apolipoprotein C-I			20.4098	19.332	19.4766		20.8329	20.0395	62.5	20.0182	20.1308	20.4593	19.8854	20.5712	19.7423	19.2759	18.8663	19.5529	20.0048	19.3578	19.8005	20.6744	19.8208	100	19.8571	0.657348	0.182205	1.13584	0.183754
APOC3	Apolipoprotein C-III	23.9366	19.165	19.2576	18.9621	18.5082	19.7292	19.2025	19.8755	100	19.8296	19.1199	19.2789	20.3489	19.6308	18.6459	20.3641	18.3423	17.6276	18.3189	17.9447	18.7774	19.4608	18.9279	100	18.9837	0.192379	0.715841	4.23675	2.08296
APOD	Apolipoprotein D	24.2484	22.1593	22.0419	21.5446	21.5759	21.9697	22.3411	22.5538	100	22.3043	21.4713	22.5183	22.2827	23.7942	21.8077	21.8161	20.9047	21.4536	20.9755	21.1401	21.7245	21.4241	20.973	100	21.7143	0.0425828	1.37077	1.54053	0.623427
APOE	Apolipoprotein E	26.0439	22.4609	22.3717	22.2661	21.624	21.6007	21.9704	21.672	100	22.5012	22.2323	21.7262	22.8833	23.0137	22.3736	21.842	20.4036	22.5945	21.7271	22.2973	21.9232	22.0889	21.7179	100	22.0634	0.828004	0.0819675	2.60113	1.37914
APOH	Beta-2-glycoprotein 1	24.8044	24.7054	22.2058	22.8224	23.7023	22.4614	22.6841	23.1723	100	23.3198	24.7497	22.5349	21.4937	23.2608	22.1772	22.47	21.8186	24.3864	24.0395	23.7651	22.4974	22.4303	22.7349	100	22.9506	0.384821	0.414741	1.27213	0.347241
APOL1	Apolipoprotein L1	22.2556	20.6114	21.3165	20.2855	20.5447	21.3387	21.1896	20.9004	100	21.0553	20.3955	20.9158	20.946	20.8499	20.5699	20.9745	19.5359	20.4691	20.5952	19.908	20.8343	21.1123	20.845	100	20.6116	0.128301	0.891769	1.42606	0.51204
APOM	Apolipoprotein M	24.1821	19.631	18.9843	20.0979	19.2903	19.4991	19.6291	19.8979	100	20.1515	18.6558	19.6757	19.3807	20.1158	20.3053	18.8045	18.4719	19.0427	19.4764	18.9134	20.1542	20.3893	20.1602	100	19.5035	0.612194	0.213111	3.75807	1.90999
ARF3;ARF1;ARF5	ADP-ribosylation factor 3;ADP-ribosylation factor 1;ADP-ribosylation factor 5		17.7283	17.6754	19.6577	17.9712		17.8013	17.2314	75	18.0109	17.0105	17.8088	17.388	16.9749	19.4691	17.186	21.1408		18.0781	17.5702	17.4769		18.2295	84.6154	18.0303	0.615303	0.210911	0.721428	-0.471073
ARHGDIA	Rho GDP-dissociation inhibitor 1		18.2798	17.3736	18.2071	17.2234		17.0763	17.0702	75	17.5384		18.0071	16.5561		17.6394	17.1468	20.0087	16.633	16.6865	17.1589	17.0392		17.1973	76.9231	17.4073	0.278076	0.555837	0.846045	-0.241194
ARHGDIB	Rho GDP-dissociation inhibitor 2		19.9018	19.37	19.4951	20.1041	19.9174	20.2884	19.4859	87.5	19.7947	18.224	19.8024			19.4825		20.0469				18.82		17.9079	46.1538	19.0473	0.0864763	1.0631	1.49417	0.579346
ARPC2	Actin-related protein 2/3 complex subunit 2			17.7999	17.468	17.5701	17.2699	18.8897	17.2649	75	17.7104		17.8044			17.1894	17.2412	19.7941		16.8514	17.3902	18.2159		17.2987	61.5385	17.7231	0.605577	0.217831	0.852463	-0.230291
ATRN	Attractin	22.7529	20.1883	19.4659	18.388	19.435	20.0746	19.6435	19.9989	100	19.9934	20.3576	20.1444	20.9042	20.8281	18.422	20.0817	19.2452	20.2148	19.7825	20.205	20.1024	20.1498	19.8682	100	20.0235	0.218266	0.661014	1.41109	0.496807
AZGP1	Zinc-alpha-2-glycoprotein	27.5633	22.4101	21.2954	20.9214	21.7362	22.8375	21.8007	21.9041	100	22.5586	22.4623	21.8632	22.2984	23.3228	21.3796	22.4454	21.4115	22.1329	22.1297	22.9018	21.6246	21.233	21.8054	100	22.0777	0.772059	0.11235	5.86891	2.55309
BCHE	Cholinesterase	20.9195	18.2712	17.7956	16.4185	17.8943	17.1274	18.1351	18.6559	100	18.1522	17.736	18.0926	18.1454	17.9762	16.8243	17.3716	16.7917	17.4347	18.0614	17.5342	18.9294	18.255	18.3251	100	17.806	0.612194	0.213111	1.86524	0.899358
BGN	Biglycan	18.1895		17.6144	21.9047	20.055		15.4591		62.5	18.6445		16.8923	17.7638		21.0975	18.3006	22.6708		16.1861			15.5907	18.152	61.5385	18.3317	0.883617	0.0537357	0.889329	-0.169211
BLVRB	Flavin reductase (NADPH)		19.7483	20.252	21.0834	20.5322	17.3438	18.1453	18.4843	87.5	19.3699	18.4805	18.0538	20.4859	17.9096	20.9832	20.9353	20.5139	17.9081	19.0371		17.6801		17.8087	84.6154	19.0724	0.556074	0.254868	1.14888	0.200231
BTD	Biotinidase		17.931			16.6227	17.6621	18.2404	17.9988	62.5	17.691		17.9724	18.8103	18.4649			18.2083	18.5883	18.441	18.7493	17.9876	18.425	17.0033	76.9231	18.265	0.0500435	1.30065	0.681551	-0.553107
C1QA	Complement C1q subcomponent subunit A	21.3156	21.9249	22.1263	22.552	21.4399	22.8957	21.6974	21.605	100	21.9446	20.9892	21.527	21.9186	21.0263	22.3573	21.8489	20.7937	21.3372	20.8542	20.2836	20.7502	21.2466	21.9959	100	21.3022	0.0298089	1.52565	1.54162	0.624451
C1QB	Complement C1q subcomponent subunit B	20.3395	21.7208	22.4564	22.2077	21.7501	22.5446	21.1381	22.0262	100	21.7729	21.7191	21.914	22.1996	21.3168	22.4013	21.7299	20.8853	21.6594	21.608	21.115	21.108	21.6885	21.5854	100	21.61	0.168824	0.772566	1.18469	0.24451
C1QC	Complement C1q subcomponent subunit C	19.0608	22.544	22.8052	22.6729	22.0665	21.6241	21.6132	22.3906	100	21.8472	22.1011	22.5118	21.5761	21.8407	22.6695	21.6733	20.9492	22.3498	21.9891	21.5432	21.4147	22.0611	22.2665	100	21.9189	0.346465	0.460341	1.10994	0.150488
C1R	Complement C1r subcomponent	19.8951	20.5442	20.8238	20.5184	20.4475	20.8538	20.5146	21.229	100	20.6033	20.1178	20.4364	20.9519	20.305	20.0876	20.4154	19.8981	20.0772	20.8886	19.5204	19.6815	20.5752	20.7109	100	20.282	0.128301	0.891769	1.23527	0.304828
C1S	Complement C1s subcomponent	19.7228	21.9517	21.5764	21.2218	21.2337	21.8338	20.9614	21.8327	100	21.2918	21.0354	21.3318	21.2378	20.8811	21.1912	21.5542	20.5592	20.6847	21.3639	20.1502	20.4163	21.4417	21.2272	100	21.0057	0.147501	0.831204	1.28318	0.359724
C2	Complement C2	21.253	21.8914	21.8282	20.7786	21.6796	21.8754	21.4379	21.8789	100	21.5779	22.3538	21.7959	21.6413	22.0883	21.0448	22.1777	21.3281	22.2582	22.2155	22.5926	22.3161	21.9054	21.7289	100	21.9574	0.0597088	1.22396	0.761235	-0.393586
C3	Complement C3	24.4453	26.377	26.3439	26.0248	25.8691	25.9458	26.1636	26.2674	100	25.9296	26.1481	26.1457	26.3676	25.7214	26.0914	25.9829	25.5203	25.749	26.0567	24.7994	25.6648	26.2993	25.8955	100	25.8802	0.346465	0.460341	1.06757	0.0943275
C4A	Complement C4-A	23.0593	24.895	24.7788	24.9076	24.3384	24.9104	24.3799	24.9593	100	24.5286	24.151	24.0891	25.2026	24.3553	24.7841	24.2713	23.209	23.9989	24.0361	23.7634	23.7148	24.6122	24.3605	100	24.196	0.0702156	1.15357	1.27394	0.349293
C4B	Complement C4-B	22.6424	24.1212	22.9918	22.5315	22.7346	24.3078	22.9345	23.7101	100	23.2467	22.6914	23.4641	23.4689	23.4945	22.9978	23.9551	23.2601	23.17	22.6586	22.5595	22.1991	23.4789	23.0594	100	23.1121	0.942267	0.025826	1.1627	0.217481
C4BPA	C4b-binding protein alpha chain	20.0946	23.7705	22.6729	23.1241	22.7812	23.5104	22.5581	23.0619	100	22.6967	22.4811	22.5522	22.717	22.8336	23.1007	23.1605	21.593	22.0068	22.2146	21.8106	22.4893	22.6632	22.6776	100	22.4846	0.111103	0.954274	1.32894	0.410273
C4BPB	C4b-binding protein beta chain	22.3094		20.7329	20.8937			20.1691	20.4856	62.5	20.9181	19.3812	20.0751	20.734	20.6229	19.9788	20.4922		19.5914	20.0074		20.6219	19.878	20.1403	84.6154	20.1385	0.0360971	1.44253	1.91804	0.939635
C5	Complement C5	22.1508	24.237	24.528	23.9897	23.7396	24.4388	24.005	24.1239	100	23.9016	23.437	23.8962	24.1797	23.3943	23.9129	23.792	23.119	23.3922	23.7302	23.77	23.8946	24.3439	24.2813	100	23.7803	0.147501	0.831204	1.15511	0.208029
C6	Complement component C6	18.7872	20.7981	21.4805	21.1489	20.597	21.2582	21.2153	21.755	100	20.88	20.9125	21.0112	21.2043	21.2027	20.85	21.5827	20.3522	20.247	21.0583	20.8713	21.0773	21.4736	21.0344	100	20.9906	0.562343	0.249999	1.02462	0.0350903
C7	Complement component C7		21.8095	23.4823	22.2102	22.176	22.2265	21.9408	21.8044	87.5	22.2357	22.1319	23.1966	21.9088	22.8013	21.9578	22.4869	21.489	21.758	21.9635	22.5232	21.7115	22.5402	21.5765	100	22.1573	0.721397	0.141826	1.07913	0.109871
C8A	Complement component C8 alpha chain	18.8221	21.3519	21.5575	22.2377	21.3759	21.7172	20.8341	21.5199	100	21.1771	21.02	20.8523	21.635	21.0167	22.1242	21.3878	20.8281	20.49	20.9308	20.2336	20.6732	21.4516	21.1497	100	21.061	0.218266	0.661014	1.19762	0.26017
C8B	Complement component C8 beta chain	18.9068	20.8938	21.1353	21.5327	20.8467	21.1776	20.7347	21.2739	100	20.8127	20.8872	20.5483	21.1001	20.6913	21.5575	20.8193	20.2535	20.2951	20.8947	20.2091	20.3609	21.2506	20.7393	100	20.739	0.218266	0.661014	1.12146	0.165372
C8G	Complement component C8 gamma chain		21.9544	22.3837	22.2268	21.6768	20.598	20.8852	21.3873	87.5	21.5875	21.8104	21.4992	21.9501	21.1527	22.2924	21.5834	20.6151	20.5096	21.2559	20.5518	20.4506	21.3501	20.8904	100	21.224	0.19104	0.718875	1.29559	0.373612
C9	Complement component C9	22.3543	22.5046	22.5042	23.466	22.1095	22.0479	22.6357	22.7884	100	22.5513	21.3966	22.2521	21.9221	21.448	23.0526	22.1744	20.371	21.5242	21.9405	20.975	21.7517	22.2943	22.4074	100	21.8085	0.00913008	2.03953	1.58649	0.66584
CA1	Carbonic anhydrase 1		22.6152	23.1374	19.8658	24.2682	21.1481	20.887	21.6618	87.5	21.9405	21.5922	20.9385	23.6012	16.7502	19.768	24.5077	22.9955	20.8242	22.0335	17.2267	22.5796	19.8501	20.5744	100	21.0186	0.321912	0.492263	1.2455	0.316723
CA2	Carbonic anhydrase 2		20.2173	19.9711	17.8342	20.9003	19.4822	18.6833	19.2788	87.5	19.481	18.5747	18.4126	21.16		17.4349	20.9755	20.9406	18.2062	19.1599	14.9821	19.1799	17.1283	17.8235	92.3077	18.6648	0.236724	0.625758	1.15729	0.210752
CALR	Calreticulin			17.0227	17.269	16.6386	16.4691	16.3606		62.5	16.752	15.8351	17.2513	15.3209	15.7545	17.2572		18.9701				17.0091			53.8462	16.7712	0.807541	0.0928354	0.714588	-0.484817
CAND1	Cullin-associated NEDD8-dissociated protein 1		16.6854	16.4556	18.0829	16.5698	15.6422	16.4432		75	16.6465		16.2831	16.3248		17.7469	16.6655	18.7877		15.8453	15.645	16.9335		16.6006	69.2308	16.7592	0.906186	0.0427828	0.837141	-0.256458
CAP1	Adenylyl cyclase-associated protein 1		19.1306	18.7619	18.888	18.6445	18.0863	20.0869	18.5955	87.5	18.8848	17.7346	18.4521	18.0678	15.5892	18.6069	17.6626	20.972	18.0308	17.5185	19.3913	18.2526	16.5288	18.4513	100	18.0968	0.0293183	1.53286	1.25609	0.328941
CAPG	Macrophage-capping protein			17.0505	16.6406			17.157		37.5	16.9494	17.2533	17.0651	17.955			16.2386	21.5393	16.5108		19.0456	19.5635		16.4721	69.2308	17.9604	0.517535	0.286061	0.222734	-2.1666
CAPZA1	F-actin-capping protein subunit alpha-1			17.6634	17.8824	17.5678	16.3776	17.0877		62.5	17.3158			16.3447		17.2128	17.5187	19.988							30.7692	17.766	0.806496	0.0933978	0.474669	-1.07501
CAT	Catalase	15.3188	20.708	20.719	19.0073	22.3356	20.7975	20.4569	20.5577	100	19.9876	19.4385	19.4081	21.8375	15.6241	18.9567	22.056	21.8414	19.2069	20.0048	15.936	22.1483	17.8539	19.8994	100	19.5547	0.468939	0.328884	1.07034	0.0980695
CCT6A	T-complex protein 1 subunit zeta		15.9513	15.763	16.5258	15.705		15.419	16.0377	75	15.9003					16.8202	15.0341	16.5695							23.0769	16.1412	0.438578	0.357953	0.766324	-0.383973
CD109	CD109 antigen			16.6291	15.9838	16.3271				37.5	16.3134	16.737				16.199		18.0414	17.0834	16.9609	19.2909	19.0506	15.9771	17.341	69.2308	17.409	0.116032	0.935424	0.348913	-1.51906
CD14	Monocyte differentiation antigen CD14	22.5161	18.6964	18.5559	19.0966	18.2209	19.602	18.9106	18.458	100	19.257	19.5072	18.6911	18.5727	20.1028	18.8621	18.7109	18.3583	19.8068	18.9355	20.9714	20.9023	18.7623	19.8916	100	19.3904	0.346465	0.460341	1.40566	0.491251
CFB	Complement factor B	23.8394	24.7874	24.4614	23.2521	24.2179	24.5045	24.1939	24.4743	100	24.2164	24.4921	24.1494	24.5382	24.4798	23.5005	24.3831	23.8541	23.9793	24.3984	23.6455	24.1943	24.5427	23.9216	100	24.1599	0.717275	0.144314	1.05791	0.0812212
CFD	Complement factor D		18.6948	17.6462	18.537	17.5883	17.602	18.1177	18.9202	87.5	18.158	20.558	19.0725	18.1495	21.3992	19.2524	19.4351	18.4877	21.0776	19.6967	20.8068	19.1224	18.7268	17.741	100	19.502	0.00625929	2.20347	0.312982	-1.67585
CFH	Complement factor H	22.7082	23.6771	23.3936	22.5964	23.4638	23.5932	23.0597	23.893	100	23.2981	23.378	23.4648	23.5136	23.3733	22.604	23.7542	22.6731	23.5055	23.4453	23.1306	23.5345	23.4268	23.173	100	23.3059	0.828004	0.0819675	1.01523	0.0218102
CFI	Complement factor I	21.8549	22.2376	21.634	20.6788	21.1974	21.192	21.8508	22.4306	100	21.6345	22.1789	21.8883	21.9847	22.3165	21.0302	21.8939	20.9528	22.2207	22.132	21.889	22.2442	22.427	21.8444	100	21.9233	0.218266	0.661014	0.842737	-0.246845
CFL1	Cofilin-1		20.3894	20.4645	18.8964	20.1255	19.6984	20.0066	19.9024	87.5	19.9262	18.4508	20.1823	20.0682	17.0509	19.3453	19.0766	22.1856	18.0836	19.2573	19.4292	18.5621	17.5207	19.474	100	19.1297	0.0522036	1.2823	1.16593	0.221484
CHI3L1	Chitinase-3-like protein 1			16.5679	16.6313	16.8611		17.8244	16.9444	62.5	16.9658	18.3634	16.1798	15.1376	19.0745	17.0728	15.9813	16.5355	17.7307	18.902	19.703	20.0471	16.2341	18.3452	100	17.639	0.587715	0.230833	0.403862	-1.30806
CLEC3B	Tetranectin;		19.2261	18.9084	19.6289	18.7445	16.8901	18.3405	18.9024	87.5	18.663	20.3405	19.9324	19.529	21.1931	20.1178	19.3726	18.5034	20.0003	19.4408	20.4415	18.8084	19.109	18.0641	100	19.6041	0.0433115	1.3634	0.504053	-0.988352
CLTC	Clathrin heavy chain 1		17.4721	18.4632	19.3237	17.4096	15.2646	17.6718	16.8101	87.5	17.4879	16.3675	18.5921	16.0115	15.4804	18.8896	16.5989	21.7444			17.2276	16.5419		19.198	76.9231	17.6652	0.769698	0.11368	0.447783	-1.15913
CLU	Clusterin	29.2217	23.6281	24.1521	25.2512	23.9017	24.1341	23.5588	24.3165	100	24.7705	24.3412	24.1323	24.8949	25.2855	25.1665	25.1327	23.7962	24.6406	24.3304	23.9733	22.5335	24.1015	23.5148	100	24.2956	0.884836	0.0531372	4.13621	2.04831
CNDP1	Beta-Ala-His dipeptidase			16.6771	17.3646	16.9894	17.0429		18.5183	62.5	17.3185	18.1737	17.7173	17.8845	16.9857	16.9589	17.9594	18.141		17.2532	18.1288	17.9183	18.0415	18.331	92.3077	17.7911	0.246252	0.608621	0.771331	-0.374578
COL12A1	Collagen alpha-1(XII) chain			18.5307	20.0962	17.4356	19.0663	17.9034		62.5	18.6064	16.34	17.6418		16.904	20.0575	17.4964	18.6269		18.6123			17.8398	19.7749	69.2308	18.1437	0.463355	0.334086	1.2275	0.29572
COL14A1	Collagen alpha-1(XIV) chain		14.9212	13.815	15.6829	15.8435		12.4735		62.5	14.5472		14.1205	14.552		16.3864	16.1831	22.7035		11.7649				13.3192	53.8462	15.5757	0.684743	0.164472	0.0322954	-4.95253
COL1A1	Collagen alpha-1(I) chain	17.6085	19.9659	23.1741	23.4038	21.3445	22.6017	21.8763	19.5419	100	21.1896	21.2986	21.5154	20.8836	20.8939	23.7886	21.8749	21.9596	19.3408	22.2877	19.1667	20.5793	22.177	23.7427	100	21.5007	0.942267	0.025826	0.982541	-0.0254108
COL1A2	Collagen alpha-2(I) chain	18.3045	18.7203	22.7721	22.2093	20.6771	21.6347	21.0778	18.6095	100	20.5006	20.7089	21.3881	21.232	20.577	22.3023	21.6818	22.1293	18.2665	21.2953	18.3418	18.7878	21.6084	23.0509	100	20.8746	0.663908	0.177892	0.888054	-0.171281
COL3A1	Collagen alpha-1(III) chain		19.2997	22.6762	19.3658	20.1335	22.2389	21.5823	19.5627	87.5	20.6941	20.4126	21.0812	17.8136	20.585	19.4384	21.3973	20.8143	19.512	21.2014	19.3201	20.1296	21.2312	22.8114	100	20.4422	0.842961	0.0741924	1.31276	0.392602
COL5A1	Collagen alpha-1(V) chain	19.1407		18.2941	18.725	17.5886	19.0714	18.9168	17.7968	87.5	18.5048	18.9937	18.0456		19.083	18.9278	18.8128	19.0847	16.9331	19.8873	18.3472	18.438	18.989	20.1163	92.3077	18.8049	0.352542	0.452789	0.762391	-0.391398
COL6A1	Collagen alpha-1(VI) chain	16.4717		18.4788	22.513	17.7935	18.7559	18.8728	17.3724	87.5	18.6083	19.0103	18.3769	16.0566	19.051	22.0198	19.6984	18.0016	16.4799	19.7625	18.7699	18.9647	19.8507	20.6193	100	18.974	0.250547	0.601111	1.27094	0.345899
COL6A2	Collagen alpha-2(VI) chain			14.8174	22.5618		14.2441			37.5	17.2078	15.6293	15.2945		16.915	22.3552	14.5854	16.6625		17.571	14.2138			15.8876	69.2308	16.5682	0.781511	0.107065	3.12897	1.64569
COL6A3	Collagen alpha-3(VI) chain	17.7193	17.9168	21.0115	23.6252	19.7212	20.3052	20.2988	20.1011	100	20.0874	21.5444	21.0756	19.0143	22.0286	23.3877	21.209	21.388	20.4664	21.8879	21.413	20.3764	20.524	21.7368	100	21.2348	0.0247655	1.60615	0.802043	-0.318248
COMP	Cartilage oligomeric matrix protein	19.3041		20.0109	20.0091	18.8158	18.7773	16.6679	17.7644	87.5	18.7642	21.3755	20.1038	18.3676	20.8542	20.4366	20.5037	21.1693	21.9781	22.4063	21.023	19.0511	20.2384	21.0858	100	20.661	0.00296244	2.52835	0.273151	-1.87223
CORO1A	Coronin-1A			18.7094	18.6915	20.3534	19.4394	21.6595	19.2954	75	19.6914	18.6214	18.1421			18.322		18.278	17.5339		17.8579	17.6556		18.1824	61.5385	18.0742	0.00194577	2.71091	4.02959	2.01063
CP	Ceruloplasmin	21.4697	24.1057	24.6823	22.906	23.5843	23.6388	23.605	23.9396	100	23.4914	23.9314	24.273	24.1161	24.123	23.1845	23.8897	22.9058	24.0326	23.4224	23.7796	23.7849	23.9349	23.9538	100	23.7947	0.425667	0.37093	0.917607	-0.124052
CPB2	Carboxypeptidase B2		19.1923	19.1208	19.2263	19.4141	19.2024	18.928	19.5749	87.5	19.237	18.4706	18.5731	19.471	18.4955	18.999	19.6202	19.5242	18.9215	19.2501	18.9716	18.6281	19.7133	19.2365	100	19.0673	0.552297	0.257827	1.0879	0.121547
CPN1	Carboxypeptidase N catalytic chain		19.958	19.7975	18.3867	19.8299	19.8796	19.4353	20.2744	87.5	19.6516	19.4332	19.4486	19.5857	19.6015	18.9226	19.7038	18.4294	19.1946	19.6408	19.6992	20.1741	19.8513	20.0475	100	19.5179	0.284719	0.545584	1.12005	0.163568
CPN2	Carboxypeptidase N subunit 2	24.2289	20.4187	20.7538	19.2263	20.9965	21.4231	20.5853	21.5978	100	21.1538	20.2651	20.9539	21.1335	21.2964	19.6184	20.5713	19.5437	20.1497	19.4566	20.6927	20.7674	20.4512	20.9632	100	20.451	0.192379	0.715841	2.67108	1.41742
CRP	C-reactive protein	19.3387	24.2197	24.0479	21.1689		22.1627	19.4762	20.669	87.5	21.5833	17.5036	19.892		17.457	20.9708	18.9066		19.2695			17.4752	18.6543	21.454	69.2308	19.0648	0.0172352	1.76358	7.56699	2.91972
CRTAC1	Cartilage acidic protein 1			18.9216	19.4461	17.7297	15.9351	16.3902	20.5866	75	18.1682	23.0867	20.627	20.4719	22.4391	20.2552	19.9593	19.7432	23.8735	21.368	23.6888	19.7352	20.3083	17.1744	100	20.9793	0.0109758	1.95956	0.124752	-3.00286
CTSB	Cathepsin B			17.6987	18.8889	17.8866		17.4473	17.748	62.5	17.9339	17.5492	18.3222	17.7729	18.2688	18.909		18.808	18.2973	17.6808	20.1663	20.156	17.4057	19.7655	92.3077	18.5918	0.246252	0.608621	0.540002	-0.888965
CTSD	Cathepsin D		18.4367	17.7243	19.9552	16.5052		16.7788		62.5	17.8801	17.556	17.3281	21.0343	18.0643	20.2381		21.0419	17.5557	17.1491	19.6729	20.3911	17.1121	18.4995	92.3077	18.8036	0.246252	0.608621	0.466008	-1.10157
CTSG	Cathepsin G			17.7713	20.7864	19.2201		20.5698	20.7732	62.5	19.8242		18.617			20.1448									15.3846	19.3809	0.438578	0.357953	1.53497	0.618212
DCN	Decorin	17.1113	16.3288	16.562	19.3408	17.9728			14.7484	75	17.0107		15.6509	16.5948	14.5664	19.5677	17.3071	22.3689					15.7186	15.8906	61.5385	17.2081	0.796253	0.0989487	0.254708	-1.97308
DPYSL2	Dihydropyrimidinase-related protein 2		14.7581	16.8425	14.466	14.0918		13.5056	14.1714	75	14.6393	14.6121	17.2	15.1907		15.5354	14.4728	21.3138	15.14		16.8305	16.491		16.1705	76.9231	16.2957	0.0300596	1.52202	0.111894	-3.1598
ECM1	Extracellular matrix protein 1	21.7895			19.9727			18.5448	19.0065	50	19.8284	18.8582	18.6441	18.647	19.1247	18.6778	18.9887			19.4958	19.0858	19.1481	19.0635	18.8232	84.6154	18.9597	0.433422	0.363089	2.68624	1.42559
EEF1A1P5;EEF1A1	Putative elongation factor 1-alpha-like 3;Elongation factor 1-alpha 1		20.0891	21.0741	21.5491	20.1338	16.8144	18.782	19.6323	87.5	19.725	19.0589	20.8865	19.403	18.2032	20.9459	19.8215	22.9634	18.7366	19.6915	19.7417	19.1738	18.6803	20.5154	100	19.8324	0.662956	0.178515	0.859512	-0.21841
EEF2	Elongation factor 2	15.5135	18.2481	18.2732	19.4663	16.8153	15.8236	16.742	16.3427	100	17.1531	15.3163	18.3486	16.2932	14.5666	18.1593	16.2316	21.3567	15.8612	16.8757	16.6396	17.1058	16.1735	18.9877	100	17.0704	0.772059	0.11235	0.630351	-0.665774
EFEMP1	EGF-containing fibulin-like extracellular matrix protein 1			18.4186	18.5547	17.3217	18.6965	17.6739	17.4226	75	18.0147	19.7675	19.0674	17.6756	20.1584	19.2216	18.7782	18.1973	19.8861	18.5764	19.5491	17.6765	17.4613	18.6039	100	18.8169	0.0352966	1.45227	0.521602	-0.938979
ENO1	Alpha-enolase	18.6125	20.963	21.3874	20.9622	21.0471	19.6722	21.072	20.5169	100	20.5292	20.24	21.204	20.8209	19.8197	20.8667	20.3651	22.9566	19.6458	20.4771	21.1314	21.909	19.4521	20.9702	100	20.7583	0.942267	0.025826	0.777764	-0.362596
F12	Coagulation factor XII	18.0611	18.8532	19.6904	19.013	18.9506	19.9976	19.1354	21.4024	100	19.388	18.8648	19.7613	20.6845	19.1152	19.4834	19.9651	19.4411	20.4195	20.3168	20.3183	20.9108	21.1576	21.3654	100	20.1387	0.0702156	1.15357	0.66682	-0.584632
F13A1	Coagulation factor XIII A chain			16.44	18.8385	16.6851		16.7744	16.5987	62.5	17.0674	16.6321	16.769	16.6325		17.8073	16.6796	18.8057	15.4554	17.1766	17.0118	17.8551	18.2824	18.3907	92.3077	17.2915	0.460597	0.336679	0.899791	-0.152338
F13B	Coagulation factor XIII B chain		19.4514	19.2989	18.7146	19.1674		18.7016	19.1599	75	19.0823	18.9752	19.1211	19.467	19.188	18.2292	19.3062		19.0858		19.0134	19.5646	19.1403	19.4569	84.6154	19.1407	0.687673	0.162618	0.953831	-0.068194
F2	Prothrombin	20.9742	22.7814	22.477	24.1482	21.5411	22.2845	22.3286	22.9486	100	22.4355	22.5695	22.1196	22.6743	23.1878	24.0294	22.8192	21.4073	21.9089	21.8854	20.5976	20.3294	22.3759	22.0878	100	22.1532	0.514539	0.288582	1.19726	0.259742
F5	Coagulation factor V	24.7196	20.1398	20.3028	19.7851		19.346		19.6897	75	20.6638		16.421	19.8285		20.8952	19.6349							19.7612	38.4615	19.3082	0.465209	0.332352	5.79587	2.53503
F9	Coagulation factor IX	18.125	19.2119	19.1416	21.6183	18.7291	19.0726	19.6082	20.1143	100	19.4526	17.7021	19.5178	19.9647	18.4013	21.4605	19.5752	18.2922	18.1981	18.9394	17.1097	18.7454	19.8601	19.1859	100	18.9963	0.384821	0.414741	1.33652	0.418477
FBLN1	Fibulin-1;		18.9965	20.1046	20.3462	18.8346	18.953	17.7744	19.1038	87.5	19.159	18.6984	19.6078	19.2145	19.0382	20.3735	19.475	18.9374	18.3134	19.0246	18.1944	18.6172	18.9029	18.8553	100	19.0194	0.662956	0.178515	1.17744	0.235654
FBP1	Fructose-1,6-bisphosphatase 1		17.1957	16.4624	16.4353			16.988		50	16.7704	16.7044	18.1116		16.0736	16.2977		20.2755	17.6284	16.8425	20.6208	20.4699		17.2928	76.9231	18.0317	0.257899	0.58855	0.214329	-2.2221
FCGBP	IgGFc-binding protein		16.1595	18.8185	15.4519	15.7445		15.8264		62.5	16.4001	16.3978	16.4118	15.5221	17.782	15.856	17.2426	16.2804	18.4987	16.8542	16.4075	17.0529	17.5965	16.5833	100	16.8066	0.126543	0.897763	1.03122	0.0443566
FCN2	Ficolin-2		19.3612				18.241	18.2589	19.1435	50	18.7511		17.7019	19.1315	18.2698	18.0061		18.1383		18.1754	18.408	18.2298	18.8314	18.2074	76.9231	18.31	0.089686	1.04728	1.38935	0.474407
FCN3	Ficolin-3		19.7281	19.9333	18.3861	19.2765	20.3356	20.036	19.9883	87.5	19.6691	19.2424	19.6654	20.1767	19.1954	18.2368	20.2418	19.2253	18.9689	19.3731	18.9259	19.9931	19.8893	19.9435	100	19.4675	0.321912	0.492263	1.15439	0.20713
FERMT3	Fermitin family homolog 3		17.6588	16.165	17.2544	16.8509		16.8248		62.5	16.9508		16.416	17.1123		16.5742	15.8746	17.6629	16.4742	16.4732	16.8384				61.5385	16.6782	0.379775	0.420473	1.20164	0.265007
FETUB	Fetuin-B				17.2689	16.6813	16.9854	18.3293	17.8824	62.5	17.4295	17.1172					16.4246		17.6046	17.7066	18.0601	17.4606	17.3259	18.3663	61.5385	17.5082	0.660549	0.180095	0.964236	-0.0525422
FGA	Fibrinogen alpha chain	26.9904	23.2731	25.1752	26.4895	24.0299	25.4915	24.6807	24.5422	100	25.0841	25.7788	25.356	22.543	25.4759	26.3529	25.6511	24.7252	24.9677	25.6183	25.2978	25.4612	25.283	26.1004	100	25.2778	0.425667	0.37093	1.05255	0.073892
FGB	Fibrinogen beta chain	22.5209	20.6551	25.1841	26.1848	23.3948	24.9304	24.2447	24.0577	100	23.8966	24.7163	25.333	21.2625	24.5556	26.2537	25.3621	23.6516	23.5767	25.1096	24.0996	25.6726	25.4393	25.7521	100	24.6758	0.192379	0.715841	0.722095	-0.469739
FGG	Fibrinogen gamma chain	22.0348	21.7413	25.8301	26.7787	24.3752	25.9488	25.216	25.0283	100	24.6192	25.5084	26.234	22.0593	25.3263	26.9629	26.0972	24.5572	24.6147	25.9904	25.1067	26.5363	26.5311	26.7317	100	25.5582	0.147501	0.831204	0.666493	-0.585338
FLNA	Filamin-A		15.7042	17.6623	19.2368	17.5636	16.0793	18.2413	16.5935	87.5	17.2973	17.2781	17.9933	18.1229		19.2199	15.2042	20.5659	17.1625	17.4759	19.9781	19.0723	16.4512	18.0198	92.3077	18.0453	0.398025	0.40009	0.513643	-0.961161
FN1	Fibronectin	15.48	22.0816	23.5198	25.6257	23.0208	23.1193	22.4357	22.8956	100	22.2723	25.7572	22.8973	22.8045	25.7334	25.6448	22.8656	24.0735	25.9585	24.7524	25.826	23.6674	23.1918	23.3667	100	24.3492	0.0247655	1.60615	0.411904	-1.27962
FTH1	Ferritin heavy chain		17.8379	19.2815	18.7822	19.185	17.9195	18.3144	15.4855	87.5	18.1152	17.4597	17.94	19.1498	16.5232	18.3766	17.5353	22.8519	16.9209	17.4393	19.463	21.8134	16.317	19.4933	100	18.5603	0.968395	0.0139475	0.319851	-1.64453
FTL	Ferritin light chain		20.114	19.6828	19.3436	18.6666			16.9462	62.5	18.9506	18.4042	16.793	18.9973	16.7102	18.6007	17.683	22.8366		17.663	19.7314	22.3623		19.9752	84.6154	19.0688	0.69173	0.160064	0.419723	-1.25249
GAPDH	Glyceraldehyde-3-phosphate dehydrogenase	19.9637	22.2428	22.5416	21.8373	22.5045	21.5541	22.3471	21.605	100	21.8245	20.3748	22.2362	23.9523	19.9471	21.5666	21.4815	24.8182	20.2859	21.028	21.1128	22.1803	20.2183	21.9883	100	21.63	0.246566	0.608067	0.723743	-0.466451
GC	Vitamin D-binding protein	26.1624	23.6282	23.0447	22.3136	22.7391	23.8263	22.9131	23.8695	100	23.5621	23.3968	23.5736	23.7746	23.5878	22.7023	23.36	22.5582	23.6134	23.3012	22.7895	23.1043	23.3363	23.1536	100	23.2501	0.612194	0.213111	1.78825	0.838551
GDI2	Rab GDP dissociation inhibitor beta		17.854	17.6513	17.2957	17.5768	14.7058	17.9451	15.7099	87.5	16.9627	16.7028	16.4329	17.1656		16.8433	15.6155	20.185	16.1945	16.7588	16.5624	18.7355		17.4687	84.6154	17.1513	0.556074	0.254868	0.683437	-0.54912
GPI	Glucose-6-phosphate isomerase		19.8879	20.195	17.5293	20.0175	19.8336	20.7086	19.867	87.5	19.7198	17.4205	20.0265	20.4663	16.7993	17.5829	19.0484	21.9249	17.3771	18.49	18.6099	20.5421	17.1252	19.1232	100	18.8105	0.19104	0.718875	1.06637	0.0927061
GPLD1	Phosphatidylinositol-glycan-specific phospholipase D	19.3978	18.0376	19.6226	18.2227	18.9056	18.652	19.2582	19.1225	100	18.9024	19.4215	19.1644	19.6672	19.3512	18.4394	19.7184	18.7794	18.3412	19.1718	19.0595	19.146	19.0068	19.3217	100	19.1222	0.346465	0.460341	0.881901	-0.181311
GPX3	Glutathione peroxidase 3		19.5165	19.3107	19.9312	20.2717	19.6842	19.5321	19.5625	87.5	19.687	19.1045	20.1336	19.8673	19.5605	19.7515	19.1078	19.2175	20.1843	19.1781	20.7346	20.0162	19.9026	20.034	100	19.7533	0.781511	0.107065	0.923778	-0.114382
GSN	Gelsolin;	20.6937	22.4117	23.0442	22.9338	23.2486	22.71	22.7516	23.0263	100	22.6025	23.9799	23.7745	23.4656	24.1815	23.3062	23.8252	23.8767	24.3361	23.5147	23.7802	23.3608	23.4574	22.5448	100	23.6464	0.000864254	3.06336	0.514253	-0.959449
GSTO1	Glutathione S-transferase omega-1		17.9308	17.5065	18.2431	18.8076		16.7233	17.5569	75	17.7947	17.3934	17.4684	18.7454		18.3277	18.1142	19.4778	17.9711	17.602	18.2102	19.3031	17.172	17.9879	92.3077	18.1478	0.453695	0.343236	0.762715	-0.390784
GSTP1	Glutathione S-transferase P		19.2111	19.6872	18.9757	18.1328	16.4077	19.1805	18.2011	87.5	18.5423	16.6358	19.0045	18.0111	17.091	19.0071	17.7286	21.7635	17.036	17.5534	18.05	17.482	16.1696	17.8926	100	17.9558	0.088433	1.05339	0.934194	-0.0982063
HABP2	Hyaluro -binding protein 2			19.6734	21.5835	20.062		20.516	20.8088	62.5	20.5287	20.3018	20.0051		19.9513	21.9325	21.1069			20.3912	20.7805	20.1619	21.0107	20.7806	76.9231	20.6423	0.806496	0.0933978	0.940486	-0.0885216
HBA1	Hemoglobin subunit alpha	25.4912	26.7882	25.8198	25.9406	27.4744	25.6743	24.4394	24.2989	100	25.7409	24.7651	23.7986	27.9291	22.5978	25.9791	27.369	26.6115	23.6888	25.3063	19.8998	25.1002	22.7655	23.7347	100	24.5804	0.168824	0.772566	1.21882	0.28549
HBB	Hemoglobin subunit beta	26.7193	26.8903	26.9342	26.3841	28.2716	26.1011	25.232	26.1529	100	26.5857	25.7866	25.0389	28.6076	23.187	26.4292	28.6555	27.3235	25.0779	26.3616	21.2249	26.2404	24.079	25.1659	100	25.6291	0.192379	0.715841	1.07607	0.105776
HBD	Hemoglobin subunit delta	22.5304	22.9268	22.7249	21.357	24.1773	21.762	20.7781	20.9365	100	22.1491	21.2376	20.33	24.8879	17.8694	21.2601	24.7545	22.8178	19.188	21.0645		21.0882	18.9747	19.7736	92.3077	21.1039	0.164915	0.78274	0.940512	-0.0884823
HBG2;HBG1	Hemoglobin subunit gamma-2;Hemoglobin subunit gamma-1		20.6045		20.0254	19.8265	19.5015	18.5698		62.5	19.7056	20.2303		21.24		20.0633	19.8722	20.5137				19.314			46.1538	20.2056	0.273322	0.563326	0.716373	-0.481218
HGFAC	Hepatocyte growth factor activator;	20.5266	16.5221	18.8664	17.0154	18.8207	17.8986	17.1575	18.4137	100	18.1526	19.143	18.7487	19.8106	19.1304	17.5558	19.4494	18.8634	18.2074	18.1863	18.1826	18.2371	18.1601	17.6465	100	18.5632	0.346465	0.460341	0.9911	-0.0128976
HIST1H2BL;HIST1H2BM;HIST1H2BN;HIST1H2BH;HIST2H2BF;HIST1H2BC;HIST1H2BD;H2BFS;HIST1H2BK;HIST3H2BB;HIST2H2BE;HIST1H2BB;HIST1H2BO;HIST1H2BJ	Histone H2B type 1-L;Histone H2B type 1-M;Histone H2B type 1-N;Histone H2B type 1-H;Histone H2B type 2-F;Histone H2B type 1-C/E/F/G/I;Histone H2B type 1-D;Histone H2B type F-S;Histone H2B type 1-K;Histone H2B type 3-B;Histone H2B type 2-E;Histone H2B type	20.1322			21.2273	18.987	22.5432	22.6693	20.5607	75	21.0199		17.7882		17.2527	21.0419						19.9876		17.9127	38.4615	18.7966	0.0446097	1.35057	4.01715	2.00617
HIST1H4A	Histone H4		17.3053	18.5955	21.7822	20.8493	22.0735	22.5394	20.4764	87.5	20.5174	18.457	18.3785		18.6729	21.3244			17.9224		18.5677	20.1989		18.1802	61.5385	18.9627	0.0825793	1.08313	3.5016	1.80801
HP	Haptoglobin	27.3733	27.3903	26.8022	25.1027	26.02	23.7071	27.1036	27.6272	100	26.3908	25.3001	26.3134	27.1809	22.4904	25.4914	26.9495	24.5854	25.3135	25.9666	24.6924	23.7629	26.2546	25.8256	100	25.3944	0.0821938	1.08516	1.96821	0.976887
HPR	Haptoglobin-related protein	21.0028	19.828	21.444	19.6584	21.242	20.9312	21.3585	20.7622	100	20.7784	20.2212	20.5081	20.7412	21.3841	20.306	20.9985	21.3438	21.495	19.719	20.8237	21.7872	21.5947	21.8361	100	20.9814	0.514539	0.288582	0.863744	-0.211324
HPX	Hemopexin	24.1974	25.6762	24.1358	23.6672	25.2784	24.2209	25.1084	25.3091	100	24.6992	25.8382	25.2656	25.3888	25.8454	24.2814	24.8615	24.5125	25.8442	25.1858	25.936	23.7239	25.2938	24.9381	100	25.1473	0.147501	0.831204	0.74511	-0.424476
HRG	Histidine-rich glycoprotein	22.4627	22.3317	22.0191	21.7652	22.7985	22.9342	21.9328	22.4175	100	22.3327	22.778	22.3375	23.0475	23.8209	22.0037	22.9162	21.6456	22.4784	22.4543	23.6656	22.8751	23.0413	22.6455	100	22.7469	0.095778	1.01873	0.717568	-0.478813
HSP90AA1	Heat shock protein HSP 90-alpha		18.6337	19.3663	19.47	19.1998	16.9018	18.4634	18.2675	87.5	18.6147	18.2789	19.3511	18.1702	17.05	19.1312	18.6835	21.4728	17.8123	18.2474	18.974	19.3926	17.1302	19.2324	100	18.6867	0.781511	0.107065	0.761736	-0.392636
HSP90AB1	Heat shock protein HSP 90-beta		18.54	19.4415	18.7842	18.0752		17.4982	16.3905	75	18.1216	16.9788	18.6486	17.1902		18.0194	17.5024	20.9169	15.9679	17.0021	17.5977	18.7932	15.8124	18.373	92.3077	17.7335	0.399269	0.398734	0.958269	-0.0614967
HSP90B1	Endoplasmin		16.9031	18.3036	18.3756	16.4728	15.7062	15.3208		75	16.847	16.2573	16.9791	15.4139	15.7435	18.0619	16.9996	20.1942		15.3638	16.4064	17.4379		17.5322	84.6154	16.9445	0.919944	0.0362384	0.74015	-0.434111
HSPA1A;HSPA1B;HSPA1L	Heat shock 70 kDa protein 1A;Heat shock 70 kDa protein 1B;Heat shock 70 kDa protein 1-like		17.5507	17.7405	18.3213	18.0644	16.3486	18.4114	18.3618	87.5	17.8284	16.384	17.8656	18.1553	16.2262	17.9558	17.7442	20.1154	16.2969	16.7663	17.9448	17.4389		17.6291	92.3077	17.5435	0.236724	0.625758	0.976615	-0.0341378
HSPA5	Endoplasmic reticulum chaperone BiP			18.2093	18.9071	17.2231	15.8574	16.631	15.8819	75	17.1183	16.8153	18.0113	16.5655		18.2136	17.4494	20.5083				16.1037		15.9948	61.5385	17.4577	0.605577	0.217831	0.602524	-0.730909
HSPA8	Heat shock cognate 71 kDa protein		18.8098	19.5639	19.148	18.8447	18.3032	18.166	18.5085	87.5	18.7635	17.9334	19.0634	18.6348	16.9488	19.1026	18.3699	21.552	17.9196	18.1487	18.5038	18.1666		18.6608	92.3077	18.5837	0.236724	0.625758	0.810932	-0.302346
HSPG2	Basement membrane-specific heparan sulfate proteoglycan core protein			17.8526	19.0593	16.6186	17.5542	16.9324	17.0325	75	17.5083	18.2032	18.1057		17.631	18.6938	18.1087	17.5628	15.7034	19.12	17.5378	16.564	17.955	19.1559	92.3077	17.8618	0.261054	0.583269	0.777261	-0.36353
HTRA1	Serine protease HTRA1			18.4027	20.8198		17.6517		18.707	50	18.8953	19.1178	18.5893	18.3435	19.9137	20.0461	19.7655	18.2906	20.1314	21.1827	21.2891	18.8374	21.247	19.2553	100	19.693	0.212946	0.67173	0.645635	-0.63121
IGFALS	Insulin-like growth factor-binding protein complex acid labile subunit	16.322	18.9614	18.7177	20.4093	19.6812	19.104	18.9587	19.2762	100	18.9288	19.1605	18.8631	19.9166	19.7228	19.9433	20.0018	19.4729	19.7042	18.9692	19.5763	19.1733	19.4944	19.0882	100	19.4682	0.128301	0.891769	0.828303	-0.27177
IGHA1	Immunoglobulin heavy constant alpha 1	27.012	25.6391	26.6387	25.7096	26.5455	26.9476	25.0011	27.1024	100	26.3245	27.293	27.2538	26.4504	26.2223	26.1282	26.7424	25.6882	25.3675	26.992	26.061	26.0249	25.6493	25.7259	100	26.2768	0.884836	0.0531372	1.05589	0.0784581
IGHD	Immunoglobulin heavy constant delta			19.7773	19.1281	20.416	22.806	17.7691	20.6504	75	20.0912	24.0125	20.7772	21.0074	18.9581	18.7373		19.6609	17.5337	20.8864	19.8947		19.1029		76.9231	20.0571	0.913627	0.0392312	0.765991	-0.384601
IGHG1	Immunoglobulin heavy constant gamma 1	27.1444	27.2859	27.9329	26.9833	28.1725	27.9285	27.6762	27.7285	100	27.6065	28.5623	28.0469	27.6744	28.1691	27.1285	28.1756	27.4554	28.2243	27.6477	27.6808	27.755	27.8636	27.2852	100	27.8207	0.384821	0.414741	0.86194	-0.214341
IGHG2	Immunoglobulin heavy constant gamma 2	25.2957	26.2911	27.1099	25.8694	27.098	26.6562	26.2588	27.4818	100	26.5076	27.6447	27.5333	26.8387	27.4789	26.1241	27.4987	26.797	27.0756	27.412	27.1206	27.111	26.5769	26.5369	100	27.0576	0.0702156	1.15357	0.724465	-0.465011
IGHG3	Immunoglobulin heavy constant gamma 3	20.9548	24.5366	23.7484	23.7364	24.866	24.6499	22.9047	24.3559	100	23.7191	26.0132	24.5529	23.7357	25.0641	24.4104	24.9432	23.8623	25.812	25.7271	25.1063	23.6063	23.8712	23.8342	100	24.6568	0.095778	1.01873	0.56462	-0.824648
IGHG4	Immunoglobulin heavy constant gamma 4	23.9378	23.7606	25.5597	22.7918	25.4291	26.8508	25.5078	25.391	100	24.9036	27.1927	25.5976	24.3837	26.4106	23.5992	23.1402	23.7556	26.1692	25.4693	25.2214	25.5146	24.6082	25.0325	100	25.0842	0.828004	0.0819675	0.903663	-0.146143
IGHM	Immunoglobulin heavy constant mu	23.5358	25.2004	25.9958	23.8003	24.6166	25.233	25.9746	24.5927	100	24.8686	24.6915	24.6601	24.7358	25.5287	23.7773	24.3348	23.9004	24.4	23.6938	24.7162	25.9389	25.0796	25.3869	100	24.6803	0.663908	0.177892	1.20862	0.273355
IGHV3-15	Immunoglobulin heavy variable 3-15	23.3688		23.535	22.1702	23.151		23.671		62.5	23.1792	23.4378	24.3643	23.8595	23.7295	22.1936	23.5506	23.7333	23.5161		23.458	23.0212	23.0059	22.6341	92.3077	23.3753	0.460597	0.336679	0.863088	-0.212421
IGHV3-49	Immunoglobulin heavy variable 3-49	18.1228	17.9495	20.3236	18.8931	18.4146	18.2635	19.9386	20.4175	100	19.0404	19.1058	20.6155	18.3753	18.9851	18.3729	19.9031	18.7251	19.5281	19.8524	20.9909	20.7848	20.521	20.3262	100	19.6989	0.111103	0.954274	0.665888	-0.586648
IGHV3-74;IGHV3-66;IGHV3OR16-13	Immunoglobulin heavy variable 3-74;Immunoglobulin heavy variable 3-66;Immunoglobulin heavy variable 3/OR16-13 (non-functional) (Fragment);Immunoglobulin heavy variable 3-53	21.7679	23.7317	24.1636	22.6466	23.4261		23.2379		75	23.1623	23.9778	22.8505		23.026	22.8424			23.6306	23.8056			23.7645		53.8462	23.4139	0.567709	0.245874	0.910393	-0.135438
IGHV5-51	Immunoglobulin heavy variable 5-51	21.3841	22.1719	23.2097	21.0482	21.9634	21.5751	21.1849	19.165	100	21.4628	22.2753	23.0843	22.2887	22.6524	21.0574	21.5581	22.4734	21.9448	21.2033	21.7444	21.8224	21.2938	21.5827	100	21.9216	0.277342	0.556985	0.854016	-0.227665
IGHV6-1	Immunoglobulin heavy variable 6-1	21.1458	20.5221	21.708	21.5429	21.9654		23.3195	23.6003	87.5	21.972	22.2446	22.084	21.9444	22.5669	20.6851	23.3691	21.7933	22.5242	22.5143	22.6803	22.774		23.1245	92.3077	22.3587	0.271899	0.565593	0.909084	-0.137515
IGKC	Immunoglobulin kappa constant	28.5801	26.7895	27.1594	26.2513	27.2386	27.4176	26.8375	26.5646	100	27.1048	27.5135	27.5313	27.3938	27.617	26.3384	27.3625	26.8445	27.6975	26.8497	26.8235	26.7695	26.6694	26.4077	100	27.0629	0.717275	0.144314	1.10747	0.147268
IGKV1-5	Immunoglobulin kappa variable 1-5		22.1775	23.7356	22.5075	23.4854		23.301	23.4798	75	23.1145	23.2275	23.7662	23.7105	24.0115	22.4991	23.5505	22.4822	23.1702	23.0993	22.9123	23.1392	23.0598	22.4553	100	23.1603	0.860756	0.0651198	0.982864	-0.0249359
IGKV1-8;IGKV1-9	Immunoglobulin kappa variable 1-8;Immunoglobulin kappa variable 1-9	22.1795	20.133	21.4358	20.1316	20.6273	21.0248	20.4685	20.7274	100	20.841	21.0627	21.7988	21.5954	22.338	20.3455	21.0351	20.3982	22.4177	20.6853	21.4044	21.3831	21.3253	20.6815	100	21.267	0.147501	0.831204	0.753608	-0.408113
IGKV2-24;IGKV2D-24	Immunoglobulin kappa variable 2-24;Probable non-functional immunoglobulin kappa variable 2D-24		22.533	23.9169		21.7644			23.5254	50	22.9349	22.633	23.566	23.1182	22.5595	18.7725	24.0137	22.1048	23.7772		23.8248	23.7741		23.2631	84.6154	22.8552	0.695299	0.157829	0.940691	-0.0882066
IGKV2D-29	Immunoglobulin kappa variable 2D-29	24.8586	24.2421	24.9579	24.2227	24.3547	24.3803	23.4737	24.539	100	24.3786	25.1115	25.8313	25.2142	26.4606	24.1109	24.7678	24.5831	25.3314	25.6065	24.8881	24.6766	24.449	23.8975	100	24.9945	0.0425828	1.37077	0.604271	-0.726731
IGKV3D-11	Immunoglobulin kappa variable 3D-11;Immunoglobulin kappa variable 3-11			25.591	23.6758	24.2494	23.6644	24.3663	25.1037	75	24.4417	24.8476	25.1434	24.9053	24.8492	23.7925	24.7766	24.1071	24.9081	24.1547	24.8644	24.6529	25.0444	23.8883	100	24.6103	0.598725	0.222773	0.965696	-0.0503585
IGKV4-1	Immunoglobulin kappa variable 4-1	20.5743	23.217	23.5464	22.5935	23.5947	22.7161	23.1308	24.5029	100	22.9845	23.321	24.4293	23.7261	23.8935	22.6506	23.9669	23.3594	23.9516	23.6585	23.926	23.9184	23.4091	23.3354	100	23.6574	0.0597088	1.22396	0.747061	-0.420701
IGLL5;IGLC1	Immunoglobulin lambda-like polypeptide 5;Immunoglobulin lambda constant 1	26.42	25.8514	26.0586	25.0402	26.0547	25.0427	25.578	26.4815	100	25.8159	26.5111	25.6983	25.6813	25.828	25.3989	25.1025	24.978	25.9043	26.0636	25.9905	25.8496	25.5907	25.2754	100	25.6825	0.514539	0.288582	1.12228	0.166434
IGLV3-9	Immunoglobulin lambda variable 3-9				19.9033	20.4006			20.5719	37.5	20.2919	20.8066		21.4239		20.0063		20.5228		19.4293		19.9476	20.0284	19.8106	61.5385	20.2469	0.838256	0.0766231	0.958694	-0.0608571
IGLV7-46	Immunoglobulin lambda variable 7-46;Immunoglobulin lambda variable 7-43			20.4167	19.9535	20.6705		20.1174		50	20.2895	23.1648	21.7106	20.7496	21.3047	20.0807	22.828	21.193	22.2486		22.2224				69.2308	21.7225	0.0206376	1.68534	0.309017	-1.69424
IQGAP1	Ras GTPase-activating-like protein IQGAP1			16.3243	16.471			16.1815		37.5	16.3256		16.58	14.6798		16.5976	14.0722	19.6449			15.7344	15.2408		14.5232	61.5385	15.8841	0.540291	0.267372	0.560008	-0.836482
ITGAM	Integrin alpha-M				15.8689	16.2059	16.6915	17.9328	15.9428	62.5	16.5284										18.2977	16.7213			15.3846	17.5095	0.121335	0.916013	0.515462	-0.956061
ITIH1	Inter-alpha-trypsin inhibitor heavy chain H1	21.8362	22.5882	22.885	22.9415	23.3041	22.6824	22.6971	22.9446	100	22.7349	23.5465	22.952	23.5404	23.8917	22.9078	22.9068	22.0678	23.0444	22.7969	23.1041	23.7133	23.077	22.7248	100	23.098	0.0505408	1.29636	0.765342	-0.385824
ITIH2	Inter-alpha-trypsin inhibitor heavy chain H2	22.302	23.1469	23.8877	24.574	24.2303	23.8154	23.4684	23.8975	100	23.6653	24.1254	23.8094	24.0142	24.1471	24.633	23.3827	23.0263	23.8104	23.8685	23.8912	24.3427	24.2818	23.9264	100	23.943	0.384821	0.414741	0.872503	-0.196768
ITIH3	Inter-alpha-trypsin inhibitor heavy chain H3	20.2513	21.7887	22.4996	20.5774	20.8977	21.2355	20.5893	21.0317	100	21.1089	20.7762	21.8586	21.0226	21.4556	20.4874	20.8583	19.1074	20.0601	20.0531	21.1355	21.4538	21.4482	21.258	100	20.8442	0.717275	0.144314	1.22231	0.28961
ITIH4	Inter-alpha-trypsin inhibitor heavy chain H4	22.8278	24.0383	23.932	22.6613	23.7358	24.1719	23.6772	24.0665	100	23.6389	23.7676	23.8024	23.9425	23.5141	22.8278	23.8961	22.7805	23.4442	23.2856	22.9061	23.4076	23.7924	23.6967	100	23.4664	0.246566	0.608067	1.15779	0.211369
KLKB1	Plasma kallikrein	21.6652	19.7009	19.8563	19.8413	20.5009	20.5343	20.168	20.8329	100	20.3875	20.3876	20.2467	20.7407	20.7146	20.0083	20.8317	19.8605	20.5256	20.6055	20.263	20.5376	20.3636	20.3365	100	20.4171	0.514539	0.288582	0.974055	-0.037925
KNG1	Kininogen-1	26.0406	24.529	23.8263	24.1264	24.1888	24.2718	23.9186	24.0343	100	24.367	25.0978	24.2611	24.3043	24.8032	23.7947	24.598	23.5875	24.6376	24.6484	24.7713	24.2618	24.3828	24.1386	100	24.4067	0.514539	0.288582	1.06298	0.0881088
KRT1	Keratin, type II cytoskeletal 1;	23.9284	21.2249	21.0548	19.2498	22.067	21.2479	19.4825	20.5685	100	21.103	20.8147	20.0395	22.675	24.4571	19.9204	18.7621	20.0589	21.2258	19.6964	20.5648	21.0675	22.7174	21.4012	100	21.0308	0.942267	0.025826	0.911716	-0.133343
KRT10	Keratin, type I cytoskeletal 10;	22.968	20.1733	19.9704	18.3119	20.8372	20.5055	19.1502	19.5884	100	20.1881	20.4595	18.2277	22.1886	24.2389	18.8393	17.7078	18.4837	20.7498	19.383	18.8731	20.3315	21.6454	21.8811	100	20.2315	0.246566	0.608067	1.07684	0.106809
KRT2	;Keratin, type II cytoskeletal 2 epidermal;	21.1565	18.9542	17.2802	15.1124	20.2568	19.0356	15.8798	16.5344	100	18.0262	17.5394	14.6813	20.9445	22.3754	15.6582	16.0612	15.4838	19.0488	15.9539	16.1248	17.6256	19.0879	20.6629	100	17.7883	0.884836	0.0531372	0.951559	-0.0716354
KRT9	;Keratin, type I cytoskeletal 9	22.1036		18.1094	15.5287	20.0137	18.731		17.6416	75	18.688	16.5703	16.9532		17.4494	15.9583	14.7436	15.3445	18.2395	15.5106	18.5477	18.8949	20.7125	17.4005	92.3077	17.1937	0.884836	0.0531372	0.648542	-0.624728
LBP	Lipopolysaccharide-binding protein	17.8722	21.6145	21.3283	21.243	19.646	20.1378	21.1519	20.4141	100	20.426	20.2605	19.7244	20.0427	19.9024	21.1183	19.6387	18.0679	19.9362	20.0608	19.475	19.6542	20.8235	20.1207	100	19.9096	0.884836	0.0531372	0.740623	-0.433189
LCN2	Neutrophil gelatinase-associated lipocalin	20.1215	18.5139	17.7737	16.1126	19.8717	18.9029	20.5534	20.1523	100	19.0002		16.9055				17.0049					18.3935		17.5276	30.7692	17.4579	0.133994	0.872916	3.57689	1.83871
LCP1	Plastin-2		18.9406	19.2924	17.5923	18.7588	19.914	20.447	19.856	87.5	19.2573	19.0729	19.1514	18.2575	18.7804	17.8387	16.9448	19.8646	18.8281	18.3055	20.1552	20.7092	17.7538	19.5083	100	18.8593	0.0821938	1.08516	1.63308	0.707592
LDHA	L-lactate dehydrogenase A chain	20.8606	19.5967	20.1153	19.2291	19.973	19.7916	20.8935	20.5742	100	20.1292	19.2503	20.1451	20.776	18.388	19.4713	19.9953	22.3918	19.0768	20.0527	20.5063	21.9014	19.4671	20.9394	100	20.1817	0.0617262	1.20953	3.78604	1.92069
LDHB	L-lactate dehydrogenase B chain		18.6922	18.4155	16.9377	18.9129	17.8956	17.9958	18.3052	87.5	18.165	16.9516	17.7192	20.0136	16.7932	16.8959	18.1555	20.4416	16.4442	17.5025	17.1505	19.7869	17.4882	19.007	100	18.0269	0.451566	0.345279	1.21891	0.285589
LGALS3BP	Galectin-3-binding protein	21.7509	19.7476	19.2054	17.5461	18.249	18.6172	18.5812	18.996	100	19.0867	18.115	18.8029	18.3548	19.0726	17.8564	19.0447	17.8767	17.6793	18.7049	19.3766	18.7822	18.8271	19.0849	100	18.5829	0.942267	0.025826	0.766259	-0.384097
LPA	Apolipoprotein(a)	19.1957	17.6849	15.6328	17.5157	17.7801	21.0119	20.3023	17.7858	100	18.3637	19.6814	17.566	16.7439		17.4548			20.6963		19.5839	20.8995	20.1716	21.7127	69.2308	19.39	0.451566	0.345279	0.765645	-0.385253
LRG1	Leucine-rich alpha-2-glycoprotein	24.2864	20.4215	20.546	18.3909	17.8127	21.1644	19.8883	20.2841	100	20.3493	18.1824	19.3655	19.0742	18.8444	17.7099	19.6616	16.1827	17.5651	17.0018	18.6389	17.0489	18.953	19.2633	100	18.2686	0.00737178	2.13243	9.06837	3.18084
LTA4H	Leukotriene A-4 hydrolase		16.5987	17.202		17.6674	16.6738	18.4564	18.0779	75	17.446	17.4937	17.5494	16.7961	16.5357	15.3032		19.3532	17.906	17.3974	20.3188	19.1146		16.1483	84.6154	17.6288	1	0	0.600364	-0.73609
LTF	Lactotransferrin		18.3142	18.1885	19.4284	21.2782	21.3568	22.9665	21.8265	87.5	20.4799		18.6835	15.913	15.5782	18.8744		15.8061				20.1046		19.6027	53.8462	17.7947	0.0639193	1.19437	6.17225	2.6258
LUM	Lumican	25.2588	20.2879	19.9375	21.5174	20.4465	19.9001	20.1561	19.9124	100	20.9271	21.0762	20.2228	20.9164	21.6682	21.37	20.8876	22.8773	20.5189	20.5507	20.7644	20.3695	20.2497	20.1076	100	20.8907	0.147501	0.831204	2.73989	1.45412
LYZ	Lysozyme C				18.8608	19.8534		21.1149	20.1976	50	20.0067			18.8525	19.2878	19.351		18.463	19.8468	19.5806	21.6724	20.2914	19.4574	19.6188	76.9231	19.6422	0.322199	0.491876	1.22164	0.288817
MDH1	Malate dehydrogenase, cytoplasmic		19.3043	19.001		18.6083				37.5	18.9712	17.7724	18.4441	20.8985			18.9615	21.226		17.6133	16.6971	19.1711		18.1811	69.2308	18.7739	0.405381	0.392137	0.704491	-0.505347
MMP2	72 kDa type IV collagenase			17.0231	19.958	16.2841	17.2492		16.5176	62.5	17.4064	19.2759	17.4397	15.1232	18.9686	19.4163	17.3721	17.9319	17.2005	19.156	19.0867	17.2424	17.5264	17.1704	100	17.9162	0.217889	0.661764	0.903205	-0.146874
MMP3	Stromelysin-1	19.1699		17.8487		16.5101	18.9908	18.2059	21.6893	75	18.7358	21.0478	22.4505	17.837	21.1942	16.9635		16.9935	16.9229	20.271			16.3986		69.2308	18.8977	0.813664	0.0895551	0.626561	-0.674473
MMP9	Matrix metalloproteinase-9				16.7103	17.3216	17.8566	18.4426	18.5028	62.5	17.7668					16.8591				16.4716	16.8042	19.3185	16.4319	17.1732	46.1538	17.1764	0.201243	0.69628	1.22165	0.288825
MPO	Myeloperoxidase	18.8137	17.1394	17.2722	19.127	19.7296	20.5092	21.6833	20.4184	100	19.3366		18.44		14.2132	18.587		15.0432				19.3168		18.1428	46.1538	17.2905	0.0707011	1.15057	3.6398	1.86386
MSN	Moesin		19.2952	19.3165	20.377	19.4774	18.7499	19.7603	18.9163	87.5	19.4132	18.9827	19.6063	18.1821	17.8687	20.0276	17.9852	21.1021	18.5581	18.8949	19.716	20.156	17.6629	19.2841	100	19.079	0.362141	0.441122	1.05419	0.0761334
MXRA5	Matrix-remodeling-associated protein 5			16.0911	17.2714		16.9704	17.44	16.4935	62.5	16.8533		17.4246		15.8807	17.9579	16.6286	16.4381		17.5296	16.3126	16.3939	17.8761	19.9112	76.9231	17.2353	0.624206	0.204672	0.553394	-0.853622
MYH9	Myosin-9		18.8048	19.542	19.8709	19.9109	19.4236	19.6858	17.7148	87.5	19.279	16.9159	19.1724	18.0863	15.6263	19.9509	17.2343	21.6423	15.1566	17.5178	18.1765	18.3474	15.0814	19.4177	100	17.8712	0.0522036	1.2823	1.29377	0.371576
MYL12A;MYL12B;MYL9	Myosin regulatory light chain 12A;Myosin regulatory light chain 12B;Myosin regulatory light polypeptide 9	20.2454		17.9409	17.6793	18.4106	17.5463	17.6	18.3595	87.5	18.2546	17.4209		17.6508		17.9425	17.6399	19.807						17.4543	46.1538	17.9859	0.317311	0.498516	1.23165	0.300589
NME1	Nucleoside diphosphate kinase A			19.1104	19.5002	18.5512			18.7137	50	18.9689		18.8249	19.1099		19.6001	19.0166	20.6211		18.8135		18.9944		18.6386	61.5385	19.2024	0.610385	0.214396	0.791764	-0.336858
OGN	Mimecan	15.839		14.7092	18.1103	16.4343				50	16.2732	13.225		16.7886	16.6478	18.1428	16.7217	21.6411	15.6472		16.1197				61.5385	16.8667	0.496906	0.303726	0.227553	-2.13572
OMD	Osteomodulin	19.7107		15.4279	19.8114					37.5	18.3167				15.9861	19.5369	15.8498	17.586	15.0229	16.7043	16.3357		16.7533		61.5385	16.7219	0.307434	0.512248	3.43496	1.78029
ORM1	Alpha-1-acid glycoprotein 1	28.3414	23.6712	22.8519	21.4275	22.2416	24.2475	22.7429	23.0674	100	23.5739	24.2466	22.1133	22.9913	22.8074	21.7387	22.998	22.005	22.7943	22.5348	22.1232	22.3842	22.8877	22.5498	100	22.6288	0.192379	0.715841	7.03096	2.81372
ORM2	Alpha-1-acid glycoprotein 2	26.5223	20.9694	20.632	19.5919	20.0451	21.9621	21.1497	21.8008	100	21.5842	20.1926	20.6661	21.1057	20.907	20.1149	21.0181	20.0913	20.3752	20.7606	19.9655	20.7067	21.02	21.22	100	20.6264	0.310635	0.507749	8.3098	3.05481
P4HB	Protein disulfide-isomerase		17.248	18.324	18.6989	17.8995	17.7695	17.4828	17.0902	87.5	17.7876		17.9391	17.0082	15.2292	18.2822	17.2521	20.5386		17.3485	16.4665	17.9291		18.2244	76.9231	17.6218	0.69627	0.157222	0.751224	-0.412685
PCOLCE	Procollagen C-endopeptidase enhancer 1			20.689	20.5965	18.9427	19.2908	18.8021	19.1085	75	19.5716	21.0585	20.2804	18.5597	20.9792	20.7729	19.9665	20.1155	20.1737	20.7897	19.9655	19.2301	19.4754	20.666	100	20.1564	0.135962	0.866583	0.698311	-0.518058
PDIA3	Protein disulfide-isomerase A3			17.9662	17.9723	17.4718	16.2254	16.9271		62.5	17.3126		18.0348	15.739		18.2687	17.6434	20.8061			16.8084	18.2593		17.9381	61.5385	17.9372	0.305507	0.514979	0.427182	-1.22708
PFN1	Profilin-1	19.9823	20.7418	20.9323	20.4456	20.7582	20.4875	21.5489	20.1229	100	20.6274	19.1123	20.3952	20.0263	18.8007	20.102	19.8408	22.2617	19.3924	19.5567	20.312	19.7947		19.814	92.3077	19.9507	0.00871191	2.05989	1.35316	0.436328
PGAM1	Phosphoglycerate mutase 1		20.9338	20.9778	18.6291	19.8516		20.0339	19.7202	75	20.0244	18.6645	19.7753	22.6316	18.5377	19.6472	19.5079	23.0139		19.4302	19.6365	21.6981		19.3528	84.6154	20.1723	0.481728	0.317198	0.566196	-0.820626
PGD	6-phosphogluconate dehydrogenase, decarboxylating		19.2361	18.7482	18.7231	19.96	19.4184	20.9481	19.2712	87.5	19.4721	17.3103	18.6524	17.3778	15.8299	18.5299	17.1819	20.1823	16.715	17.187	18.2916	19.0421	15.4378	18.0732	100	17.6778	0.00296244	2.52835	2.75298	1.46099
PGK1	Phosphoglycerate kinase 1		19.456	19.5303	19.4338	19.8136	18.8682	19.6852	18.6204	87.5	19.3439	18.1962	19.4488	20.0605	17.2114	19.1125	19.3184	21.412	18.3157	18.6333	19.5052	19.8566	17.6282	19.3846	100	19.0833	0.405381	0.392137	0.935898	-0.0955769
PGLYRP2	N-acetylmuramoyl-L-alanine amidase	23.9971	19.4755	20.5236	20.6652	20.9917	20.889	21.6886	21.4669	100	21.2122	21.7213	21.5443	21.543	21.8502	20.5829	20.8061	20.9678	21.7139	21.8568	21.4047	21.4472	21.3871	21.4552	100	21.4062	0.218266	0.661014	1.34834	0.43118
PKM	Pyruvate kinase PKM		20.5191	20.7768	21.1968	20.9069	19.0297	20.53	20.1727	87.5	20.4474	20.1874	21.1103	21.3459	19.3727	21.3209	19.9177	22.7975	19.883	20.0567	20.8656	20.171	19.1608	20.2426	100	20.4948	0.781511	0.107065	0.820315	-0.28575
PLG	Plasminogen	20.5704	23.972	23.2628	24.0034	24.7057	22.8199	22.8915	23.4096	100	23.2044	23.7646	23.3721	23.0599	23.3693	23.6765	23.6472	22.8779	23.9958	24.052	23.6739	22.7255	24.0641	23.7117	100	23.5377	0.612194	0.213111	0.972922	-0.0396037
PLTP	Phospholipid transfer protein	21.1838	17.4871	19.6267	19.0892	18.2808	19.7281	19.561	19.4773	100	19.3043	20.2679	19.8988	18.5874	21.0423	19.4735	18.8237	19.7489	20.5769	19.735	20.7028	20.3458	18.462	20.6399	100	19.8696	0.147501	0.831204	0.750691	-0.41371
PNP	Purine nucleoside phosphorylase		17.9152	16.9309	16.5209	18.5535	17.4308	17.7695	16.257	87.5	17.3397		16.4044	18.9545			18.4228	19.3331				17.319		17.1277	46.1538	17.9269	0.391366	0.407417	0.595509	-0.747804
PON1	Serum paraoxonase/arylesterase 1	21.0757	22.0085	22.2025	22.3665	22.104	21.88	21.6141	22.0896	100	21.9176	21.8381	22.4024	22.9314	22.1157	22.3714	22.2042	22.231	22.4545	22.1127	21.2395	22.9429	22.0731	22.2792	100	22.2459	0.0425828	1.37077	0.789165	-0.341601
POSTN	Periostin;	15.1681	19.8161	22.2233	21.7184	21.0686	21.5084	21.3743	19.78	100	20.3321	22.0122	21.9731	18.4742	22.0332	21.9204	21.7118	22.2801	17.7226	22.6397	20.4678	20.5316	21.7756	22.8486	100	21.2608	0.128301	0.891769	0.634709	-0.655834
PPIA	Peptidyl-prolyl cis-trans isomerase A		19.7282	20.6585	19.855	20.1513	17.6984	18.5853	19.1365	87.5	19.4019	18.5482	20.2419	20.0242	18.1495	19.6221	20.2041	22.7421	18.4355	19.4467	19.5921	19.1029	17.6951	19.5982	100	19.4925	0.721397	0.141826	0.699926	-0.514725
PPIB	Peptidyl-prolyl cis-trans isomerase B		17.0128	18.0954	20.1252	17.9279	16.3991	16.4394	15.9199	87.5	17.4171		17.5529			19.4276	16.9178	19.4973	16.7228	17.291		17.0259		17.5875	61.5385	17.7528	0.487453	0.312067	0.989031	-0.0159121
PRDX1	Peroxiredoxin-1		16.4731	18.8891	18.0653	18.1613	18.1951			62.5	17.9568	17.9344	18.4436	21.0109	17.5693	17.3299	18.6724	22.5722	17.4467	17.7104	19.0975	19.7909		17.8929	92.3077	18.7892	0.67329	0.171798	0.292763	-1.7722
PRDX2	Peroxiredoxin-2	17.297	21.7274	22.1083	20.4172	22.8523	21.0906	20.6906	20.4478	100	20.8289	20.0352	19.7673	23.9122	17.11	20.0526	23.6795	23.1905	19.7304	20.8442	17.2585	21.7754	18.43	19.5836	100	20.413	0.384821	0.414741	0.736161	-0.441908
PRDX6	Peroxiredoxin-6		17.9952	18.0712	18.1127	18.4066	16.8636	16.2719		75	17.6202	16.3372	16.8698	18.724		16.2397	17.7009	18.8221		17.4572					53.8462	17.4501	0.775097	0.110644	1.01546	0.0221364
PRG4	Proteoglycan 4	21.8899	19.2585	21.2088	23.2835	19.1012	20.3975	19.6048	20.8964	100	20.7051	23.2204	22.1378	22.2769	23.8373	23.193	22.3487	22.3727	24.0474	22.6595	23.8753	19.4533	21.3119	18.4747	100	22.2468	0.0357113	1.44719	0.362678	-1.46324
PROS1	Vitamin K-dependent protein S	20.123	21.5723	20.7449	22.0216	21.3797	21.5481	20.9288	22.1885	100	21.3134	21.0105	21.0066	21.6534	21.5101	21.7929	21.7584	20.2339	21.2958	21.424	20.7968	21.2069	21.7956	21.5427	100	21.3098	0.942267	0.025826	1.05336	0.0749973
PSMA6	Proteasome subunit alpha type-6			16.151	17.0803	16.8918		16.131	16.0702	62.5	16.4649			15.9023		17.2568	16.467	18.467			16.2569	17.8162		16.4295	53.8462	16.9423	0.291152	0.53588	0.620611	-0.688239
PTGDS	Prostaglandin-H2 D-isomerase	25.0333		17.6994	17.5336			16.9527		50	19.3047	20.8334	19.4116	18.5672	21.5172		20.1102	18.9215	19.6523	19.6798	19.4472	18.8334	16.7693	17.8778	92.3077	19.3018	0.275092	0.560521	9.70147	3.2782
PYGL	Glycogen phosphorylase, liver form			16.8667	16.1608	17.1227		18.6439	17.0228	62.5	17.1634			17.3157				18.6312				17.0515		16.8149	30.7692	17.4533	0.624206	0.204672	0.856528	-0.223428
PZP	Preg cy zone protein	16.8062	21.1725	20.9418	21.5267	19.6299	21.2988	20.1361	22.4592	100	20.4964	22.1067	20.2278	22.2805	21.7292	21.3651	22.1337	16.9723	20.879		21.146	20.1773	22.4292	20.4479	92.3077	20.9912	0.440401	0.356152	0.780378	-0.357756
QSOX1	Sulfhydryl oxidase 1			18.858	19.1528	18.3525	18.8714	19.1181	18.6066	75	18.8265	18.6817	19.0994	18.7778	18.8134	19.0086	19.2015	18.7035	18.4232	18.7807	18.6735	18.3459	18.3863	19.3255	100	18.7862	0.661003	0.179797	1.02532	0.0360754
RBP4	Retinol-binding protein 4	20.5535	21.8261	20.8436	20.3337	21.8466	21.3775	20.668	21.2104	100	21.0824	22.6173	21.5316	19.8199	22.9525	20.2535	21.7366	19.8976	22.6465	21.4159	22.7985	21.6855	21.6877	21.2015	100	21.5573	0.310635	0.507749	0.618452	-0.693267
RNH1	Ribonuclease inhibitor			16.7422	16.7667			16.0891	16.4928	50	16.5227		17.1194	16.718		16.6798	16.9716	19.4014	16.6777	16.2515	18.6078	16.808		16.1358	76.9231	17.1371	0.257899	0.58855	0.492307	-1.02237
S100A8	Protein S100-A8		20.8182	20.4328	17.9069	21.8532	22.4279	22.3513	22.1278	87.5	21.1312		19.0532	17.2235			17.4429					20.837		19.8603	38.4615	18.8834	0.0423571	1.37307	4.41575	2.14266
S100A9	Protein S100-A9	20.2975	20.5275	19.9987		21.3735	23.3968	23.29	21.8684	87.5	21.536		20.2193	17.2299				16.041		17.4912		22.5001		20.1819	46.1538	18.9439	0.0455003	1.34199	3.10554	1.63484
SAA4	Serum amyloid A-4 protein	24.7095		22.8633	21.0311	21.6264	22.2982	22.0005	22.3515	87.5	22.4115	21.0573	21.632	21.4007	21.3507	20.6362	22.4731	20.1234	21.1547	21.785	21.1925	21.4494	21.8717	21.7699	100	21.3767	0.0357344	1.44691	2.68884	1.42698
SELENBP1	Methanethiol oxidase	17.3146	17.8431	18.7718	15.8971	20.3721	15.2678	15.9028	15.6419	100	17.1264	16.704	16.0434	20.7208		14.7371	20.751	21.4692	15.6638	16.4969		17.8751		16.0346	76.9231	17.6496	0.477197	0.321303	0.428338	-1.22318
SEPP1	Selenoprotein P	25.0313	18.5205	17.6325	18.5954	18.8906		18.2853	19.712	87.5	19.5239	18.5376	18.9218	19.1908	18.6891	19.4398	19.1182	18.6956	19.0582	18.7386	19.6975	18.4441	19.0604	19.0546	100	18.9728	0.362141	0.441122	9.96242	3.3165
SERPINA1	Alpha-1-antitrypsin	29.8339	26.4735	26.4403	24.1731	25.4813	26.5101	25.7903	25.8965	100	26.3249	25.7341	26.0445	26.0771	26.2639	24.602	25.8422	25.2884	26.0109	25.292	26.3029	25.5936	25.5457	25.9953	100	25.7379	0.246566	0.608067	3.03867	1.60344
SERPINA10	Protein Z-dependent protease inhibitor	18.1494	20.9699	19.3434	21.7253	19.6403	19.3104	18.1822	19.2214	100	19.5678	19.5658	18.6421	19.6179	19.3679	21.6853	19.1578	19.1333	19.046	20.1603	19.8861	19.6382	20.2259	20.5878	100	19.7473	0.612194	0.213111	1.0657	0.091805
SERPINA3	Alpha-1-antichymotrypsin	25.7054	26.0801	25.572	23.864	24.5347	26.1005	25.2306	25.3221	100	25.3012	25.1784	24.8257	24.9172	25.3949	24.374	25.3555	24.2324	25.1829	24.3143	24.5423	24.5432	24.9454	25.0154	100	24.8324	0.0702156	1.15357	1.48926	0.574594
SERPINA4	Kallistatin		17.2723	18.7409	20.1865	20.4798	20.2355	20.1953	20.2943	87.5	19.6292	21.1229	20.5327	20.9473	20.9898	20.426	20.5188	20.3636	20.4986	20.8957	21.01	20.5424	20.3935	20.0502	100	20.6378	0.00296244	2.52835	0.596779	-0.744732
SERPINA5	Plasma serine protease inhibitor		17.4915	18.3245	19.1896	19.9916	18.8899	19.0875	19.446	87.5	18.9172	19.4621	19.0356	19.0946	19.0178	19.4574	20.2767	18.959	19.3898	19.523	18.9682	18.3702	19.4773	18.3865	100	19.186	0.405381	0.392137	0.883973	-0.177926
SERPINA6	Corticosteroid-binding globulin	23.8898	21.7806	21.4531	20.204	21.3761	21.801	21.362	21.8328	100	21.7124	21.6712	21.8237	21.6853	22.3799	20.59	21.8517	21.1971	22.1887	21.4279	22.114	21.6438	21.3665	21.5481	100	21.6529	0.717275	0.144314	1.30585	0.38499
SERPINA7	Thyroxine-binding globulin	20.7576	20.2521	20.6293	19.512	20.3442	19.9715	20.9766	20.3805	100	20.353	21.1722	20.7613	20.6232	21.1473	19.977	20.5391	19.4943	20.71	21.0003	21.0774	21.3126	21.1432	20.7673	100	20.7481	0.0425828	1.37077	0.75365	-0.408034
SERPINB1	Leukocyte elastase inhibitor		17.3497	17.9504	16.9573	19.809	19.9058	20.8221	20.0305	87.5	18.975	16.8623	18.6195			16.5692	15.6435	17.2757	15.7648	16.7108	16.9474	19.5692		17.856	76.9231	17.1818	0.0111698	1.95195	3.59802	1.8472
SERPINC1	Antithrombin-III	23.8123	24.0455	24.0601	24.0079	24.203	24.1141	23.9859	24.0062	100	24.0294	24.7533	24.0729	23.9742	24.7358	23.8974	24.4134	23.7282	24.2688	24.4536	24.2753	24.2057	24.0545	24.023	100	24.2197	0.128301	0.891769	0.859934	-0.217703
SERPIND1	Heparin cofactor 2	21.1111	22.2228	22.181	21.8424	22.0513	21.6811	22.6556	22.4759	100	22.0276	22.0819	21.9077	22.561	21.7234	21.6736	22.4887	21.6081	21.6884	21.6448	21.6478	22.1596	22.1083	21.9009	100	21.938	0.384821	0.414741	1.08775	0.121347
SERPINF1	Pigment epithelium-derived factor	19.1993	21.523	22.0022	22.9849	20.9511	21.6438	21.6488	22.085	100	21.5048	22.4006	21.8878	21.9525	22.9934	23.0872	21.3558	21.7107	21.7295	22.2972	21.7662	21.6984	21.728	22.1956	100	22.0618	0.111103	0.954274	0.780192	-0.358099
SERPINF2	Alpha-2-antiplasmin	22.1356	21.85	21.7822	21.9231	21.602	22.3133	21.8066	22.1666	100	21.9474	21.9594	21.9616	22.3784	22.143	21.9176	21.9197	21.4076	21.6843	21.586	21.8124	21.4855	21.747	21.6883	100	21.8224	0.310635	0.507749	1.08599	0.119011
SERPING1	Plasma protease C1 inhibitor	26.2256	23.6544	23.396	22.4713	23.4178	23.7898	23.1619	23.65	100	23.7208	23.4302	23.0894	23.9566	23.8274	22.4923	23.3601	22.4243	23.1278	23.1207	23.3173	23.4103	23.263	23.3696	100	23.2453	0.168824	0.772566	1.89451	0.921824
SHBG	Sex hormone-binding globulin		18.9375	19.089	17.9708	18.8272	20.3881	19.4832	19.5326	87.5	19.1755	19.5534	20.5621		20.9173	18.858	18.2519	17.5934	19.2559		20.9625	20.23	19.768	20.5024	84.6154	19.6777	0.18911	0.723286	0.631425	-0.663316
SLC4A1	Band 3 anion transport protein		16.1169	14.311	21.5201	19.375	15.2393			62.5	17.3125	17.3751	13.7755	19.0837	16.2066	21.7509	18.0371	18.1757	17.9007	14.9753		19.0048	15.1794	15.7664	92.3077	17.2693	1	0	1.57823	0.658308
STOM	Stomatin			16.2786	19.0321	17.712	17.1808	17.4588	17.1313	75	17.4656	16.7164		17.9007		18.52	16.9328	17.889				17.3233			46.1538	17.547	0.748774	0.125649	1.03368	0.0477846
TALDO1	Transaldolase		18.2995	17.7293	17.2282	18.4364	18.2738	19.3599	18.0413	87.5	18.1955		18.1854	17.3599		17.4694		19.8789		17.2597	17.7033	19.1368		17.3137	61.5385	18.0384	0.417887	0.378941	0.969072	-0.0453249
TF	Serotransferrin	24.2378	26.5625	26.8043	25.8121	27.1073	26.2706	26.7523	26.7959	100	26.2928	27.5775	27.4106	27.1982	27.7144	26.1923	27.0441	26.7674	27.775	27.4556	27.5866	27.3057	27.0122	26.6406	100	27.2062	0.00737178	2.13243	0.579491	-0.787142
TFRC	Transferrin receptor protein 1			17.7632		17.0726			16.826	37.5	17.2206	17.0742	17.4368		17.359				17.0245	16.8046	18.7929	18.4254	16.846	17.1397	69.2308	17.4337	0.643902	0.19118	0.794261	-0.332314
TGFBI	Transforming growth factor-beta-induced protein ig-h3	15.9487	18.2325	20.3664	22.2283	19.7254	20.8269	20.3847	20.2765	100	19.7487	21.1851	20.9245	19.1654	20.4461	22.149	21.1819	20.135	20.8672	21.1528	21.6595	21.4855	20.998	21.8568	100	21.0159	0.0357113	1.44719	0.630048	-0.666467
THBS1	Thrombospondin-1;		17.7496	17.2174	20.055	18.5995	18.8396	18.0886	16.292	87.5	18.1202	16.6224	16.343	18.3997	16.5111	19.8898	17.9144	16.8529		17.7353			16.4308	17.7822	76.9231	17.4482	0.241567	0.616963	1.5405	0.623397
THBS2	Thrombospondin-2			15.6043	19.6797		14.1851	16.5414		50	16.5026		15.0174	16.5168		19.4213	15.6465	16.6938		14.7686			16.7977	19.245	61.5385	16.7634	0.734095	0.134248	1.14732	0.198268
THBS4	Thrombospondin-4		18.6945	17.6617	18.187	17.8015			17.2492	62.5	17.9188	19.4903	18.4351	17.24	19.5391	19.2825	17.4485	19.8785	18.5483	18.8607	17.3324			18.1244	84.6154	18.5618	0.234233	0.630353	0.567142	-0.818219
TKT	Transketolase		19.382	19.2566	16.6857	19.4299	18.9683	20.5573	19.6716	87.5	19.1359	16.4513	19.0957	18.3575		17.5416	16.2949	20.4871	15.9722	16.808	18.4733	20.2288	16.2584	18.5728	92.3077	17.8785	0.051913	1.28472	1.73002	0.790788
TLN1	Talin-1		16.7264	16.535	17.4978	15.2694	15.7495	17.1974	15.7873	87.5	16.3947	15.1257	16.5843	17.7414	14.1929	17.443	14.8969	20.5673	14.6421	15.5087	16.5051	16.0878	14.3408	16.6402	100	16.1751	0.405381	0.392137	0.514139	-0.95977
TNC	Tenascin		16.1848	20.0449	21.0348	19.5334	18.9059	18.5982	19.4876	87.5	19.1128	19.9559	20.2644	16.0616	18.9664	21.0499	19.5958	19.5537	17.1766	20.0159	19.4442	18.0468	18.9965	19.1737	100	19.1001	0.905383	0.0431677	1.06709	0.0936854
TPI1	Triosephosphate isomerase		20.8917	21.3335	18.883	20.9301	19.7132	19.9334	19.8594	87.5	20.2206	19.1654	20.7552	22.403	18.2297	18.7223	20.7551	22.8897	18.5751	19.6262	19.2773	20.638	18.4069	19.7602	100	19.9388	0.250547	0.601111	0.801833	-0.318627
TTR	Transthyretin	23.9906	22.0404	23.5798	23.1573	23.2643	23.6536	22.8255	23.2548	100	23.2208	23.581	23.7322	24.4452	24.3086	22.933	24.2343	24.3191	23.458	23.263	23.9165	23.3695	22.7031	22.9011	100	23.628	0.168824	0.772566	0.747549	-0.419759
TUBB	Tubulin beta chain		19.6209	20.0219	19.2374	18.6319		17.793	17.7393	75	18.8407		19.0337	17.5178		19.1198	18.1955	22.4267	15.5765	17.6779	16.8823	17.13	15.7579	19.0427	84.6154	18.0328	0.107822	0.967293	0.733553	-0.447026
TXN	Thioredoxin		19.3065	17.5124	16.8055	18.0298		17.1821		62.5	17.7673			18.3136			17.8022	20.9979			17.2025	17.1182		16.9963	46.1538	18.0718	0.855132	0.0679668	0.533633	-0.906081
UBA1	Ubiquitin-like modifier-activating enzyme 1		16.5966	17.3167	17.2767	16.6682		16.8977		62.5	16.9512	16.0334	17.2588	16.5948		17.4691	16.2176	20.2044						15.4169	53.8462	17.0279	0.464902	0.332638	0.49459	-1.0157
UGDH	UDP-glucose 6-dehydrogenase			18.1325	18.0955	17.5713				37.5	17.9331	16.506	18.2657	16.9794		17.9073	18.0054	20.5653		17.2804	17.1066			17.1132	69.2308	17.7477	0.309177	0.509793	0.752144	-0.410919
UGP2	UTP--glucose-1-phosphate uridylyltransferase			18.5933	16.5716	17.7497		17.7212	16.8657	62.5	17.5003	16.7277		17.7937				20.8535				17.3008		17.029	38.4615	17.9409	0.754023	0.122616	0.415255	-1.26793
VAT1	Synaptic vesicle membrane protein VAT-1 homolog		17.3705	16.5267	16.3438	16.9511	16.5958	16.8752		75	16.7772	16.382	16.3466	16.363	16.6402	16.5246		18.9149			17.3361				53.8462	16.9296	0.668235	0.175071	0.728937	-0.456134
VCAN	Versican core protein			18.958	19.2901	18.5195	18.2338	18.129	16.9906	75	18.3535	20.0813	19.0452	17.7399	21.9548	19.4483	18.8397	20.4648	19.4041	19.9046	20.2495	18.53	17.5879	20.1012	100	19.4886	0.0352966	1.45227	0.369863	-1.43494
VCL	Vinculin		17.5894	16.9744	15.1086	16.5243	16.0532	18.053	15.8402	87.5	16.5919	16.6241	17.1475	17.8203	15.3635	15.6248	16.8168	20.9441	15.9416	15.3958	17.0824	18.3887	14.8792	16.7842	100	16.8318	0.905383	0.0431677	0.46192	-1.11429
VCP	Transitional endoplasmic reticulum ATPase		17.8557	17.3812	18.4953	18.2428		17.878	17.4012	75	17.8757			17.0029		18.445	18.0067	19.5179		16.596	17.0151	17.5356		19.2975	61.5385	17.9271	0.897279	0.0470725	0.779606	-0.359182
VIM	Vimentin		19.2176	18.9532	21.1122	20.2425	18.0277	18.316	19.0592	87.5	19.2755	19.1479	19.347	19.2666	18.2322	20.9247	19.2764	22.5562	18.6677	18.1307	19.5212	19.9257	16.8328	19.0596	100	19.2991	0.721397	0.141826	0.759532	-0.396817
VTN	Vitronectin	23.7456	24.481	24.097	25.4813	23.6312	22.9734	23.6599	24.2097	100	24.0349	23.4229	23.6884	23.5225	23.8891	25.3282	23.7027	22.8822	23.8388	23.9935	22.5577	22.2718	23.682	23.3009	100	23.5447	0.128301	0.891769	1.38966	0.474731
VWF	von Willebrand factor	17.5927	19.3879	19.138	19.2327	17.8902	20.1066	18.2411	18.5457	100	18.7669		17.6952	19.4703	16.1576	19.1265	17.9749	16.9634		17.4757		18.5619	17.9714	19.4302	76.9231	18.0827	0.248058	0.605448	1.47807	0.563716
YWHAG	14-3-3 protein gamma			17.7988	17.9746			17.3554		37.5	17.7096	17.6319	17.8025	18.3734		18.2318	17.7624	19.7655			17.3582	18.5312			61.5385	18.1821	0.384821	0.414741	0.746813	-0.421181
YWHAZ	14-3-3 protein zeta/delta		18.4479	18.4064	19.4188	18.7277	19.9439	18.6452	18.6386	87.5	18.8898	17.9387	18.5748	18.5677	17.3777	18.9745	18.5023	20.7221	18.026	18.1729	18.5999	19.3321	18.2935	18.467	100	18.5807	0.307434	0.512248	0.635886	-0.653161
		27.8852	26.7129	27.2714	26.0783	27.5475	28.0632	27.1607	27.1263	100	27.2307	27.4166	27.3245	27.7579	27.9767	26.2805	27.5155	27.3517	27.5273	27.3607	27.3974	27.283	27.3368	26.8027	100	27.3332	0.14265	0.845728	1.11267	0.154032
	Immunoglobulin lambda variable 3-27;Immunoglobulin lambda variable 3-25	19.8677	18.6835	20.6706	20.4742	20.897	20.9426	19.5355	21.311	100	20.2978	20.7388	18.9096	20.2116	20.7043	20.0705	20.2341	20.6687	20.939	20.8936	20.8251	19.9278	21.2667	19.9057	100	20.4073	0.307434	0.512248	0.635886	-0.653161
	Immunoglobulin lambda variable 3-21	23.5232	21.7323	23.8055	20.4996	21.5894	22.4193	21.3128	22.3212	100	22.1504	22.6696	20.8088	22.2534	22.0455	21.057	22.2704	21.951	21.6246	20.8854	21.5909	22.2457	22.0191	21.1951	100	21.7397	0.14265	0.845728	1.11267	0.154032
	Immunoglobulin lambda variable 3-19	20.3201	20.0874	19.1571	17.8856	19.543	18.3608	19.731	19.4531	100	19.3173	20.4798	19.5167	18.4499	19.5052	17.8264	19.3745	19.0181	19.0527	19.7541	19.6806	17.7402	18.7769		92.3077	19.0979	0.440401	0.356152	1.59878	0.676975
	Immunoglobulin kappa variable 3-20		24.0711	25.7657	24.1588	25.0152	22.5993	24.7083	25.3225	87.5	24.5201	24.9894	25.6885	24.5563	25.2133	24.6398	25.3369	24.5242	25.1098	24.3211	24.7577	25.0006	24.6264	24.574	100	24.8722	0.606498	0.217171	0.98685	-0.019098
	Immunoglobulin lambda variable 1-47;Immunoglobulin lambda variable 1-44	22.5342		23.2177	21.8665	21.0965	21.8552	21.541	21.2875	87.5	21.9141	22.1615	23.6081	22.5393	23.0657		22.0129	21.9627	22.902	22.4319	19.6304		22.2227		76.9231	22.2537	0.143235	0.843951	1.24192	0.312572
	Ig-like domain-containing protein (Fragment)	20.5848		17.3972	18.8438	18.7995		19.0376	20.056	75	19.1198	18.5687	19.5561	19.2127	19.7067	18.7598	19.8121	18.6289	19.2342	20.1482	19.2131	19.0272	18.5416	18.5282	100	19.149	0.860756	0.0651198	1.11025	0.150886
	Immunoglobulin heavy variable 1-69		17.811	19.372	17.949	18.0827		18.9797		62.5	18.4389	17.1822	18.501	18.0881	18.919	17.9782	16.6942	18.1599	18.8361	18.5792	18.7368	17.9334	18.4142	17.3177	100	18.1031	0.587715	0.230833	1.15772	0.21128
	Immunoglobulin lambda variable 6-57			20.306	18.5454	19.921	19.4971	19.7028		62.5	19.5944	19.3867	20.9122	19.8178	20.1378	18.4805	19.5069	20.1388		18.9884	19.1871	18.3363	19.0161	17.8688	92.3077	19.3148	0.399075	0.398945	0.911406	-0.133834
	Immunoglobulin heavy variable 2-70D			18.2608	19.3648	18.8911		21.2405		50	19.4393	18.0512	19.5965	19.6692	18.8974	18.2991		19.0684	20.6908	18.4581		20.885	19.0723	19.8633	84.6154	19.3228	0.896125	0.0476315	1.15414	0.20682
	Immunoglobulin heavy variable 1-2		19.3053		18.0129	19.9446		18.4369		50	18.9249	19.9841	19.713		19.0191	18.393		19.1413	19.6158	18.8188			19.0697	18.7898	69.2308	19.1716	0.643429	0.191499	1.26809	0.342659

## Sheet: Supplementary Table S3
Supplementary Table 3: List of significantly enriched Reactome pathways (FDR<0.05). Reactome uses a hierarchical organisation of the pathways. Based on the location of the pathway in the pathway hierarchy (given in the table), pathways belonging to the same “Parental pathway” were grouped.
Functional Category	Main parental pathway	Locations in the pathway Browser	No. of assined proteins	Total no. of proteins in the pathway	Enrichment FDR	Assigned proteins
Platelet degranulation	Hemostasis	Hemostasis Platelet activation, signaling and aggregation Response to elevated platelet cytosolic Ca2+ Platelet degranulation	9	141	6.4E-8	FN1, AHSG, CFD, ACTN1, TF, CLEC3B, SERPINA4, PFN1, CAP1
Response to elevated platelet cytosolic Ca2+	Hemostasis	Hemostasis Platelet activation, signaling and aggregation Response to elevated platelet cytosolic Ca2+	9	148	6.4E-8	FN1, AHSG, CFD, ACTN1, TF, CLEC3B, SERPINA4, PFN1, CAP1
Platelet activation, signaling and aggregation	Hemostasis	Hemostasis Platelet activation, signaling and aggregation	9	293	1.47E-5	FN1, AHSG, CFD, ACTN1, TF, CLEC3B, SERPINA4, PFN1, CAP1
Hemostasis	Hemostasis	Hemostasis	12	803	1.57E-4	FN1, AHSG, ANXA2, IGLV7-46, CFD, ACTN1, TF, CLEC3B, SERPINA4, PFN1, CAP1
Innate Immune System	Immune System	Immune System Innate Immune System	15	1.341	1.79E-4	C4BPB, AHSG, C9, CRP, CFD, APCS, C1QA, GSN, CAP1, S100A8, S100A9, LRG1, ANXA2, IGLV7-46, SERPINB1
Complement cascade	Immune System	Immune System Innate Immune System Complement Cascade	6	156	3.1E-4	C4BPB, IGLV7-46, C9, CRP, CFD, APCS, C1QA
Neutrophil degranulation	Immune System	Immune System Innate Immune System Neutrophil degranulation	9	478	3.47E-4	S100A8, S100A9, LRG1, AHSG, ANXA2, CFD, SERPINB1, GSN, CAP1
ECM proteoglycans	Extracellular matrix organization	Extracellular matrix organization ECM proteoglycans	4	79	3.25E-3	FN1, COL6A3, VCAN, COMP
Amyloid fiber formation	Metabolism of proteins	Metabolism of proteins Amyloid fiber formation	4	89	4.59E-3	APCS, TGFBI, GSN, HIST1HBL
Immune System	Immune System	Immune System	18	2.627	5.86E-3	C4BPB, AHSG, C9, CRP, CFD, APCS, C1QA, GSN, CAP1, FN1, S100A8, S100A9, LRG1, ANXA2, IGLV7-46, SERPINB1
Post-translational protein phosphorylation	Metabolism of proteins	Metabolism of proteins Post-translational protein modification Post-translational protein phosphorylation	4	109	7.93E-3	FN, VCAN, TF, AHSG
Extracellular matrix organization	Extracellular matrix organization	Extracellular matrix organization	6	328	9.06E-3	FN, COL6A3, EFEMP-1, ACTN1, VCAN, COMP
Initial triggering of complement	Immune System	Immune System Innate Immune System Complement cascade Initial triggering of complement	4	120	9.76E-3	CRP, CFD, APCS, C1QA, IGLV7-46
Regulation of Insulin-like Growth Factor (IGF) transport and uptake by Insulin-like Growth Factor Binding Proteins (IGFBPs)	Metabolism of proteins	Metabolism of proteins Regulation of Insulin-like Growth Factor (IGF) transport and uptake by Insulin-like Growth Factor Binding Proteins (IGFBPs)	4	127	1.11E-2	FN, VCAN, TF, AHSG
Metal sequestration by antimicrobial proteins	Immune System	Immune System Innate Immune System Antimicrobial peptides Metal sequestration by antimicrobial proteins	2	13	1.34E-2	S100A8, S100A9
Regulation of Complement cascade	Immune System	Immune System Innate Immune System Complement cascade Regulation of Complement cascade	4	139	1.34E-2	C1QA, C4BPB, IGLV7-46, C9
NFE2L2 regulates pentose phosphate pathway genes	Cellular responses to stimuli	Cellular responses to stimuli Cellular responses to stress Cellular response to chemical stress KEAP1-NFE2L2 pathway Nuclear events mediated by NFE2L2 NFE2L2 regulates pentose phosphate pathway genes	2	15	1.61E-2	PGD
Integrin cell surface interactions	Extracellular matrix organization	Extracellular matrix organization Integrin cell surface interactions	3	86	3.41E-2	FN1, COL6A3, COMP
MyD88 deficiency (TLR2/4)	Disease	Disease Diseases of Immune System Diseases associated with the TLR signaling cascade MyD88 deficiency (TLR2/4)	2	26	4.2E-2	S100A8, S100A9
Classical antibody-mediated complement activation	Immune System	Immune System Innate Immune System Complement cascade Initial triggering of complement Creation of C4 and C2 activators Classical antibody-mediated complement activation	3	97	4.22E-2	CRP, APCS, C1QA, IGLV7-46
